# Supplementary material for: Monoallelically expressed noncoding RNAs form nucleolar territories on NOR-containing chromosomes and regulate rRNA expression
Source: eLife journal article supplement (doi:10.7554/elife.80684), 2024-01-19

73.2% Identity

SNUL-1 Probe 4 CAAATAACCCCCCATCATACCCTGCCCC ATGTCTTCTCTACTCTCTCCCTCATGCTTTCTCTCTCTCTCTCTCTGTCTCTCTCTCTCTCTCT  
:: :::: : :: : :: :::: : :::::: : :::::: : :::::: : ::::::  
SNUL-2 probe ATTA ATTTCTTGAGC-ACGCCCTTCTCCC---CCTCTCTGTCTCTGTCTGTCTGTCTGTCTGTCTGTCT

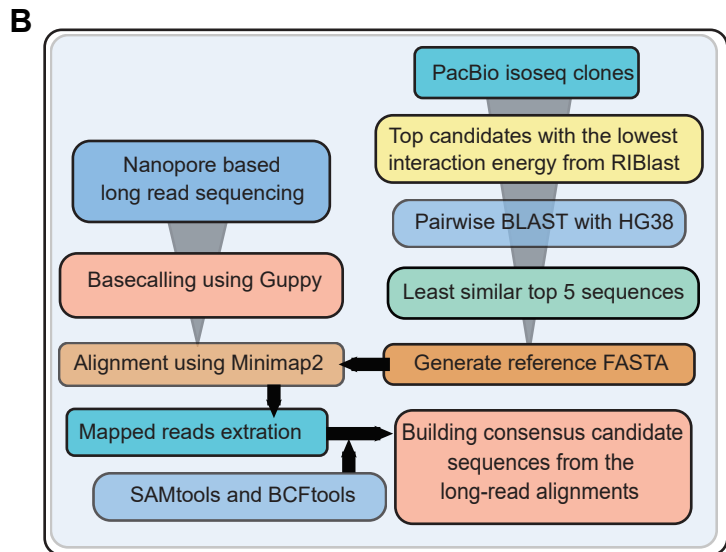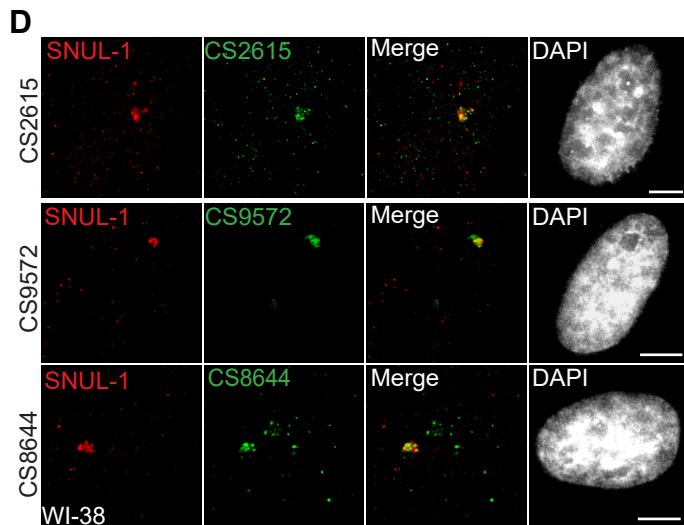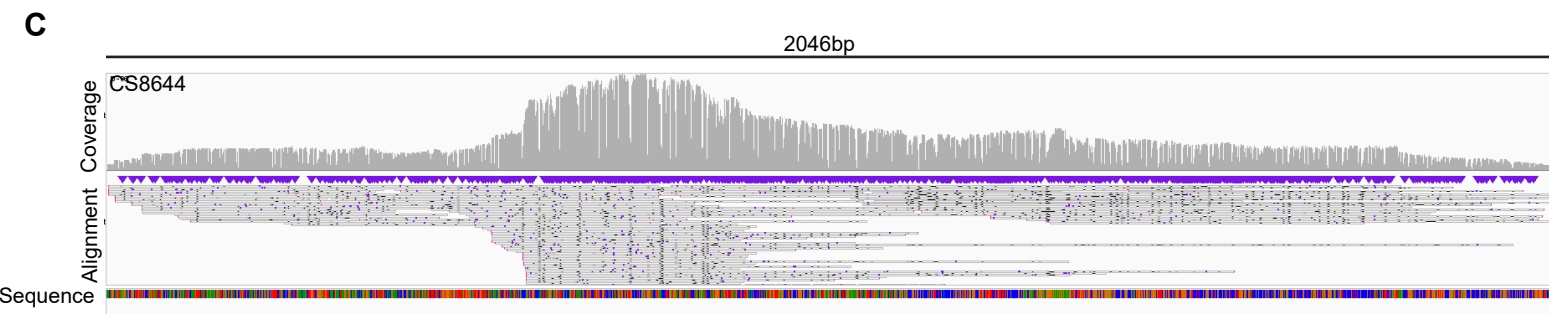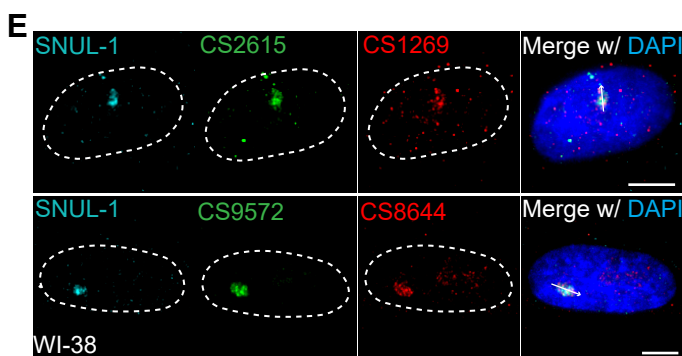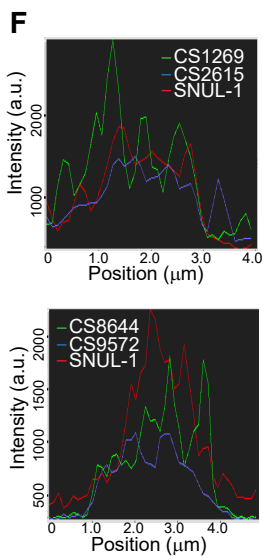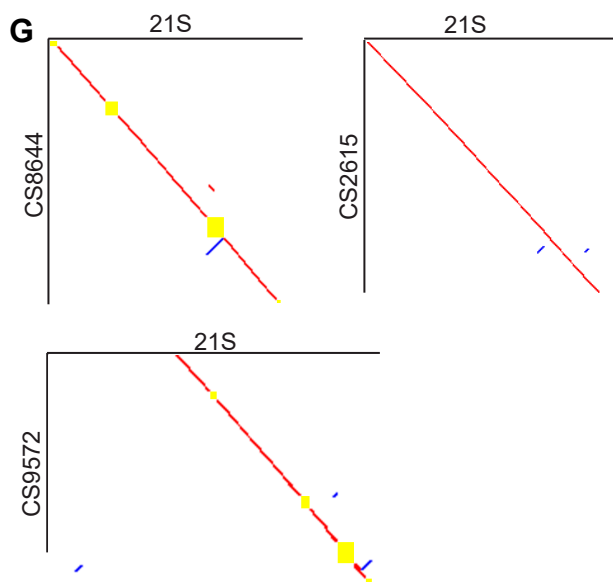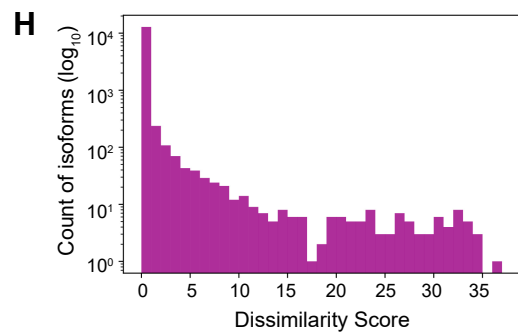

Supplement: supp [file elife_poa_e80684_Figure_1_figure_supplement_2.pdf › elife_poa_e80684_Figure_1_figure_supplement_2.pdf]
