# Supplementary material for: Monoallelically expressed noncoding RNAs form nucleolar territories on NOR-containing chromosomes and regulate rRNA expression
Source: eLife journal article supplement (doi:10.7554/elife.80684), 2024-01-19
Supplement: supp [file Figure 4-figure supplement 1-Source Data 1.xlsx]

## Sheet: Fig.S4b
2020-01-16	Int Den of 15SatIII	Relative Int Den	2020-01-19			2020-01-20				38.4	6.31105
1	1.065	4.55128	1	0.358	1.68075	1	0.535	53.5		36.375	4.33155
	0.234			0.213			0.01			29.1538
2	0.815	15.6731	2	0.519		2	0.093	2.21429		27.1538
	0.052			0.384			0.042			24.7692
3	2.399	3.63485		0.903	3.96053	3	0.473	3.63846		23.2381
	0.66			0.228			0.13			19.3
4	1.137	5.2156	3	0.327	65.4	4	0.556	7.61644		17.7
	0.109			0.005			0.073			15.9524
	0.01		4	0.67		5	0.026			15.6731
	0.099			0.005			0.062			14.899
	0.218			0.675	2.72177		0.005			14.8088
5	0.846	5.60265		0.036			0.093	4.42857		13.3205
	0.151			0.119			0.021			13.1923
6	1.231			0.093		4	0.8	3.58744		12.9518
	0.016			0.248			0.223			12.4521
	1.247	4.70566	5	1.231	9.848	5	0.602	6.47312		12.4
	0.042			0.125			0.093			11.2619
	0.223		6	0.364		6	0.976	2.60963		10.9872
	0.265			0.005			0.374			10.68
7	1.345	9.60714		0.369	1.39245	7	0.737	3.23246		10.5342
	0.036			0.265			0.228			10.1927
	0.057		7	0.27	1.10656	8	0.421	3.23846		9.848
	0.047			0.244			0.13			9.80645
	0.14		8	1.039	13.3205	9	0.769	3.69712		9.79825
8	1.226	3.065		0.078			0.208			9.61364
	0.4		9	0.67	15.9524	10	0.343	1.29434		9.60714
9	0.618	2.64103		0.042			0.265			8.78462
	0.234		10	1.044	4.57895	11	0.473	5.375		7.88889
10	0.909	12.4521		0.228			0.088			7.86429
	0.073		11	0.8	3.66972	12	0.992	2.51139		7.85227
11	0.971	3.11218		0.218			0.395			7.70968
	0.312		12	0.519	7.10959	13	0.358	3.84946		7.68421
12	1.335	10.68		0.073			0.093			7.61644
	0.125		13	1.007	4.04418	14	0.473	3.37857		7.60606
13	0.488	23.2381		0.249			0.135			7.2236
	0.021		14	0.826	2.56522		0.005			7.10959
14	1.2	4.44444		0.322			0.14			6.94578
	0.27		15	0.706	4.6755	15	0.28	3.58974		6.57447
15	1.236	4.57778		0.151			0.078			6.52564
	0.27		16	0.634	6.40404	16	0.286			6.47312
16	0.717	6.02521		0.099			0.119			6.40404
	0.119		17	0.867			0.405	3		6.25641
17	0.561	3.48447		0.379			0.135			6.02521
	0.161			1.246	2.52738	17	0.644	24.7692		5.95413
18	0.608	9.80645		0.493			0.026			5.83077
	0.062		18	0.758	5.01987	18	0.919	5.70807		5.76147
19	0.961	3.55926		0.151			0.161			5.73684
	0.27		19	0.628	5.76147	19	0.976	6.25641		5.70807
20	1.101	7.86429		0.109			0.156			5.64348
	0.14		20	1.2	2.78422	20	0.737	3.38073		5.60265
22	0.343	4.69863		0.431			0.218			5.50549
	0.073		21	0.878	3.59836	21	0.223	1.34337		5.49286
23	0.473	11.2619		0.244			0.005			5.43182
	0.042		22	0.654	2.46792		0.161			5.375
24	1.044	5.01923		0.265			0.166			5.30303
	0.208		23	0.769	5.49286	22	0.14	1.50538		5.22517
25	1.007	14.8088		0.14			0.093			5.2156
	0.068		24	0.177		23	0.602	3.85897		5.01987
26	0.691	7.85227		0.016			0.156			5.01923
	0.088			0.193	19.3	24	0.062	12.4		4.99359
27	0.758	29.1538		0.01			0.005			4.75
	0.026		25	0.618	6.57447	25	0.504	1.8		4.70566
28	0.41	2.54658		0.042			0.28			4.69863
	0.161			0.016		26	1.226	4.45818		4.6755
29	0.628	4.65185		0.036			0.275			4.65185
	0.135			0.094		27	0.758	5.83077		4.57895
9	1.002	5.50549	26	0.649	5.64348		0.13			4.57778
	0.166			0.016		28	0.395	2.92593		4.55128
	0.016			0.099			0.135			4.46199
	0.182			0.115		29	0.753	7.60606		4.45818
21	0.254		27	1.075	12.9518		0.099			4.44444
	0.249			0.083		30	0.343	13.1923		4.42857
	0.503	1.75874	28	0.805	3.69266		0.026			4.35385
	0.286			0.218		31	0.779	4.99359		4.33155
22	0.441	1.88462	29	1.117	9.79825		0.156			4.28746
	0.234			0.114		32	0.81	4.33155		4.19289
23	0.763	4.46199	30	0.478	5.43182		0.187			4.19277
	0.171			0.088		33	0.493	3.16026		4.04828
24	0.177	17.7	31	0.634			0.156			4.04418
	0.01			0.275		34	1.007	3.07951		3.9797
25	1.111	10.1927		0.909	2.91346		0.327			3.97736
	0.109			0.312		35	0.878	2.31662		3.96053
26	0.509	6.52564	32	0.447	1.56294		0.379			3.85897
	0.078			0.286		36	0.218	1.91228		3.84946
27	0.525	5.30303	33	0.156			0.114			3.74194
	0.099			0.156		37	0.613	3.11168		3.73373
28	1.402	4.28746		0.312	3		0.197			3.69712
	0.327			0.104		38	0.587	4.04828		3.69266
29	0.826	4.19289	34	1.091	2.53132		0.145			3.66972
	0.197			0.431		39	0.582	36.375		3.66239
30	0.042		35	1.142	8.78462		0.016			3.63846
	0.306			0.13		40	0.348	3.74194		3.63485
	0.348	4.19277	36	1.013	2.67282		0.093			3.59836
	0.083			0.379		41	0.327	5.73684		3.58974
32	1.127	2.89717	37	1.091	3.56536		0.057			3.58744
	0.389			0.306		42	0.706	27.1538		3.57895
32	0.914	3.32364	38	0.857	10.9872		0.026			3.57045
	0.275			0.01		43	0.239	7.70968		3.56536
33	1.163	7.2236		0.068			0.031			3.55926
	0.161			0.078		44	0.769	10.5342		3.48447
34	1.314	7.68421	39	1.262	3.73373		0.073			3.43019
	0.171			0.338		45	0.026			3.38073
35	1.054	3.97736	40	0.312			0.01			3.37857
	0.265			0.088			0.088			3.36134
36	0.909	3.43019		0.4	3.36134		0.068			3.32364
	0.265			0.119			0.192	38.4		3.23846
37	0.846	9.61364	41	0.987	2.71154		0.005			3.23246
	0.083			0.364						3.16026
	0.005		42	0.483	1.5					3.11218
	0.088			0.322						3.11168
38	1.039	3.57045	43	0.649	5.95413					3.07951
	0.291			0.109						3.065
39	0.608		44	0.789	5.22517					3
	0.208			0.151						3
	0.816	3.57895	45	0.784	3.9797					2.92593
	0.228			0.197						2.91346
			46	0.857	3.66239					2.89717
				0.234						2.78422
			47	0.597	1.98339					2.73779
				0.301						2.72177
			48	0.665	4.75					2.71154
				0.14						2.67282
			49	0.462						2.64103
				0.042						2.60963
				0.504	1.54128					2.56522
				0.327						2.54658
			50	0.566	4.35385					2.53132
				0.13						2.52738
			51	1.065	2.73779					2.51139
				0.389						2.46792
			52	1.153	6.94578					2.36014
				0.166						2.31662
			53	1.475	14.899					2.21429
				0.099						2.05263
			54	1.065	7.88889					1.98339
				0.135						1.91228
			55	0.675	2.36014					1.88462
				0.286						1.8
			56	0.208						1.75874
				0.026						1.68075
				0.234	2.05263					1.56294
				0.114						1.54128
										1.50538
										1.5
										1.39245
										1.34337
										1.29434
										1.10656

## Sheet: Fig.S4d
15CEN-scr		Label	Area	Mean	Min	Max	Major	Minor	Angle	Circ.	IntDen	RawIntDen	AR	Round	Solidity				15SatIII-scr		Label	Area	Mean	Min	Max	Major	Minor	Angle	Circ.	IntDen	RawIntDen	AR	Round	Solidity				15 CEN-ASOSNUL	Area	Mean	Min	Max	Major	Minor	Angle	Circ.	IntDen	RawIntDen	AR
	1	Experiment-685-Deconvolution (defaults)-processed.czi:c:1/3 - Experiment-685-Deconvolution (defaults)-processed.cz	0.789	14960.8	8186	35364	1.331	0.755	68.504	0.686	11809.4	2274034	1.762	0.568	0.826					1	Experiment-685-Deconvolution (defaults)-processed.czi:c:2/3 - Experiment-685-Deconvolution (defaults)-processed.cz	0.706	25060.5	15987	39322	1.274	0.706	36.367	0.744	17699.4	3408232	1.805	0.554	0.858					1.028	16787	8583	33524	1.418	0.923	41.538	0.812	17261.1	3323820	1.536
		Experiment-685-Deconvolution (defaults)-processed.czi:c:1/3 - Experiment-685-Deconvolution (defaults)-processed.cz	1.018	14326.2	8158	32832	1.482	0.875	1.586	0.755	14582	2807940	1.694	0.59	0.895	1.29024	1.23478				Experiment-685-Deconvolution (defaults)-processed.czi:c:2/3 - Experiment-685-Deconvolution (defaults)-processed.cz	1.838	26050.9	15677	51293	1.854	1.262	171.404	0.518	47891.3	9222023	1.469	0.681	0.744	2.6034	2.70581			1.314	16284.7	8552	51448	1.467	1.141	136.629	0.549	21396	4120040	1.286
	2	Experiment-685-Deconvolution (defaults)-processed.czi:c:1/3 - Experiment-685-Deconvolution (defaults)-processed.cz	1.252	13622	8154	28047	2.382	0.669	4.008	0.456	17048.6	3282907	3.562	0.281	0.781	1.2179	1.14003			2	Experiment-685-Deconvolution (defaults)-processed.czi:c:2/3 - Experiment-685-Deconvolution (defaults)-processed.cz	0.727	21680.9	15683	36824	1.603	0.577	58.704	0.378	15762.9	3035324	2.777	0.36	0.697					0.743	17260.5	8636	35757	1.017	0.93	58.135	0.883	12818	2468252	1.093
		Experiment-685-Deconvolution (defaults)-processed.czi:c:1/3 - Experiment-685-Deconvolution (defaults)-processed.cz	1.028	14543.8	8167	33017	1.452	0.902	173.564	0.564	14954.5	2879668	1.61	0.621	0.825						Experiment-685-Deconvolution (defaults)-processed.czi:c:2/3 - Experiment-685-Deconvolution (defaults)-processed.cz	1.672	28535.2	15716	65535	1.735	1.227	172.929	0.85	47716.4	9188342	1.413	0.708	0.915	2.29986	3.02714			0.68	16556	8574	36789	0.946	0.916	71.231	0.931	11263.1	2168831	1.033
	3	Experiment-685-Deconvolution (defaults)-processed.czi:c:1/3 - Experiment-685-Deconvolution (defaults)-processed.cz	0.519	12532.1	8211	17241	1.091	0.606	144.482	0.658	6508.12	1253214	1.799	0.556	0.826					3	Experiment-685-Deconvolution (defaults)-processed.czi:c:2/3 - Experiment-685-Deconvolution (defaults)-processed.cz	3.251	24959.4	15684	43376	2.17	1.908	27.191	0.615	81140.7	15624563	1.137	0.879	0.853	19.0117				1.148	13976.5	8560	24024	1.613	0.906	162.478	0.422	16040.6	3088810	1.781
		Experiment-685-Deconvolution (defaults)-processed.czi:c:1/3 - Experiment-685-Deconvolution (defaults)-processed.cz	1.257	14506.2	8157	35046	1.309	1.222	151.059	0.733	18230.6	3510502	1.071	0.934	0.877	2.42197	2.8012				Experiment-685-Deconvolution (defaults)-processed.czi:c:2/3 - Experiment-685-Deconvolution (defaults)-processed.cz	0.171	19092.4	15733	23687	0.545	0.4	119.467	0.892	3271.93	630048	1.361	0.735	0.857		24.799			1.07	15956.4	8600	30392	1.398	0.975	67.036	0.78	17070	3287021	1.434
	4	Experiment-685-Deconvolution (defaults)-processed.czi:c:1/3 - Experiment-685-Deconvolution (defaults)-processed.cz	0.717	15819.5	8158	28818	1.108	0.823	73.322	0.871	11337.1	2183088	1.347	0.743	0.939					4	Experiment-685-Deconvolution (defaults)-processed.czi:c:2/3 - Experiment-685-Deconvolution (defaults)-processed.cz	0.883	20666.3	15741	28400	1.366	0.823	138.35	0.631	18244.9	3513266	1.659	0.603	0.872					1.002	14098.2	8569	25641	1.331	0.959	11.141	0.86	14130.4	2720962	1.387
		Experiment-685-Deconvolution (defaults)-processed.czi:c:1/3 - Experiment-685-Deconvolution (defaults)-processed.cz	0.478	13200.9	8152	21315	0.917	0.663	173.04	0.799	6306.98	1214481	1.383	0.723	0.868	1.5	1.79755				Experiment-685-Deconvolution (defaults)-processed.czi:c:2/3 - Experiment-685-Deconvolution (defaults)-processed.cz	1.303	23576.4	15685	42664	1.683	0.986	132.855	0.436	30731.4	5917678	1.707	0.586	0.739	1.47565	1.68438			0.992	15634.8	8573	29984	1.307	0.966	60.861	0.851	15508	2986246	1.353
	5	Experiment-685-Deconvolution (defaults)-processed.czi:c:1/3 - Experiment-685-Deconvolution (defaults)-processed.cz	0.976	16974.8	8153	51769	1.144	1.086	130.644	0.856	16572.7	3191257	1.054	0.949	0.879	1.45672	1.62925			5	Experiment-685-Deconvolution (defaults)-processed.czi:c:2/3 - Experiment-685-Deconvolution (defaults)-processed.cz	1.641	23887.8	15769	42507	2.288	0.913	31.137	0.467	39200.7	7548549	2.506	0.399	0.764	4.64873				3.012	16742	8554	63709	3.196	1.2	147.626	0.528	50427.3	9710357	2.663
		Experiment-685-Deconvolution (defaults)-processed.czi:c:1/3 - Experiment-685-Deconvolution (defaults)-processed.cz	0.67	15183.9	8204	34527	1.025	0.832	51.887	0.679	10171.9	1958723	1.232	0.811	0.824						Experiment-685-Deconvolution (defaults)-processed.czi:c:2/3 - Experiment-685-Deconvolution (defaults)-processed.cz	0.353	20899.9	15694	35136	1.524	0.295	125.619	0.405	7380.48	1421196	5.165	0.194	0.677		5.31141			0.047	9679.11	8649	10757	0.338	0.176	135	0.884	452.385	87112	1.915
	6	Experiment-685-Deconvolution (defaults)-processed.czi:c:1/3 - Experiment-685-Deconvolution (defaults)-processed.cz	0.582	11750	8205	17923	1.241	0.597	159.469	0.352	6834.16	1315996	2.079	0.481	0.612					6	Experiment-685-Deconvolution (defaults)-processed.czi:c:2/3 - Experiment-685-Deconvolution (defaults)-processed.cz	0.717	30379.9	15803	57374	1.075	0.849	21.045	0.884	21771.9	4192425	1.267	0.79	0.911					0.815	13028.7	8558	23867	2.153	0.482	45.09	0.348	10622.6	2045508	4.466
		Experiment-685-Deconvolution (defaults)-processed.czi:c:1/3 - Experiment-685-Deconvolution (defaults)-processed.cz	0.748	18628.2	8154	55838	0.996	0.956	173.633	0.889	13930.4	2682465	1.041	0.961	0.906	0.582	2.03835				Experiment-685-Deconvolution (defaults)-processed.czi:c:2/3 - Experiment-685-Deconvolution (defaults)-processed.cz	1.651	27850.4	15680	45074	1.798	1.169	150.665	0.811	45992.6	8856412	1.538	0.65	0.916	2.30265	2.11248			0.784	15361.8	8561	26260	1.21	0.825	84.935	0.834	12046.2	2319636	1.467
	7	Experiment-685-Deconvolution (defaults)-processed.czi:c:1/3 - Experiment-685-Deconvolution (defaults)-processed.cz	0.519	13041.5	8152	22234	1.096	0.603	117.648	0.641	6772.64	1304149	1.816	0.551	0.8					7	Experiment-685-Deconvolution (defaults)-processed.czi:c:2/3 - Experiment-685-Deconvolution (defaults)-processed.cz	0.473	27227.6	16155	43659	1.256	0.479	134.977	0.658	12867.1	2477715	2.62	0.382	0.835					1.724	17698.7	8564	44050	1.636	1.342	173.623	0.795	30514.7	5875954	1.219
		Experiment-685-Deconvolution (defaults)-processed.czi:c:1/3 - Experiment-685-Deconvolution (defaults)-processed.cz	0.608	13607.1	8192	23690	0.893	0.866	71.638	0.928	8267.65	1592030	1.032	0.969	0.929	1.17148	1.22074				Experiment-685-Deconvolution (defaults)-processed.czi:c:2/3 - Experiment-685-Deconvolution (defaults)-processed.cz	1.205	28935.7	15680	45325	1.356	1.131	172.739	0.811	34862	6713080	1.198	0.834	0.904	2.54757	2.70938			1.942	19166.9	8580	65535	1.632	1.515	31.834	0.825	37226.6	7168415	1.077
	8	Experiment-685-Deconvolution (defaults)-processed.czi:c:1/3 - Experiment-685-Deconvolution (defaults)-processed.cz	0.177	9536.24	8208	12155	0.718	0.313	20.585	0.577	1683.78	324232	2.293	0.436	0.687						Experiment-685-Deconvolution (defaults)-processed.czi:c:2/3 - Experiment-685-Deconvolution (defaults)-processed.cz	0.909	24406.6	15760	45383	1.435	0.807	165.878	0.554	22180.7	4271149	1.778	0.562	0.778					0.109	11075	9019	13617	0.453	0.307	172.798	1	1207.8	232575	1.475
		Experiment-685-Deconvolution (defaults)-processed.czi:c:1/3 - Experiment-685-Deconvolution (defaults)-processed.cz	0.332	17166.3	8261	34444	0.702	0.603	143.175	0.958	5705.4	1098641	1.163	0.86	0.914	1.87571	3.38844				Experiment-685-Deconvolution (defaults)-processed.czi:c:2/3 - Experiment-685-Deconvolution (defaults)-processed.cz	0.104	23032.8	17355	30282	0.378	0.349	116.565	1	2392.25	460655	1.083	0.923	0.889					0.327	13542.5	8804	22906	0.857	0.486	121.346	0.844	4430.67	853177	1.762
	9	Experiment-685-Deconvolution (defaults)-processed.czi:c:1/3 - Experiment-685-Deconvolution (defaults)-processed.cz	0.743	16201.5	8156	37124	1	0.946	22.463	0.926	12031.5	2316811	1.058	0.945	0.932	1.19262	1.34025				Experiment-685-Deconvolution (defaults)-processed.czi:c:2/3 - Experiment-685-Deconvolution (defaults)-processed.cz	0.525	23992.6	15746	37173	0.927	0.721	174.21	0.851	12584.3	2423249	1.285	0.778	0.898					0.005	8554	8554	8554	0.081	0.081	0	1	44.422	8554	1
		Experiment-685-Deconvolution (defaults)-processed.czi:c:1/3 - Experiment-685-Deconvolution (defaults)-processed.cz	0.623	14405.3	8174	38268	1.288	0.616	157.702	0.625	8977.06	1728636	2.091	0.478	0.811					8		1.538	71431.9	48861	112838	2.74	1.877	456.653	2.405	37157.2	7155053	4.146	2.263	2.565	2.92952				0.208	13609.8	9236	20515	0.566	0.468	134.999	1	2827.1	544391	1.209
	10	Experiment-685-Deconvolution (defaults)-processed.czi:c:1/3 - Experiment-685-Deconvolution (defaults)-processed.cz	0.867	16815.6	8157	42662	1.266	0.872	163.12	0.814	14583.5	2808213	1.453	0.688	0.891		1.13035				Experiment-685-Deconvolution (defaults)-processed.czi:c:2/3 - Experiment-685-Deconvolution (defaults)-processed.cz	0.525	24766.9	15895	44769	1.218	0.548	160.227	0.662	12990.4	2501454	2.221	0.45	0.818		2.86036			0.021	9301.75	8717	9609	0.163	0.163	0	1	193.221	37207	1
		Experiment-685-Deconvolution (defaults)-processed.czi:c:1/3 - Experiment-685-Deconvolution (defaults)-processed.cz	0.961	17158.2	8175	41436	1.245	0.982	33.568	0.87	16484.4	3174261	1.268	0.789	0.902	1.10842				9	Experiment-685-Deconvolution (defaults)-processed.czi:c:2/3 - Experiment-685-Deconvolution (defaults)-processed.cz	1.361	25464	15705	44931	2.167	0.799	3.108	0.432	34646.4	6671558	2.71	0.369	0.767	2.64786				0.67	56083	44330	75201	2.12	1.505	429.143	4.844	8703.21	1675904	6.446
	11	Experiment-685-Deconvolution (defaults)-processed.czi:c:1/3 - Experiment-685-Deconvolution (defaults)-processed.cz	0.654	17143.2	8160	36551	1.006	0.828	5.159	0.82	11217.4	2160041	1.215	0.823	0.881						Experiment-685-Deconvolution (defaults)-processed.czi:c:2/3 - Experiment-685-Deconvolution (defaults)-processed.cz	0.332	22402.6	15805	34282	0.753	0.562	129.84	0.891	7445.76	1433766	1.34	0.746	0.883					0.898	16877.6	8579	41232	1.21	0.946	115.476	0.781	15163.1	2919833	1.279
		Experiment-685-Deconvolution (defaults)-processed.czi:c:1/3 - Experiment-685-Deconvolution (defaults)-processed.cz	0.737	16173	8160	38655	1.109	0.847	9.185	0.833	11926.4	2296562	1.309	0.764	0.91	1.12691	1.0632				Experiment-685-Deconvolution (defaults)-processed.czi:c:2/3 - Experiment-685-Deconvolution (defaults)-processed.cz	0.182	24629	15739	35817	0.598	0.387	151.156	1	4476.58	862016	1.544	0.648	0.886					0.353	13533.3	8668	20180	0.773	0.582	161.777	0.689	4779.08	920266	1.328
																						0.514	47031.6	31544	70099	1.351	0.949	280.996	1.891	11922.3	2295782	2.884	1.394	1.769		2.90601			0.005	8610	8610	8610	0.081	0.081	0	1	44.713	8610	1
	1	Experiment-686-Deconvolution (defaults)-processed.czi:c:1/3 - Experiment-686-Deconvolution (defaults)-processed.cz	0.4	15710.3	8563	26047	0.774	0.658	68.136	0.923	6282.11	1209693	1.176	0.851	0.906																								0.042	9524.5	8638	10095	0.344	0.154	0	0.82	395.697	76196	2.232
		Experiment-686-Deconvolution (defaults)-processed.czi:c:1/3 - Experiment-686-Deconvolution (defaults)-processed.cz	0.519	15432.7	8584	30166	0.847	0.781	139.98	0.868	8014.43	1543271	1.085	0.922	0.897	1.2975	1.27575			1	Experiment-686-Deconvolution (defaults)-processed.czi:c:2/3 - Experiment-686-Deconvolution (defaults)-processed.cz	0.208	19231.3	15837	23823	0.627	0.422	89.154	0.906	3994.84	769253	1.488	0.672	0.889					0.031	8862.67	8568	9261	0.362	0.11	162.391	0.615	276.151	53176	3.306
	2	Experiment-686-Deconvolution (defaults)-processed.czi:c:1/3 - Experiment-686-Deconvolution (defaults)-processed.cz	1.111	16244.1	8560	39607	1.327	1.067	71.31	0.763	18052.6	3476241	1.244	0.804	0.886	1.04319					Experiment-686-Deconvolution (defaults)-processed.czi:c:2/3 - Experiment-686-Deconvolution (defaults)-processed.cz	0.867	21644.4	15677	31563	1.468	0.752	60.627	0.573	18771.2	3614612	1.952	0.512	0.786	4.16827	4.69886			0.431	40530.5	34484	48146	1.56	0.927	324.168	3.124	5495.64	1058248	7.866
		Experiment-686-Deconvolution (defaults)-processed.czi:c:1/3 - Experiment-686-Deconvolution (defaults)-processed.cz	1.065	19110.8	8620	61679	1.227	1.105	35.331	0.905	20345.3	3917714	1.11	0.901	0.915		1.127			2	Experiment-686-Deconvolution (defaults)-processed.czi:c:2/3 - Experiment-686-Deconvolution (defaults)-processed.cz	1.34	23874	15690	36544	1.86	0.917	172.948	0.595	31987.1	6159485	2.029	0.493	0.813	5.38153				0.992	15047.4	8554	35290	1.472	0.858	138.474	0.711	14925.4	2874060	1.716
	3	Experiment-686-Deconvolution (defaults)-processed.czi:c:1/3 - Experiment-686-Deconvolution (defaults)-processed.cz	1.101	17228.6	8590	55601	1.343	1.044	134.793	0.869	18967.8	3652460	1.287	0.777	0.922						Experiment-686-Deconvolution (defaults)-processed.czi:c:2/3 - Experiment-686-Deconvolution (defaults)-processed.cz	0.249	22277.4	16098	30206	0.644	0.493	50.613	0.924	5553.12	1069317	1.306	0.766	0.897		5.76021			1.574	17547	8558	40034	1.656	1.21	51.488	0.813	27610.6	5316741	1.369
		Experiment-686-Deconvolution (defaults)-processed.czi:c:1/3 - Experiment-686-Deconvolution (defaults)-processed.cz	0.846	18224.6	8598	44766	1.105	0.975	73.731	0.9	15426.8	2970603	1.133	0.883	0.903					3	Experiment-686-Deconvolution (defaults)-processed.czi:c:2/3 - Experiment-686-Deconvolution (defaults)-processed.cz	0.405	22744.4	15688	34617	0.949	0.543	3.909	0.817	9212.99	1774067	1.747	0.573	0.876					2.072	18928.9	8551	65535	1.725	1.529	73.087	0.899	39222	7552646	1.128
		Experiment-686-Deconvolution (defaults)-processed.czi:c:1/3 - Experiment-686-Deconvolution (defaults)-processed.cz	0.576	17085.8	8565	40685	0.874	0.84	7.372	0.923	9848.93	1896524	1.041	0.961	0.888						Experiment-686-Deconvolution (defaults)-processed.czi:c:2/3 - Experiment-686-Deconvolution (defaults)-processed.cz	0.956	24730.3	15737	35188	1.528	0.796	96.681	0.745	23630.7	4550371	1.918	0.521	0.895					0.166	10535.6	8712	14074	0.691	0.306	98.276	0.645	1750.81	337139	2.257
		Experiment-686-Deconvolution (defaults)-processed.czi:c:1/3 - Experiment-686-Deconvolution (defaults)-processed.cz	0.343	14046.6	8660	22330	0.844	0.517	168.011	0.808	4814.45	927077	1.633	0.613	0.863						Experiment-686-Deconvolution (defaults)-processed.czi:c:2/3 - Experiment-686-Deconvolution (defaults)-processed.cz	0.374	23520.2	15792	31766	0.732	0.65	133.172	0.895	8794.34	1693452	1.127	0.887	0.894					0.036	8924.29	8570	9273	0.299	0.155	8.35	1	324.416	62470	1.936
	4	Experiment-686-Deconvolution (defaults)-processed.czi:c:1/3 - Experiment-686-Deconvolution (defaults)-processed.cz	0.53	17922.9	8605	33168	0.895	0.753	68.286	0.943	9493.79	1828138	1.188	0.842	0.903						Experiment-686-Deconvolution (defaults)-processed.czi:c:2/3 - Experiment-686-Deconvolution (defaults)-processed.cz	0.862	29954.5	15756	53434	1.26	0.871	61.139	0.825	25822.6	4972442	1.446	0.692	0.902					0.358	12209.4	8575	17744	0.729	0.626	102.764	0.857	4374.95	842447	1.163
		Experiment-686-Deconvolution (defaults)-processed.czi:c:1/3 - Experiment-686-Deconvolution (defaults)-processed.cz	0.545	18927.5	8637	48233	0.869	0.799	27.464	0.873	10320.8	1987390	1.087	0.92	0.89	1.0283	1.08711			4	Experiment-686-Deconvolution (defaults)-processed.czi:c:2/3 - Experiment-686-Deconvolution (defaults)-processed.cz	0.187	20567.1	15879	26596	0.721	0.33	115.857	0.776	3845.08	740414	2.184	0.458	0.867					0.109	9852.24	8714	11751	0.653	0.212	151.159	0.69	1074.45	206897	3.075
	5	Experiment-686-Deconvolution (defaults)-processed.czi:c:1/3 - Experiment-686-Deconvolution (defaults)-processed.cz	0.597	15868	8575	35412	1.142	0.666	93.805	0.492	9476.54	1824817	1.714	0.583	0.726	1.22336	1.25554				Experiment-686-Deconvolution (defaults)-processed.czi:c:2/3 - Experiment-686-Deconvolution (defaults)-processed.cz	0.711	19898.9	15683	27541	1.57	0.577	140.107	0.485	14157.3	2726151	2.722	0.367	0.765	3.80214	3.68193			0.669	41521.5	34571	52842	2.372	1.299	360.549	3.192	7524.63	1448953	8.431
		Experiment-686-Deconvolution (defaults)-processed.czi:c:1/3 - Experiment-686-Deconvolution (defaults)-processed.cz	0.488	15461.8	8679	27345	0.935	0.665	48.044	0.909	7547.78	1453412	1.407	0.711	0.904					5	Experiment-686-Deconvolution (defaults)-processed.czi:c:2/3 - Experiment-686-Deconvolution (defaults)-processed.cz	0.228	18491.4	15702	22337	0.857	0.34	118.161	0.686	4225.25	813620	2.523	0.396	0.807					0.95	17400	8556	46569	1.124	1.077	33.29	0.901	16536	3184206	1.044
	6	Experiment-686-Deconvolution (defaults)-processed.czi:c:1/3 - Experiment-686-Deconvolution (defaults)-processed.cz	0.992	19323.9	8565	65535	1.139	1.108	71.212	0.919	19167.2	3690858	1.028	0.973	0.92	7.936	2.53944				Experiment-686-Deconvolution (defaults)-processed.czi:c:2/3 - Experiment-686-Deconvolution (defaults)-processed.cz	0.898	23016.9	15699	37221	1.551	0.738	22.471	0.675	20678.7	3981930	2.102	0.476	0.836	3.9386	4.89409			0.904	18419.1	8589	45141	1.099	1.047	63.133	0.907	16643.7	3204930	1.049
		Experiment-686-Deconvolution (defaults)-processed.czi:c:1/3 - Experiment-686-Deconvolution (defaults)-processed.cz	0.125	10200.1	8555	12702	0.655	0.242	115.635	0.649	1271.29	244802	2.706	0.37	0.762					6	Experiment-686-Deconvolution (defaults)-processed.czi:c:2/3 - Experiment-686-Deconvolution (defaults)-processed.cz	0.379	29041.7	16022	45105	0.798	0.605	173.251	0.894	11009.7	2120043	1.319	0.758	0.88					0.961	16605.3	8551	45591	1.315	0.93	137.58	0.799	15953.2	3071979	1.415
	7	Experiment-686-Deconvolution (defaults)-processed.czi:c:1/3 - Experiment-686-Deconvolution (defaults)-processed.cz	1.236	18990.3	8599	62534	1.26	1.249	103.575	0.866	23471.4	4519683	1.009	0.992	0.921	3.17738	3.65391				Experiment-686-Deconvolution (defaults)-processed.czi:c:2/3 - Experiment-686-Deconvolution (defaults)-processed.cz	0.769	34513.7	15780	65535	1.045	0.936	137.627	0.847	26526.7	5108027	1.116	0.896	0.914	2.02902	2.4094			0.956	19701.6	8602	55810	1.15	1.058	25.035	0.906	18825.7	3625102	1.088
		Experiment-686-Deconvolution (defaults)-processed.czi:c:1/3 - Experiment-686-Deconvolution (defaults)-processed.cz	0.389	16492.6	8575	29479	0.798	0.621	144.126	0.918	6423.63	1236944	1.286	0.778	0.904					7	Experiment-686-Deconvolution (defaults)-processed.czi:c:2/3 - Experiment-686-Deconvolution (defaults)-processed.cz	0.717	29139.2	15708	49901	1.089	0.838	11.106	0.918	20882.8	4021213	1.301	0.769	0.92	4.31928				1.309	19287.8	8587	57223	1.348	1.236	22.825	0.917	25241.4	4860513	1.09
	8	Experiment-686-Deconvolution (defaults)-processed.czi:c:1/3 - Experiment-686-Deconvolution (defaults)-processed.cz	0.826	14721.4	8586	29778	1.845	0.57	11.652	0.376	12155.7	2340710	3.237	0.309	0.654	1.62279	1.45089				Experiment-686-Deconvolution (defaults)-processed.czi:c:2/3 - Experiment-686-Deconvolution (defaults)-processed.cz	0.166	21391.2	15927	28713	0.588	0.36	143.895	0.914	3554.8	684518	1.633	0.612	0.853		5.87452			1.117	15931.1	8558	38366	1.538	0.924	120.222	0.798	17787.5	3425191	1.664
		Experiment-686-Deconvolution (defaults)-processed.czi:c:1/3 - Experiment-686-Deconvolution (defaults)-processed.cz	0.509	16462.2	8551	35421	0.841	0.77	24.467	0.889	8378.09	1613297	1.092	0.916	0.895					8	Experiment-686-Deconvolution (defaults)-processed.czi:c:2/3 - Experiment-686-Deconvolution (defaults)-processed.cz	0.774	33774.9	15714	58252	1.108	0.889	122.203	0.897	26134.3	5032455	1.245	0.803	0.903	2.09756				0.966	19309.8	8587	53490	1.118	1.1	141.28	0.946	18651.8	3591623	1.016
	9	Experiment-686-Deconvolution (defaults)-processed.czi:c:1/3 - Experiment-686-Deconvolution (defaults)-processed.cz	0.389	15184.4	8594	32494	0.853	0.581	10.518	0.932	5914.12	1138832	1.468	0.681	0.926	1.80206					Experiment-686-Deconvolution (defaults)-processed.czi:c:2/3 - Experiment-686-Deconvolution (defaults)-processed.cz	0.369	26907.1	15832	44835	0.756	0.621	5.546	0.951	9921	1910403	1.218	0.821	0.91		2.63424
		Experiment-686-Deconvolution (defaults)-processed.czi:c:1/3 - Experiment-686-Deconvolution (defaults)-processed.cz	0.701	17234.3	8572	42010	1.002	0.89	36.983	0.856	12082.5	2326629	1.126	0.888	0.877		2.043			9	Experiment-686-Deconvolution (defaults)-processed.czi:c:2/3 - Experiment-686-Deconvolution (defaults)-processed.cz	0.488	22280.1	15763	35018	0.965	0.644	137.256	0.458	10876.2	2094332	1.5	0.667	0.718	1.22				1.428	18461.1	8551	61085	1.372	1.325	6.365	0.841	26364.6	5076809	1.036
																					Experiment-686-Deconvolution (defaults)-processed.czi:c:2/3 - Experiment-686-Deconvolution (defaults)-processed.cz	0.4	24974.4	15797	36586	0.951	0.535	158.125	0.847	9986.56	1923027	1.778	0.562	0.906		1.08908			1.194	17062.1	8574	43889	1.414	1.075	151.17	0.837	20379.4	3924291	1.315
	1	Experiment-687-Deconvolution (defaults)-processed.czi:c:1/3 - Experiment-687-Deconvolution (defaults)-processed.cz	0.753	19652.7	8604	52182	1.04	0.922	59.467	0.929	14798.6	2849639	1.128	0.886	0.918	1.12388	1.27055																						1.142	15664.1	8586	29469	1.556	0.935	77.123	0.785	17896.1	3446108	1.664
		Experiment-687-Deconvolution (defaults)-processed.czi:c:1/3 - Experiment-687-Deconvolution (defaults)-processed.cz	0.602	18219.1	8568	44471	0.941	0.815	35.113	0.909	10975.3	2113414	1.155	0.866	0.903					1	Experiment-687-Deconvolution (defaults)-processed.czi:c:2/3 - Experiment-687-Deconvolution (defaults)-processed.cz	0.805	24307	15703	34734	1.216	0.843	50.79	0.792	19565.6	3767586	1.443	0.693	0.856	2.71959	3.28152			1.106	18418.5	8567	48258	1.213	1.161	85.977	0.874	20373.5	3923151	1.045
		Experiment-687-Deconvolution (defaults)-processed.czi:c:1/3 - Experiment-687-Deconvolution (defaults)-processed.cz	0.068	9956.39	8556	11727	0.316	0.272	135	1	672.165	129433	1.159	0.863	0.897						Experiment-687-Deconvolution (defaults)-processed.czi:c:2/3 - Experiment-687-Deconvolution (defaults)-processed.cz	0.296	20142.5	15720	26810	0.966	0.39	45.506	0.544	5962.37	1148122	2.477	0.404	0.704					1.646	18499.8	8556	57832	1.522	1.377	69.621	0.857	30454.8	5864427	1.105
			0.67	28175.5	17124	56198	1.257	1.087	170.113	1.909	11647.4	2242847	2.314	1.729	1.8					2	Experiment-687-Deconvolution (defaults)-processed.czi:c:2/3 - Experiment-687-Deconvolution (defaults)-processed.cz	0.872	24936.8	15693	41188	1.215	0.914	60.319	0.689	21756.1	4189379	1.33	0.752	0.846	4.29557	4.91808			1.407	16320.9	8557	61428	1.627	1.101	17.652	0.722	22969.1	4422973	1.477
	2	Experiment-687-Deconvolution (defaults)-processed.czi:c:1/3 - Experiment-687-Deconvolution (defaults)-processed.cz	0.078	9741.47	8727	11453	0.372	0.267	58.147	0.976	758.833	146122	1.392	0.718	0.882						Experiment-687-Deconvolution (defaults)-processed.czi:c:2/3 - Experiment-687-Deconvolution (defaults)-processed.cz	0.203	21841.9	15876	31113	0.722	0.357	173.806	0.75	4423.69	851833	2.022	0.495	0.876					0.093	11279.5	9223	14335	0.427	0.279	135	1	1054.37	203031	1.532
		Experiment-687-Deconvolution (defaults)-processed.czi:c:1/3 - Experiment-687-Deconvolution (defaults)-processed.cz	0.275	10116.2	8559	14045	0.8	0.438	84.425	0.475	2784.34	536156	1.826	0.548	0.667	3.52564	3.66924			3	Experiment-687-Deconvolution (defaults)-processed.czi:c:2/3 - Experiment-687-Deconvolution (defaults)-processed.cz	1.189	31974.5	15720	57454	1.319	1.148	149.121	0.882	38025.1	7322167	1.149	0.871	0.912	2.4617	2.79264			0.244	13534.2	8642	20783	0.604	0.514	127.136	0.947	3303.4	636107	1.175
	3	Experiment-687-Deconvolution (defaults)-processed.czi:c:1/3 - Experiment-687-Deconvolution (defaults)-processed.cz	0.685	15859.9	8665	33919	1.037	0.841	65.318	0.903	10871.9	2093512	1.233	0.811	0.904	1.22103	1.11653				Experiment-687-Deconvolution (defaults)-processed.czi:c:2/3 - Experiment-687-Deconvolution (defaults)-processed.cz	0.483	28193.1	15836	49303	1.046	0.588	142.709	0.808	13616.2	2621955	1.779	0.562	0.899					1.744	41134.6	26422	96546	2.658	1.894	279.788	2.669	27326.9	5262111	4.184
		Experiment-687-Deconvolution (defaults)-processed.czi:c:1/3 - Experiment-687-Deconvolution (defaults)-processed.cz	0.561	17361.2	8694	37926	0.935	0.764	69.185	0.883	9737.19	1875008	1.223	0.818	0.931					4	Experiment-687-Deconvolution (defaults)-processed.czi:c:2/3 - Experiment-687-Deconvolution (defaults)-processed.cz	0.753	32260.4	15859	62249	1.121	0.855	128.569	0.929	24292.3	4677760	1.31	0.763	0.918	2.16379	2.55695			1.387	16345.6	8560	53490	1.512	1.168	113.428	0.635	22664.3	4364273	1.295
	4	Experiment-687-Deconvolution (defaults)-processed.czi:c:1/3 - Experiment-687-Deconvolution (defaults)-processed.cz	0.841	16023	8807	39726	1.176	0.911	5.151	0.772	13480	2595724	1.29	0.775	0.859	1.26635					Experiment-687-Deconvolution (defaults)-processed.czi:c:2/3 - Experiment-687-Deconvolution (defaults)-processed.cz	0.348	27304.9	15834	44902	0.778	0.569	155.393	0.964	9500.48	1829427	1.367	0.732	0.937					1.091	18070.9	8587	52217	1.227	1.132	51.486	0.944	19707.4	3794881	1.084
		Experiment-687-Deconvolution (defaults)-processed.czi:c:1/3 - Experiment-687-Deconvolution (defaults)-processed.cz	1.065	20263.6	8557	65535	1.197	1.133	176.229	0.841	21572.5	4154028	1.057	0.946	0.907		1.60034			5	Experiment-687-Deconvolution (defaults)-processed.czi:c:2/3 - Experiment-687-Deconvolution (defaults)-processed.cz	0.104	16722.3	15748	18149	0.679	0.195	143.844	0.572	1736.83	334447	3.488	0.287	0.714		5.65299			1.288	16597	8592	40342	1.348	1.217	164.871	0.902	21375.3	4116064	1.108
	5	Experiment-687-Deconvolution (defaults)-processed.czi:c:1/3 - Experiment-687-Deconvolution (defaults)-processed.cz	1.459	17846.7	8636	45568	1.542	1.205	167.084	0.887	26043.2	5014915	1.28	0.781	0.934	1.22194	1.46546				Experiment-687-Deconvolution (defaults)-processed.czi:c:2/3 - Experiment-687-Deconvolution (defaults)-processed.cz	0.187	17669.7	15818	21853	0.761	0.313	147.953	0.726	3303.4	636108	2.436	0.411	0.791					1.667	15291.3	8563	31463	1.999	1.062	48.078	0.703	25490.5	4908496	1.882
		Experiment-687-Deconvolution (defaults)-processed.czi:c:1/3 - Experiment-687-Deconvolution (defaults)-processed.cz	1.194	14878.6	8609	29930	1.33	1.144	111.759	0.785	17771.3	3422074	1.163	0.86	0.865						Experiment-687-Deconvolution (defaults)-processed.czi:c:2/3 - Experiment-687-Deconvolution (defaults)-processed.cz	0.369	17669.3	15754	21800	0.875	0.536	49.876	0.307	6514.9	1254518	1.631	0.613	0.54					1.117	16061.1	8611	32524	1.369	1.039	32.313	0.882	17932.6	3453126	1.318
	6	Experiment-687-Deconvolution (defaults)-processed.czi:c:1/3 - Experiment-687-Deconvolution (defaults)-processed.cz	0.784	18230.4	8571	45111	1.182	0.845	149.276	0.855	14295.6	2752786	1.399	0.715	0.893							0.556	35338.9	31572	43653	1.636	0.849	197.829	1.033	9818.3	1890626	4.067	1.024	1.331	5.34615				1.044	17272.6	8561	52044	1.285	1.034	81.38	0.731	18029.6	3471799	1.243
		Experiment-687-Deconvolution (defaults)-processed.czi:c:1/3 - Experiment-687-Deconvolution (defaults)-processed.cz	1.054	16766.1	8569	40110	1.243	1.08	92.661	0.808	17675	3403527	1.151	0.868	0.883	1.34439	1.23639			6	Experiment-687-Deconvolution (defaults)-processed.czi:c:2/3 - Experiment-687-Deconvolution (defaults)-processed.cz	0.852	32881	15835	65535	1.155	0.939	45.268	0.897	28004	5392482	1.231	0.813	0.896	4.32487	6.80617
		Experiment-687-Deconvolution (defaults)-processed.czi:c:1/3 - Experiment-687-Deconvolution (defaults)-processed.cz	0.088	10465.9	8706	12884	0.41	0.274	155.098	1	923.965	177920	1.497	0.668	0.919						Experiment-687-Deconvolution (defaults)-processed.czi:c:2/3 - Experiment-687-Deconvolution (defaults)-processed.cz	0.197	20849.8	15797	26817	0.622	0.404	14.964	0.924	4114.49	792293	1.538	0.65	0.894
		Experiment-687-Deconvolution (defaults)-processed.czi:c:1/3 - Experiment-687-Deconvolution (defaults)-processed.cz	0.062	10497.8	8598	12636	0.333	0.238	119.055	0.851	654.201	125974	1.401	0.714	0.774					7	Experiment-687-Deconvolution (defaults)-processed.czi:c:2/3 - Experiment-687-Deconvolution (defaults)-processed.cz	0.649	18593.8	15742	25136	1.547	0.534	96.669	0.35	12070.1	2324230	2.897	0.345	0.594	6.97849	7.59155
	7		0.15	20963.7	17304	25520	0.743	0.512	274.153	1.851	1578.17	303894	2.898	1.382	1.693						Experiment-687-Deconvolution (defaults)-processed.czi:c:2/3 - Experiment-687-Deconvolution (defaults)-processed.cz	0.093	17008.9	15692	19411	0.387	0.308	128.474	1	1589.93	306160	1.257	0.795	0.857
		Experiment-687-Deconvolution (defaults)-processed.czi:c:1/3 - Experiment-687-Deconvolution (defaults)-processed.cz	0.727	14705.3	8554	25352	1.309	0.707	1.873	0.781	10691.3	2058739	1.852	0.54	0.878	4.84667	6.77453			8	Experiment-687-Deconvolution (defaults)-processed.czi:c:2/3 - Experiment-687-Deconvolution (defaults)-processed.cz	0.265	19777.9	15780	25155	0.714	0.472	72.994	0.859	5238.18	1008672	1.513	0.661	0.903	0.372714	3.20123
	8	Experiment-687-Deconvolution (defaults)-processed.czi:c:1/3 - Experiment-687-Deconvolution (defaults)-processed.cz	0.717	16747.7	8603	43074	1.069	0.853	113.213	0.789	12002.3	2311182	1.253	0.798	0.882		1.0716				Experiment-687-Deconvolution (defaults)-processed.czi:c:2/3 - Experiment-687-Deconvolution (defaults)-processed.cz	0.711	23569.3	15713	34990	1.117	0.811	15.511	0.878	16768.6	3228989	1.377	0.726	0.893
		Experiment-687-Deconvolution (defaults)-processed.czi:c:1/3 - Experiment-687-Deconvolution (defaults)-processed.cz	0.685	16339.1	8722	31267	0.981	0.89	139.685	0.815	11200.4	2156756	1.102	0.907	0.883	1.04672					Experiment-687-Deconvolution (defaults)-processed.czi:c:2/3 - Experiment-687-Deconvolution (defaults)-processed.cz	0.052	5347.6	4922	6096	0.286	0.231	90	1	277.709	53476	1.236	0.809	0.909
	9	Experiment-687-Deconvolution (defaults)-processed.czi:c:1/3 - Experiment-687-Deconvolution (defaults)-processed.cz	0.519	12262.9	8554	19191	0.924	0.715	166.703	0.807	6368.32	1226294	1.292	0.774	0.885		1.00487				Experiment-687-Deconvolution (defaults)-processed.czi:c:2/3 - Experiment-687-Deconvolution (defaults)-processed.cz	1.87	7878.15	4639	14756	1.762	1.351	132.265	0.436	14728.5	2836134	1.304	0.767	0.767
		Experiment-687-Deconvolution (defaults)-processed.czi:c:1/3 - Experiment-687-Deconvolution (defaults)-processed.cz	0.493	12845.9	8605	23249	1.127	0.558	71.753	0.754	6337.49	1220357	2.02	0.495	0.872	1.05274					Experiment-687-Deconvolution (defaults)-processed.czi:c:2/3 - Experiment-687-Deconvolution (defaults)-processed.cz	0.057	5119	4647	5700	0.353	0.206	127.875	0.976	292.421	56309	1.714	0.583	0.846
																				9		1.979	18344.8	14208	26552	2.401	1.788	350.14	2.412	15298.6	2945919	4.254	2.159	2.522	3.50265	4.07986
	1	Experiment-688-Deconvolution (defaults)-processed.czi:c:1/3 - Experiment-688-Deconvolution (defaults)-processed.cz	1.033	13987.9	8603	33127	1.49	0.883	44.981	0.486	14455.6	2783585	1.686	0.593	0.765	1.55338	1.15159				Experiment-687-Deconvolution (defaults)-processed.czi:c:2/3 - Experiment-687-Deconvolution (defaults)-processed.cz	0.062	5023.67	4635	5371	0.386	0.205	171.022	0.695	313.064	60284	1.881	0.532	0.706
		Experiment-688-Deconvolution (defaults)-processed.czi:c:1/3 - Experiment-688-Deconvolution (defaults)-processed.cz	0.665	18884.2	8559	38884	1.001	0.845	35.615	0.952	12552.7	2417174	1.184	0.844	0.911						Experiment-687-Deconvolution (defaults)-processed.czi:c:2/3 - Experiment-687-Deconvolution (defaults)-processed.cz	0.306	7241	4871	11802	0.845	0.462	61.27	0.803	2218.61	427219	1.83	0.546	0.881
		Experiment-688-Deconvolution (defaults)-processed.czi:c:1/3 - Experiment-688-Deconvolution (defaults)-processed.cz	0.093	10625.3	8911	13062	0.464	0.256	154.938	0.895	993.215	191255	1.81	0.552	0.878						Experiment-687-Deconvolution (defaults)-processed.czi:c:2/3 - Experiment-687-Deconvolution (defaults)-processed.cz	0.197	6172.63	4644	8242	0.565	0.445	90.845	0.974	1218.11	234560	1.271	0.787	0.905
		Experiment-688-Deconvolution (defaults)-processed.czi:c:1/3 - Experiment-688-Deconvolution (defaults)-processed.cz	0.452	13500	8761	19860	0.953	0.604	98.689	0.842	6099.34	1174497	1.579	0.633	0.897							0.565	18437.3	14150	25415	1.796	1.112	323.137	2.472	3749.78	722063	4.982	1.865	2.492
	2		0.545	24125.2	17672	32922	1.417	0.86	253.627	1.737	7092.55	1365752	3.389	1.185	1.775	1.0501
		Experiment-688-Deconvolution (defaults)-processed.czi:c:1/3 - Experiment-688-Deconvolution (defaults)-processed.cz	0.519	17087.5	8556	33652	0.881	0.751	73.57	0.896	8873.78	1708748	1.174	0.852	0.909		1.25114				Experiment-688-Deconvolution (defaults)-processed.czi:c:2/3 - Experiment-688-Deconvolution (defaults)-processed.cz	0.343	23587.9	16155	30915	0.784	0.557	32.463	0.934	8084.71	1556804	1.408	0.71	0.904
	3	Experiment-688-Deconvolution (defaults)-processed.czi:c:1/3 - Experiment-688-Deconvolution (defaults)-processed.cz	0.846	17700.6	8553	48378	1.097	0.983	57.672	0.841	14983.3	2885202	1.116	0.896	0.876						Experiment-688-Deconvolution (defaults)-processed.czi:c:2/3 - Experiment-688-Deconvolution (defaults)-processed.cz	0.171	24618.3	15689	39156	0.493	0.443	167.121	1	4218.93	812404	1.114	0.898	0.904
		Experiment-688-Deconvolution (defaults)-processed.czi:c:1/3 - Experiment-688-Deconvolution (defaults)-processed.cz	1.21	17927.6	8558	65535	1.323	1.165	66.811	0.705	21692.5	4177135	1.136	0.88	0.898	1.43026	1.44778			1		0.514	48206.2	31844	70071	1.277	1	199.584	1.934	12303.6	2369208	2.522	1.608	1.808
	4	Experiment-688-Deconvolution (defaults)-processed.czi:c:1/3 - Experiment-688-Deconvolution (defaults)-processed.cz	1.033	18586.4	8555	59853	1.19	1.106	52.863	0.852	19207.9	3698700	1.075	0.93	0.911	1.67152	2.20131				Experiment-688-Deconvolution (defaults)-processed.czi:c:2/3 - Experiment-688-Deconvolution (defaults)-processed.cz	1.111	31894	15692	65535	1.266	1.117	163.31	0.842	35444.9	6825321	1.133	0.883	0.92	2.16148	2.88085
		Experiment-688-Deconvolution (defaults)-processed.czi:c:1/3 - Experiment-688-Deconvolution (defaults)-processed.cz	0.618	14119.6	8609	25629	1.269	0.62	69.57	0.698	8725.67	1680227	2.045	0.489	0.829					2	Experiment-688-Deconvolution (defaults)-processed.czi:c:2/3 - Experiment-688-Deconvolution (defaults)-processed.cz	0.203	17339.7	15783	19818	0.615	0.419	97.529	0.608	3511.85	676247	1.466	0.682	0.743
	5	Experiment-688-Deconvolution (defaults)-processed.czi:c:1/3 - Experiment-688-Deconvolution (defaults)-processed.cz	0.587	19872.5	8566	42179	0.91	0.821	141.19	0.85	11661.7	2245597	1.109	0.902	0.876		1.44121				Experiment-688-Deconvolution (defaults)-processed.czi:c:2/3 - Experiment-688-Deconvolution (defaults)-processed.cz	0.914	27830.7	15857	51109	1.732	0.672	56.414	0.572	25437.1	4898209	2.577	0.388	0.834	4.50246	7.24322
		Experiment-688-Deconvolution (defaults)-processed.czi:c:1/3 - Experiment-688-Deconvolution (defaults)-processed.cz	0.592	13667.8	8661	23385	1.329	0.567	25.534	0.42	8091.59	1558128	2.343	0.427	0.763	1.00852					Experiment-688-Deconvolution (defaults)-processed.czi:c:2/3 - Experiment-688-Deconvolution (defaults)-processed.cz	0.369	30619.9	16716	51195	0.742	0.633	158.277	0.93	11290	2174015	1.172	0.854	0.91
	6	Experiment-688-Deconvolution (defaults)-processed.czi:c:1/3 - Experiment-688-Deconvolution (defaults)-processed.cz	1.937	17064.1	8556	45298	1.62	1.523	37.979	0.854	33053.8	6364895	1.064	0.94	0.921		2.26333				Experiment-688-Deconvolution (defaults)-processed.czi:c:2/3 - Experiment-688-Deconvolution (defaults)-processed.cz	0.099	19945.6	15963	25259	0.419	0.3	87.35	0.944	1968.03	378966	1.396	0.717	0.905
		Experiment-688-Deconvolution (defaults)-processed.czi:c:1/3 - Experiment-688-Deconvolution (defaults)-processed.cz	0.961	15201	8580	30768	1.252	0.977	158.464	0.752	14604.1	2812183	1.281	0.781	0.877	2.01561				3		0.468	50565.5	32679	76454	1.161	0.933	245.627	1.874	13258	2552981	2.568	1.571	1.815
	7	Experiment-688-Deconvolution (defaults)-processed.czi:c:1/3 - Experiment-688-Deconvolution (defaults)-processed.cz	0.93	17095.2	8558	44282	1.143	1.036	179.169	0.706	15891.2	3060039	1.103	0.906	0.85	1.09929	1.21282				Experiment-688-Deconvolution (defaults)-processed.czi:c:2/3 - Experiment-688-Deconvolution (defaults)-processed.cz	1.111	30349.1	15696	56011	1.305	1.084	2.143	0.87	33728	6494707	1.204	0.831	0.901	2.37393	2.54397
		Experiment-688-Deconvolution (defaults)-processed.czi:c:1/3 - Experiment-688-Deconvolution (defaults)-processed.cz	0.846	15479	8568	35325	1.296	0.831	61.564	0.704	13102.7	2523083	1.559	0.641	0.86					4	Experiment-688-Deconvolution (defaults)-processed.czi:c:2/3 - Experiment-688-Deconvolution (defaults)-processed.cz	0.608	26913.8	15714	41922	1.001	0.773	29.831	0.88	16352.8	3148917	1.294	0.773	0.893
	8	Experiment-688-Deconvolution (defaults)-processed.czi:c:1/3 - Experiment-688-Deconvolution (defaults)-processed.cz	0.353	13983.2	8633	24091	0.746	0.603	79.955	0.858	4937.94	950858	1.237	0.808	0.919						Experiment-688-Deconvolution (defaults)-processed.czi:c:2/3 - Experiment-688-Deconvolution (defaults)-processed.cz	1.08	27092.1	15756	46778	1.517	0.907	47.505	0.722	29264.2	5635159	1.672	0.598	0.851	1.77632	1.78955
		Experiment-688-Deconvolution (defaults)-processed.czi:c:1/3 - Experiment-688-Deconvolution (defaults)-processed.cz	0.852	13072.8	8572	24396	1.378	0.787	61.756	0.484	11133.8	2143945	1.751	0.571	0.718	2.4136	2.25475			5	Experiment-688-Deconvolution (defaults)-processed.czi:c:2/3 - Experiment-688-Deconvolution (defaults)-processed.cz	0.504	30792.6	15845	58848	0.922	0.696	109.166	0.869	15511.3	2986884	1.326	0.754	0.874
	9	Experiment-688-Deconvolution (defaults)-processed.czi:c:1/3 - Experiment-688-Deconvolution (defaults)-processed.cz	2.056	16571.8	8556	43586	2.083	1.257	62.376	0.706	34079.7	6562431	1.656	0.604	0.88	1.25749	1.47382				Experiment-688-Deconvolution (defaults)-processed.czi:c:2/3 - Experiment-688-Deconvolution (defaults)-processed.cz	1.085	31098.8	15806	61501	1.301	1.063	2.644	0.815	33753.6	6499645	1.224	0.817	0.909	2.15278	2.17606
		Experiment-688-Deconvolution (defaults)-processed.czi:c:1/3 - Experiment-688-Deconvolution (defaults)-processed.cz	1.49	14331.8	8580	33888	2.101	0.903	151.81	0.541	21360.6	4113233	2.326	0.43	0.82						Experiment-688-Deconvolution (defaults)-processed.czi:c:2/3 - Experiment-688-Deconvolution (defaults)-processed.cz	0.057	19241.3	16084	22073	0.316	0.23	105.071	1	1099.15	211654	1.372	0.729	0.957
		Experiment-688-Deconvolution (defaults)-processed.czi:c:1/3 - Experiment-688-Deconvolution (defaults)-processed.cz	0.145	12122.4	8561	16723	0.531	0.349	157.226	1	1762.7	339428	1.524	0.656	0.918						Experiment-688-Deconvolution (defaults)-processed.czi:c:2/3 - Experiment-688-Deconvolution (defaults)-processed.cz	0.976	22932.2	15814	34771	1.153	1.079	2.438	0.718	22388.9	4311247	1.069	0.936	0.87
			1.635	26454.3	17141	50611	2.632	1.252	309.036	1.541	23123.3	4452661	3.85	1.086	1.738						Experiment-688-Deconvolution (defaults)-processed.czi:c:2/3 - Experiment-688-Deconvolution (defaults)-processed.cz	0.898	20903	15682	36264	1.515	0.755	77.792	0.452	18779.5	3616215	2.008	0.498	0.695
																				6		1.931	63076.4	47580	93108	2.984	2.064	185.301	2.17	42267.6	8139116	4.449	2.163	2.522	2.41375
	1	Experiment-690-Deconvolution (defaults)-processed.czi:c:1/3 - Experiment-690-Deconvolution (defaults)-processed.cz	0.971	15612.1	8559	34968	1.388	0.891	74.431	0.603	15161.2	2919466	1.558	0.642	0.808	1.13302					Experiment-688-Deconvolution (defaults)-processed.czi:c:2/3 - Experiment-688-Deconvolution (defaults)-processed.cz	0.8	20237.8	15762	26476	1.342	0.759	15.845	0.588	16185.1	3116618	1.768	0.566	0.788		2.61152
		Experiment-690-Deconvolution (defaults)-processed.czi:c:1/3 - Experiment-690-Deconvolution (defaults)-processed.cz	0.857	18199.6	8553	40491	1.197	0.911	142.971	0.728	15594.7	3002934	1.314	0.761	0.875		1.02859				Experiment-688-Deconvolution (defaults)-processed.czi:c:2/3 - Experiment-688-Deconvolution (defaults)-processed.cz	0.119	18133.5	15781	21315	0.496	0.306	88.416	0.902	2165.91	417070	1.621	0.617	0.92
	2	Experiment-690-Deconvolution (defaults)-processed.czi:c:1/3 - Experiment-690-Deconvolution (defaults)-processed.cz	0.893	18085.9	8564	44915	1.136	1.001	156.197	0.839	16154.7	3110778	1.135	0.881	0.887						Experiment-688-Deconvolution (defaults)-processed.czi:c:2/3 - Experiment-688-Deconvolution (defaults)-processed.cz	0.088	16939.8	15712	18434	0.486	0.231	95.174	0.713	1495.5	287976	2.105	0.475	0.872
		Experiment-690-Deconvolution (defaults)-processed.czi:c:1/3 - Experiment-690-Deconvolution (defaults)-processed.cz	1.272	19057.5	8572	62149	1.395	1.161	178.31	0.769	24247.3	4669098	1.202	0.832	0.888	1.42441	1.50094				Experiment-688-Deconvolution (defaults)-processed.czi:c:2/3 - Experiment-688-Deconvolution (defaults)-processed.cz	0.093	16654.2	15716	18234	0.532	0.224	172.101	0.591	1556.78	299775	2.377	0.421	0.735
	3	Experiment-690-Deconvolution (defaults)-processed.czi:c:1/3 - Experiment-690-Deconvolution (defaults)-processed.cz	1.054	18165.7	8557	38547	1.326	1.013	90.472	0.858	19150.4	3687629	1.309	0.764	0.91	2.11222	2.67371				Experiment-688-Deconvolution (defaults)-processed.czi:c:2/3 - Experiment-688-Deconvolution (defaults)-processed.cz	0.057	17061.8	16002	18856	0.391	0.186	143.763	0.853	974.65	187680	2.1	0.476	0.759
		Experiment-690-Deconvolution (defaults)-processed.czi:c:1/3 - Experiment-690-Deconvolution (defaults)-processed.cz	0.499	14366.9	8568	26336	0.931	0.682	97.288	0.809	7162.49	1379219	1.366	0.732	0.869					7		0.357	68789.2	63211	76839	1.905	0.947	499.454	3.059	6192.83	1192501	8.203	1.989	3.286	1.49372
	4	Experiment-690-Deconvolution (defaults)-processed.czi:c:1/3 - Experiment-690-Deconvolution (defaults)-processed.cz	1.002	16044.7	8569	33631	1.554	0.821	134.735	0.622	16081.2	3096620	1.893	0.528	0.845						Experiment-688-Deconvolution (defaults)-processed.czi:c:2/3 - Experiment-688-Deconvolution (defaults)-processed.cz	0.078	16565.9	15679	18127	0.519	0.191	53.783	0.524	1290.44	248489	2.713	0.369	0.667
		Experiment-690-Deconvolution (defaults)-processed.czi:c:1/3 - Experiment-690-Deconvolution (defaults)-processed.cz	1.018	18894.5	8567	58859	1.169	1.109	34.806	0.839	19231.9	3703330	1.054	0.949	0.91	1.01597	1.19593				Experiment-688-Deconvolution (defaults)-processed.czi:c:2/3 - Experiment-688-Deconvolution (defaults)-processed.cz	0.161	18993.2	15699	22980	0.525	0.391	106.988	0.838	3057.66	588788	1.343	0.745	0.838
	5	Experiment-690-Deconvolution (defaults)-processed.czi:c:1/3 - Experiment-690-Deconvolution (defaults)-processed.cz	1.168	16137.7	8552	36261	1.294	1.15	144.794	0.745	18856.3	3630990	1.126	0.888	0.898	1.8748	1.91612					0.239	35559.1	31378	41107	1.044	0.582	160.771	1.362	4348.1	837277	4.056	1.114	1.505		1.42426
		Experiment-690-Deconvolution (defaults)-processed.czi:c:1/3 - Experiment-690-Deconvolution (defaults)-processed.cz	0.623	15791.4	8568	29011	1.066	0.745	142.504	0.834	9840.86	1894971	1.431	0.699	0.886					8	Experiment-688-Deconvolution (defaults)-processed.czi:c:2/3 - Experiment-688-Deconvolution (defaults)-processed.cz	0.883	23703.5	15757	33664	1.398	0.804	119.878	0.657	20926.3	4029600	1.739	0.575	0.833
	6	Experiment-690-Deconvolution (defaults)-processed.czi:c:1/3 - Experiment-690-Deconvolution (defaults)-processed.cz	0.893	16199.6	8554	38795	1.367	0.832	151.25	0.685	14469.8	2786325	1.643	0.609	0.843	1.57774	1.68376				Experiment-688-Deconvolution (defaults)-processed.czi:c:2/3 - Experiment-688-Deconvolution (defaults)-processed.cz	2.56	26834.8	15726	52520	2.382	1.369	161.228	0.576	68703.1	13229572	1.74	0.575	0.808	2.89921	3.2831
		Experiment-690-Deconvolution (defaults)-processed.czi:c:1/3 - Experiment-690-Deconvolution (defaults)-processed.cz	0.566	15181.8	8553	31413	0.997	0.723	147.82	0.891	8593.73	1654821	1.38	0.725	0.916
	7	Experiment-690-Deconvolution (defaults)-processed.czi:c:1/3 - Experiment-690-Deconvolution (defaults)-processed.cz	0.649	16970.5	8587	33046	0.975	0.848	176.354	0.801	11016.3	2121318	1.149	0.87	0.874					1	Experiment-690-Deconvolution (defaults)-processed.czi:c:2/3 - Experiment-690-Deconvolution (defaults)-processed.cz	0.452	14161	11330	19930	1.073	0.536	10.904	0.409	6398.01	1232010	2.002	0.499	0.677
		Experiment-690-Deconvolution (defaults)-processed.czi:c:1/3 - Experiment-690-Deconvolution (defaults)-processed.cz	1.044	16771.7	8562	44378	1.48	0.898	49.636	0.673	17506.7	3371110	1.648	0.607	0.857	1.60863	1.58916				Experiment-690-Deconvolution (defaults)-processed.czi:c:2/3 - Experiment-690-Deconvolution (defaults)-processed.cz	1.283	16376.2	11359	24139	1.961	0.833	33.326	0.398	21005.9	4044932	2.354	0.425	0.653	2.8385	3.2832
	8	Experiment-690-Deconvolution (defaults)-processed.czi:c:1/3 - Experiment-690-Deconvolution (defaults)-processed.cz	1.137	19365.1	8562	56818	1.361	1.064	66.364	0.837	22023.9	4240956	1.279	0.782	0.907		1.70248				Experiment-690-Deconvolution (defaults)-processed.czi:c:2/3 - Experiment-690-Deconvolution (defaults)-processed.cz	0.872	14823.5	11339	21375	1.115	0.996	35.847	0.71	12932.8	2490352	1.12	0.893	0.864
		Experiment-690-Deconvolution (defaults)-processed.czi:c:1/3 - Experiment-690-Deconvolution (defaults)-processed.cz	0.711	18182.9	8563	43697	1.005	0.901	130.686	0.833	12936.4	2491053	1.115	0.897	0.873	1.59916					Experiment-690-Deconvolution (defaults)-processed.czi:c:2/3 - Experiment-690-Deconvolution (defaults)-processed.cz	0.083	13084.1	11351	14965	0.37	0.286	113.827	0.772	1087.16	209346	1.297	0.771	0.744
	9	Experiment-690-Deconvolution (defaults)-processed.czi:c:1/3 - Experiment-690-Deconvolution (defaults)-processed.cz	1.044	19440.1	8557	55210	1.318	1.008	82.773	0.842	20292	3907457	1.307	0.765	0.889	1.89818	2.71476			2		0.955	27907.6	22690	36340	1.485	1.282	149.674	1.482	14019.9	2699698	2.417	1.664	1.608	2.58808	2.62894
		Experiment-690-Deconvolution (defaults)-processed.czi:c:1/3 - Experiment-690-Deconvolution (defaults)-processed.cz	0.55	13578.6	8671	23257	1.07	0.655	67.947	0.672	7474.68	1439336	1.633	0.612	0.806						Experiment-690-Deconvolution (defaults)-processed.czi:c:2/3 - Experiment-690-Deconvolution (defaults)-processed.cz	0.369	14463.6	11315	18164	0.988	0.475	114.217	0.77	5332.92	1026915	2.079	0.481	0.85
		Experiment-690-Deconvolution (defaults)-processed.czi:c:1/3 - Experiment-690-Deconvolution (defaults)-processed.cz	0.306	11941.7	8591	17048	0.844	0.462	69.318	0.722	3658.88	704560	1.825	0.548	0.814					3	Experiment-690-Deconvolution (defaults)-processed.czi:c:2/3 - Experiment-690-Deconvolution (defaults)-processed.cz	1.106	23961.9	11440	41377	1.381	1.02	109.041	0.821	26505.2	5103881	1.353	0.739	0.906	3.22449	3.86008
		Experiment-690-Deconvolution (defaults)-processed.czi:c:1/3 - Experiment-690-Deconvolution (defaults)-processed.cz	0.099	9217.42	8566	10785	0.675	0.186	124.022	0.543	909.481	175131	3.622	0.276	0.691						Experiment-690-Deconvolution (defaults)-processed.czi:c:2/3 - Experiment-690-Deconvolution (defaults)-processed.cz	0.343	20033.7	11362	33101	0.813	0.537	150.746	0.934	6866.49	1322221	1.514	0.661	0.898
		Experiment-690-Deconvolution (defaults)-processed.czi:c:1/3 - Experiment-690-Deconvolution (defaults)-processed.cz	0.114	9646.91	8689	11438	0.514	0.283	145.749	0.922	1102.15	212232	1.816	0.551	0.88					4	Experiment-690-Deconvolution (defaults)-processed.czi:c:2/3 - Experiment-690-Deconvolution (defaults)-processed.cz	1.023	23152.2	11394	52804	1.415	0.921	73.136	0.833	23685.9	4560987	1.537	0.651	0.904	2.16279	1.87374
		Experiment-690-Deconvolution (defaults)-processed.czi:c:1/3 - Experiment-690-Deconvolution (defaults)-processed.cz	0.14	10706.2	8663	12345	0.54	0.33	175.801	0.91	1501.17	289067	1.636	0.611	0.871						Experiment-690-Deconvolution (defaults)-processed.czi:c:2/3 - Experiment-690-Deconvolution (defaults)-processed.cz	0.473	26749	11358	60647	0.822	0.732	106.266	0.967	12641	2434162	1.122	0.892	0.933
	10		0.659	41512.2	34509	51616	2.573	1.261	514.89	3.097	7171.68	1380990	8.899	1.986	3.256	1.11318				5	Experiment-690-Deconvolution (defaults)-processed.czi:c:2/3 - Experiment-690-Deconvolution (defaults)-processed.cz	0.395	19554.2	11318	33260	0.904	0.556	9.586	0.77	7717.63	1486119	1.625	0.616	0.884		2.20244
		Experiment-690-Deconvolution (defaults)-processed.czi:c:1/3 - Experiment-690-Deconvolution (defaults)-processed.cz	0.436	13081.5	8567	25314	1.468	0.378	149.463	0.519	5706.49	1098850	3.879	0.258	0.771						Experiment-690-Deconvolution (defaults)-processed.czi:c:2/3 - Experiment-690-Deconvolution (defaults)-processed.cz	0.898	18919.6	11331	37787	1.234	0.927	25.869	0.642	16997.7	3273095	1.331	0.751	0.83	2.27342
		Experiment-690-Deconvolution (defaults)-processed.czi:c:1/3 - Experiment-690-Deconvolution (defaults)-processed.cz	0.156	10451.2	8556	13489	0.656	0.302	139.603	0.605	1628.24	313536	2.169	0.461	0.706						Experiment-690-Deconvolution (defaults)-processed.czi:c:2/3 - Experiment-690-Deconvolution (defaults)-processed.cz	0.171	15155.3	11486	21036	0.557	0.391	82.508	0.892	2597.23	500126	1.424	0.702	0.846
			0.592	23532.7	17123	38803	2.124	0.68	289.066	1.124	7334.73	1412386	6.048	0.719	1.477		1.02273				Experiment-690-Deconvolution (defaults)-processed.czi:c:2/3 - Experiment-690-Deconvolution (defaults)-processed.cz	0.452	13823.2	11316	18719	1.339	0.43	116.303	0.443	6245.39	1202621	3.118	0.321	0.696
	11	Experiment-690-Deconvolution (defaults)-processed.czi:c:1/3 - Experiment-690-Deconvolution (defaults)-processed.cz	1.111	15578.4	8574	35465	1.471	0.962	20.132	0.675	17312.8	3333787	1.529	0.654	0.858	1.64593	1.5777				Experiment-690-Deconvolution (defaults)-processed.czi:c:2/3 - Experiment-690-Deconvolution (defaults)-processed.cz	0.145	14913.2	11479	18844	0.556	0.333	90.234	0.867	2168.51	417571	1.668	0.6	0.848
		Experiment-690-Deconvolution (defaults)-processed.czi:c:1/3 - Experiment-690-Deconvolution (defaults)-processed.cz	0.192	15004	8812	25418	0.568	0.431	136.984	1	2882.96	555147	1.32	0.758	0.892					6		0.768	43891.8	34281	58599	2.452	1.154	289.045	2.202	11011.1	2120318	6.21	1.623	2.39	4.77019	4.30369
		Experiment-690-Deconvolution (defaults)-processed.czi:c:1/3 - Experiment-690-Deconvolution (defaults)-processed.cz	0.483	16751.9	8691	43004	0.87	0.707	129.53	0.808	8090.54	1557927	1.231	0.812	0.869						Experiment-690-Deconvolution (defaults)-processed.czi:c:2/3 - Experiment-690-Deconvolution (defaults)-processed.cz	0.161	15892.7	11323	23559	0.553	0.37	148.832	0.96	2558.53	492674	1.494	0.669	0.873
			0.675	31755.9	17503	68422	1.438	1.138	266.514	1.808	10973.5	2113074	2.551	1.57	1.761					7	Experiment-690-Deconvolution (defaults)-processed.czi:c:2/3 - Experiment-690-Deconvolution (defaults)-processed.cz	1.392	18721.4	11455	35703	2.282	0.777	114.983	0.415	26055.8	5017347	2.938	0.34	0.704	3.43704	2.85621
	12	Experiment-690-Deconvolution (defaults)-processed.czi:c:1/3 - Experiment-690-Deconvolution (defaults)-processed.cz	0.509	13993.1	8555	23874	1.066	0.608	160.062	0.781	7121.48	1371322	1.754	0.57	0.867						Experiment-690-Deconvolution (defaults)-processed.czi:c:2/3 - Experiment-690-Deconvolution (defaults)-processed.cz	0.405	22521.1	11358	44922	0.846	0.61	112.207	0.889	9122.5	1756642	1.387	0.721	0.891
		Experiment-690-Deconvolution (defaults)-processed.czi:c:1/3 - Experiment-690-Deconvolution (defaults)-processed.cz	0.841	18482.4	8578	56969	1.138	0.941	159.462	0.787	15549.1	2994153	1.209	0.827	0.885	1.65226	2.18341			8	Experiment-690-Deconvolution (defaults)-processed.czi:c:2/3 - Experiment-690-Deconvolution (defaults)-processed.cz	0.457	18890.5	11468	29292	0.893	0.652	139.919	0.922	8632.9	1662363	1.369	0.73	0.907		1.71601
	13	Experiment-690-Deconvolution (defaults)-processed.czi:c:1/3 - Experiment-690-Deconvolution (defaults)-processed.cz	0.815	17382.9	8568	38734	1.184	0.877	177.601	0.799	14172.7	2729113	1.35	0.741	0.88						Experiment-690-Deconvolution (defaults)-processed.czi:c:2/3 - Experiment-690-Deconvolution (defaults)-processed.cz	0.862	17184.6	11310	32828	1.412	0.778	159.473	0.616	14814.2	2852639	1.816	0.551	0.806	1.88621
		Experiment-690-Deconvolution (defaults)-processed.czi:c:1/3 - Experiment-690-Deconvolution (defaults)-processed.cz	1.21	18631.3	8580	65535	1.323	1.164	59.258	0.872	22543.9	4341094	1.137	0.88	0.928	1.48466	1.59066			9	Experiment-690-Deconvolution (defaults)-processed.czi:c:2/3 - Experiment-690-Deconvolution (defaults)-processed.cz	1.023	22463.8	11362	44938	1.555	0.838	139.523	0.762	22981.6	4425373	1.857	0.539	0.887	5.62088	9.26762
																					Experiment-690-Deconvolution (defaults)-processed.czi:c:2/3 - Experiment-690-Deconvolution (defaults)-processed.cz	0.182	13643.1	11327	16579	0.746	0.31	103.39	0.594	2479.77	477509	2.406	0.416	0.753
		Experiment-691-Deconvolution (defaults)-processed.czi:c:1/3 - Experiment-691-Deconvolution (defaults)-processed.cz	0.296	9194.95	5802	16647	0.789	0.477	133.564	0.839	2721.79	524112	1.654	0.605	0.864					10	Experiment-690-Deconvolution (defaults)-processed.czi:c:2/3 - Experiment-690-Deconvolution (defaults)-processed.cz	1.033	21895.2	11339	35932	1.329	0.99	87.493	0.849	22627.3	4357154	1.342	0.745	0.923	2.16109	2.32746
		Experiment-691-Deconvolution (defaults)-processed.czi:c:1/3 - Experiment-691-Deconvolution (defaults)-processed.cz	0.171	8743.64	5993	12980	0.606	0.36	115.692	0.892	1498.43	288540	1.684	0.594	0.857						Experiment-690-Deconvolution (defaults)-processed.czi:c:2/3 - Experiment-690-Deconvolution (defaults)-processed.cz	0.478	20348.5	11541	33192	1.057	0.576	179.867	0.809	9721.9	1872064	1.836	0.545	0.911
	1		0.467	17938.6	11795	29627	1.395	0.837	249.256	1.731	4220.22	812652	3.338	1.199	1.721						Experiment-690-Deconvolution (defaults)-processed.czi:c:2/3 - Experiment-690-Deconvolution (defaults)-processed.cz	0.265	6531.06	5403	8129	0.882	0.382	40.235	0.624	1729.75	333084	2.308	0.433	0.767
		Experiment-691-Deconvolution (defaults)-processed.czi:c:1/3 - Experiment-691-Deconvolution (defaults)-processed.cz	0.696	11724.8	5765	31695	1.081	0.82	115.566	0.556	8159.1	1571128	1.318	0.759	0.795	1.49036	1.93333				Experiment-690-Deconvolution (defaults)-processed.czi:c:2/3 - Experiment-690-Deconvolution (defaults)-processed.cz	0.171	7233.94	5399	10059	0.571	0.382	130.143	0.892	1239.71	238720	1.494	0.669	0.846
	2	Experiment-691-Deconvolution (defaults)-processed.czi:c:1/3 - Experiment-691-Deconvolution (defaults)-processed.cz	0.644	12612.5	5793	30951	0.987	0.831	0.356	0.872	8121.84	1563953	1.187	0.842	0.886		1.18559			11		0.436	13765	10802	18188	1.453	0.764	170.378	1.516	2969.46	571804	3.802	1.102	1.613		6.84596
		Experiment-691-Deconvolution (defaults)-processed.czi:c:1/3 - Experiment-691-Deconvolution (defaults)-processed.cz	0.66	10386.9	5892	21172	0.958	0.877	166.952	0.893	6850.48	1319139	1.092	0.916	0.898	1.02484					Experiment-690-Deconvolution (defaults)-processed.czi:c:2/3 - Experiment-690-Deconvolution (defaults)-processed.cz	0.379	7912.56	5465	10758	0.996	0.485	14.099	0.803	2999.65	577617	2.053	0.487	0.874
	3	Experiment-691-Deconvolution (defaults)-processed.czi:c:1/3 - Experiment-691-Deconvolution (defaults)-processed.cz	0.846	11281.9	5771	25450	1.145	0.941	76.587	0.802	9549.96	1838955	1.216	0.822	0.867	1.13863	1.13435				Experiment-690-Deconvolution (defaults)-processed.czi:c:2/3 - Experiment-690-Deconvolution (defaults)-processed.cz	0.01	5451.5	5413	5490	0.187	0.071	135	0.785	56.621	10903	2.646	0.378	0.667
		Experiment-691-Deconvolution (defaults)-processed.czi:c:1/3 - Experiment-691-Deconvolution (defaults)-processed.cz	0.743	11336.7	5841	27171	1.282	0.738	101.975	0.771	8418.86	1621148	1.737	0.576	0.885						Experiment-690-Deconvolution (defaults)-processed.czi:c:2/3 - Experiment-690-Deconvolution (defaults)-processed.cz	0.01	5484	5439	5529	0.163	0.081	0	1	56.958	10968	2	0.5	1
	4	Experiment-691-Deconvolution (defaults)-processed.czi:c:1/3 - Experiment-691-Deconvolution (defaults)-processed.cz	0.213	7297.34	6155	8709	0.683	0.397	1.24	0.902	1553.74	299191	1.723	0.58	0.953						Experiment-690-Deconvolution (defaults)-processed.czi:c:2/3 - Experiment-690-Deconvolution (defaults)-processed.cz	0.244	6614.36	5404	8392	0.826	0.376	170.664	0.733	1614.42	310875	2.195	0.456	0.839
		Experiment-691-Deconvolution (defaults)-processed.czi:c:1/3 - Experiment-691-Deconvolution (defaults)-processed.cz	1.158	11457.5	5768	28103	1.286	1.147	51.497	0.888	13268.6	2555020	1.122	0.892	0.923	5.43662	8.53976				Experiment-690-Deconvolution (defaults)-processed.czi:c:2/3 - Experiment-690-Deconvolution (defaults)-processed.cz	0.073	6261.36	5648	7134	0.476	0.195	122.197	0.75	455.226	87659	2.445	0.409	0.824
	5	Experiment-691-Deconvolution (defaults)-processed.czi:c:1/3 - Experiment-691-Deconvolution (defaults)-processed.cz	0.389	8767.08	5769	14277	1.018	0.487	56.947	0.605	3414.66	657531	2.091	0.478	0.739						Experiment-690-Deconvolution (defaults)-processed.czi:c:2/3 - Experiment-690-Deconvolution (defaults)-processed.cz	1.994	7595.12	5401	13674	2.171	1.169	30.209	0.519	15145.9	2916526	1.857	0.539	0.799
		Experiment-691-Deconvolution (defaults)-processed.czi:c:1/3 - Experiment-691-Deconvolution (defaults)-processed.cz	0.945	10000.3	5772	16934	1.289	0.934	15.716	0.779	9451.8	1820052	1.38	0.724	0.858	2.42931	2.76801					2.71	39318.9	32770	50977	4.819	2.377	472.169	4.59	20328.8	3914548	13.196	2.769	5.003	6.2156
	6	Experiment-691-Deconvolution (defaults)-processed.czi:c:1/3 - Experiment-691-Deconvolution (defaults)-processed.cz	0.073	6543.64	5799	7341	0.385	0.24	118.945	0.993	475.749	91611	1.604	0.623	0.848					12	Experiment-690-Deconvolution (defaults)-processed.czi:c:2/3 - Experiment-690-Deconvolution (defaults)-processed.cz	2.477	11008.5	5914	20796	1.974	1.598	96.896	0.787	27269.5	5251056	1.236	0.809	0.916
		Experiment-691-Deconvolution (defaults)-processed.czi:c:1/3 - Experiment-691-Deconvolution (defaults)-processed.cz	0.846	9749.41	5800	19326	1.685	0.64	65.29	0.461	8252.71	1589154	2.633	0.38	0.715	11.589	17.3468				Experiment-690-Deconvolution (defaults)-processed.czi:c:2/3 - Experiment-690-Deconvolution (defaults)-processed.cz	0.28	8776.13	5925	12520	0.755	0.473	139.367	0.933	2461.09	473911	1.598	0.626	0.923
	7	Experiment-691-Deconvolution (defaults)-processed.czi:c:1/3 - Experiment-691-Deconvolution (defaults)-processed.cz	0.893	11942.4	5784	25120	1.259	0.903	70.641	0.82	10667.2	2054089	1.395	0.717	0.889		1.20325				Experiment-690-Deconvolution (defaults)-processed.czi:c:2/3 - Experiment-690-Deconvolution (defaults)-processed.cz	0.312	8028.77	5951	10921	0.914	0.434	152.748	0.762	2501.67	481726	2.106	0.475	0.833
		Experiment-691-Deconvolution (defaults)-processed.czi:c:1/3 - Experiment-691-Deconvolution (defaults)-processed.cz	1.117	11495.7	5801	30743	1.228	1.157	96.48	0.693	12835.3	2471584	1.061	0.942	0.843	1.25084						0.592	16804.9	11876	23441	1.669	0.907	292.115	1.695	4962.76	955637	3.704	1.101	1.756	4.18412	5.49482
	8	Experiment-691-Deconvolution (defaults)-processed.czi:c:1/3 - Experiment-691-Deconvolution (defaults)-processed.cz	0.919	10293.1	5773	19882	1.351	0.866	18.78	0.717	9461.29	1821880	1.561	0.641	0.868
		Experiment-691-Deconvolution (defaults)-processed.czi:c:1/3 - Experiment-691-Deconvolution (defaults)-processed.cz	1.033	10268	5785	21236	1.469	0.896	32.585	0.602	10611.3	2043337	1.64	0.61	0.801	1.12405	1.12155				Experiment-691-Deconvolution (defaults)-processed.czi:c:2/3 - Experiment-691-Deconvolution (defaults)-processed.cz	1.137	11210.4	7425	17048	1.509	0.959	132.972	0.698	12749.5	2455068	1.573	0.636	0.873
	9	Experiment-691-Deconvolution (defaults)-processed.czi:c:1/3 - Experiment-691-Deconvolution (defaults)-processed.cz	0.846	9244.29	5767	19973	1.164	0.926	42.136	0.473	7825.13	1506819	1.257	0.796	0.698	1.13102					Experiment-691-Deconvolution (defaults)-processed.czi:c:2/3 - Experiment-691-Deconvolution (defaults)-processed.cz	0.016	7902.33	7514	8404	0.17	0.116	135	1	123.114	23707	1.464	0.683	0.857
		Experiment-691-Deconvolution (defaults)-processed.czi:c:1/3 - Experiment-691-Deconvolution (defaults)-processed.cz	0.748	11503.1	5830	21063	1.032	0.922	67.729	0.836	8602.14	1656440	1.119	0.894	0.878		1.0993			1		1.153	19112.7	14939	25452	1.679	1.075	267.972	1.698	12872.6	2478775	3.037	1.319	1.73	1.91528	1.24701
	10	Experiment-691-Deconvolution (defaults)-processed.czi:c:1/3 - Experiment-691-Deconvolution (defaults)-processed.cz	0.504	10382.4	5772	17363	1.055	0.608	125.637	0.832	5229.96	1007089	1.735	0.576	0.886						Experiment-691-Deconvolution (defaults)-processed.czi:c:2/3 - Experiment-691-Deconvolution (defaults)-processed.cz	0.602	17136	7437	34009	0.935	0.821	134.996	0.92	10322.8	1987772	1.139	0.878	0.924
		Experiment-691-Deconvolution (defaults)-processed.czi:c:1/3 - Experiment-691-Deconvolution (defaults)-processed.cz	0.94	9995.12	5788	26934	1.875	0.638	150.497	0.538	9395	1809116	2.938	0.34	0.826	1.86508	1.79638			2	Experiment-691-Deconvolution (defaults)-processed.czi:c:2/3 - Experiment-691-Deconvolution (defaults)-processed.cz	0.556	15732.5	7414	31127	0.909	0.778	141.075	0.901	8742.05	1683381	1.168	0.856	0.892		3.17192
	11	Experiment-691-Deconvolution (defaults)-processed.czi:c:1/3 - Experiment-691-Deconvolution (defaults)-processed.cz	1.709	13480.8	5765	51183	1.725	1.261	156.22	0.703	23032.6	4435187	1.367	0.731	0.893	1.21897	1.36116				Experiment-691-Deconvolution (defaults)-processed.czi:c:2/3 - Experiment-691-Deconvolution (defaults)-processed.cz	1.641	16897.3	7435	34969	1.521	1.374	162.728	0.857	27729	5339546	1.108	0.903	0.907	2.95144
		Experiment-691-Deconvolution (defaults)-processed.czi:c:1/3 - Experiment-691-Deconvolution (defaults)-processed.cz	1.402	12068.1	5769	35936	1.379	1.295	121.539	0.894	16921.3	3258395	1.064	0.939	0.92		1.0392			3	Experiment-691-Deconvolution (defaults)-processed.czi:c:2/3 - Experiment-691-Deconvolution (defaults)-processed.cz	1.376	11820.9	7429	20186	1.801	0.973	69.149	0.629	16267.7	3132527	1.852	0.54	0.876	2.75752	3.00074
	12	Experiment-691-Deconvolution (defaults)-processed.czi:c:1/3 - Experiment-691-Deconvolution (defaults)-processed.cz	0.67	12329.4	5766	31897	0.974	0.876	28.873	0.827	8259.68	1590496	1.112	0.899	0.893	1.02446					Experiment-691-Deconvolution (defaults)-processed.czi:c:2/3 - Experiment-691-Deconvolution (defaults)-processed.cz	0.499	10874.2	7447	18264	0.939	0.676	96.089	0.639	5421.23	1043919	1.388	0.72	0.828
		Experiment-691-Deconvolution (defaults)-processed.czi:c:1/3 - Experiment-691-Deconvolution (defaults)-processed.cz	0.654	12146.8	5768	29470	1.073	0.776	72.008	0.778	7948.11	1530499	1.382	0.724	0.866					4	Experiment-691-Deconvolution (defaults)-processed.czi:c:2/3 - Experiment-691-Deconvolution (defaults)-processed.cz	1.428	13839.4	7417	34736	1.47	1.237	144.691	0.751	19764.3	3805845	1.188	0.842	0.883	2.21739	2.16913
	13	Experiment-691-Deconvolution (defaults)-processed.czi:c:1/3 - Experiment-691-Deconvolution (defaults)-processed.cz	0.348	11109.1	5765	20795	0.7	0.633	133.762	0.948	3865.31	744310	1.105	0.905	0.905						Experiment-691-Deconvolution (defaults)-processed.czi:c:2/3 - Experiment-691-Deconvolution (defaults)-processed.cz	0.644	14149.6	7438	24863	1.029	0.796	18.01	0.882	9111.65	1754552	1.293	0.774	0.905
		Experiment-691-Deconvolution (defaults)-processed.czi:c:1/3 - Experiment-691-Deconvolution (defaults)-processed.cz	0.483	11122.4	5940	24090	0.877	0.701	163.214	0.975	5371.69	1034380	1.251	0.799	0.916	1.38793	1.38972			5	Experiment-691-Deconvolution (defaults)-processed.czi:c:2/3 - Experiment-691-Deconvolution (defaults)-processed.cz	0.68	15279.3	7472	31653	1.045	0.829	122.142	0.872	10394.5	2001589	1.26	0.793	0.9		2.67384
	14	Experiment-691-Deconvolution (defaults)-processed.czi:c:1/3 - Experiment-691-Deconvolution (defaults)-processed.cz	0.904	12004.8	5765	31158	1.168	0.985	53.179	0.829	10847.7	2088841	1.186	0.843	0.89	1.33926	1.33924				Experiment-691-Deconvolution (defaults)-processed.czi:c:2/3 - Experiment-691-Deconvolution (defaults)-processed.cz	1.657	16777.2	7444	39013	1.637	1.289	38.16	0.828	27793.4	5351935	1.27	0.787	0.902	2.43676
		Experiment-691-Deconvolution (defaults)-processed.czi:c:1/3 - Experiment-691-Deconvolution (defaults)-processed.cz	0.675	11997.9	5891	34560	0.974	0.882	12.843	0.856	8099.88	1559724	1.104	0.906	0.893					6	Experiment-691-Deconvolution (defaults)-processed.czi:c:2/3 - Experiment-691-Deconvolution (defaults)-processed.cz	1.672	17442.2	7415	47015	1.481	1.438	119.301	0.792	29166.7	5616376	1.03	0.971	0.89	2.61659	3.77435
	15	Experiment-691-Deconvolution (defaults)-processed.czi:c:1/3 - Experiment-691-Deconvolution (defaults)-processed.cz	0.789	10985.6	5789	25719	1.181	0.851	138.342	0.748	8671.57	1669810	1.388	0.72	0.874	4.48295	7.23087				Experiment-691-Deconvolution (defaults)-processed.czi:c:2/3 - Experiment-691-Deconvolution (defaults)-processed.cz	0.483	12861.3	7467	23034	1.038	0.592	120.798	0.774	6211.52	1196099	1.752	0.571	0.845
		Experiment-691-Deconvolution (defaults)-processed.czi:c:1/3 - Experiment-691-Deconvolution (defaults)-processed.cz	0.083	6909.38	6032	7636	0.419	0.252	63.937	0.958	574.102	110550	1.662	0.602	0.889						Experiment-691-Deconvolution (defaults)-processed.czi:c:2/3 - Experiment-691-Deconvolution (defaults)-processed.cz	0.156	9731.3	7553	12810	0.502	0.395	100.254	0.857	1516.08	291939	1.268	0.788	0.833
		Experiment-691-Deconvolution (defaults)-processed.czi:c:1/3 - Experiment-691-Deconvolution (defaults)-processed.cz	0.093	6687.67	5790	8244	0.456	0.261	107.821	0.687	625.141	120378	1.749	0.572	0.735							0.639	22592.6	15020	35844	1.54	0.987	221.052	1.631	7727.6	1488038	3.02	1.359	1.678
			0.176	13597	11822	15880	0.875	0.513	171.758	1.645	1199.24	230928	3.411	1.174	1.624					7	Experiment-691-Deconvolution (defaults)-processed.czi:c:2/3 - Experiment-691-Deconvolution (defaults)-processed.cz	1.937	12460.5	7443	24338	1.992	1.238	20.261	0.639	24136.5	4647765	1.61	0.621	0.829	2.68283	3.12342
	16	Experiment-691-Deconvolution (defaults)-processed.czi:c:1/3 - Experiment-691-Deconvolution (defaults)-processed.cz	1.028	10827.7	5774	31545	1.312	0.998	148.527	0.855	11133.5	2143892	1.315	0.76	0.917	2.67708					Experiment-691-Deconvolution (defaults)-processed.czi:c:2/3 - Experiment-691-Deconvolution (defaults)-processed.cz	0.722	13416.2	7431	26892	1.355	0.678	111.549	0.749	9684.43	1864849	1.996	0.501	0.911
		Experiment-691-Deconvolution (defaults)-processed.czi:c:1/3 - Experiment-691-Deconvolution (defaults)-processed.cz	0.384	8449.32	5799	14451	0.866	0.565	83.126	0.706	3247.01	625250	1.533	0.652	0.8		3.42886			8	Experiment-691-Deconvolution (defaults)-processed.czi:c:2/3 - Experiment-691-Deconvolution (defaults)-processed.cz	1.672	17412.2	7478	49559	1.798	1.184	170.069	0.714	29116.6	5606736	1.519	0.658	0.866	2.09	3.00654
																1.89355					Experiment-691-Deconvolution (defaults)-processed.czi:c:2/3 - Experiment-691-Deconvolution (defaults)-processed.cz	0.8	14284.6	7420	25298	1.256	0.811	11.802	0.802	11424	2199825	1.548	0.646	0.898
																1.69108				9	Experiment-691-Deconvolution (defaults)-processed.czi:c:2/3 - Experiment-691-Deconvolution (defaults)-processed.cz	0.639	11968.7	7449	21119	1.198	0.679	15.75	0.776	7645.07	1472146	1.764	0.567	0.875		1.4943
																					Experiment-691-Deconvolution (defaults)-processed.czi:c:2/3 - Experiment-691-Deconvolution (defaults)-processed.cz	1.267	19660.9	7428	52060	1.399	1.154	74.497	0.87	24912.8	4797255	1.212	0.825	0.926	1.98279
																				10	Experiment-691-Deconvolution (defaults)-processed.czi:c:2/3 - Experiment-691-Deconvolution (defaults)-processed.cz	1.418	20809.1	7429	57003	1.413	1.277	150.454	0.911	29501.7	5680893	1.107	0.904	0.938		1.51886
																					Experiment-691-Deconvolution (defaults)-processed.czi:c:2/3 - Experiment-691-Deconvolution (defaults)-processed.cz	2.555	17537.6	7414	43070	1.99	1.635	7.104	0.841	44809.1	8628504	1.218	0.821	0.926	1.80183
																				11	Experiment-691-Deconvolution (defaults)-processed.czi:c:2/3 - Experiment-691-Deconvolution (defaults)-processed.cz	0.602	14942.1	7413	27277	1.021	0.752	86.268	0.909	9001.18	1733280	1.358	0.736	0.906		2.94409
																					Experiment-691-Deconvolution (defaults)-processed.czi:c:2/3 - Experiment-691-Deconvolution (defaults)-processed.cz	1.677	15798.6	7436	30103	1.534	1.392	30.009	0.756	26500.3	5102934	1.102	0.908	0.881	2.78571
																				12	Experiment-691-Deconvolution (defaults)-processed.czi:c:2/3 - Experiment-691-Deconvolution (defaults)-processed.cz	1.496	13675.3	7518	28870	1.721	1.107	55.836	0.643	20453.1	3938473	1.555	0.643	0.815	2.42071	2.73117
																					Experiment-691-Deconvolution (defaults)-processed.czi:c:2/3 - Experiment-691-Deconvolution (defaults)-processed.cz	0.618	12118	7508	18187	1.127	0.698	24.948	0.846	7488.76	1442046	1.614	0.62	0.902
																				13	Experiment-691-Deconvolution (defaults)-processed.czi:c:2/3 - Experiment-691-Deconvolution (defaults)-processed.cz	1.76	12771.2	7414	21936	2.159	1.038	3.709	0.607	22483.4	4329437	2.08	0.481	0.839	6.79537	10.3943
																					Experiment-691-Deconvolution (defaults)-processed.czi:c:2/3 - Experiment-691-Deconvolution (defaults)-processed.cz	0.062	8404	7498	9633	0.319	0.249	37.238	1	523.718	100848	1.281	0.781	0.857
																					Experiment-691-Deconvolution (defaults)-processed.czi:c:2/3 - Experiment-691-Deconvolution (defaults)-processed.cz	0.197	8307.18	7421	10594	0.778	0.323	0.758	0.645	1639.34	315673	2.411	0.415	0.784
																						0.259	16711.2	14919	20227	1.097	0.572	37.996	1.645	2163.05	416521	3.692	1.196	1.641
																				14	Experiment-691-Deconvolution (defaults)-processed.czi:c:2/3 - Experiment-691-Deconvolution (defaults)-processed.cz	0.55	15720.5	7454	30963	0.898	0.781	145.947	0.831	8653.73	1666374	1.149	0.87	0.88		2.63561
																					Experiment-691-Deconvolution (defaults)-processed.czi:c:2/3 - Experiment-691-Deconvolution (defaults)-processed.cz	1.272	17926.1	7426	50697	1.52	1.066	41.903	0.874	22807.8	4391904	1.426	0.701	0.925	2.31273
[truncated: 25 more columns]

## Sheet: Fig.S4h
SNUL-1	associate with SNRPN	not associate with SNRPN	association rate
1	65	1	98.5
2	89	2	97.8
3	73	3	96
		average	97.4333
		sd	1.2897
		se	0.74461

## Sheet: Fig.S4j
SNRPN associates with	smaller 15Sat III	larger 15Sat III
	85(94.4%)	5(5.6%)
