# Supplementary material for: Monoallelically expressed noncoding RNAs form nucleolar territories on NOR-containing chromosomes and regulate rRNA expression
Source: eLife journal article supplement (doi:10.7554/elife.80684), 2024-01-19
Supplement: supp [file Figure 4-Source Data 1.xlsx]

## Sheet: Fig.4d
MCH065	SNUL-1 associates with smaller 15SatIII	not associate	associateion rate
	53	0	1
	67	0	1
	60	0	1

## Sheet: Fig.4f
sample 1	associate	not associate	Total	sample2	associate	not associate	Total	sample3	associate	not associate	Total		average association rate	sd
image 1	0	3	3		0	2	2		0	4	4		0.759908	0.0145263
image 2	0	2	2		1	1	2		1	2	3
image 3	1	0	1		0	1	1		0	2	2
image 4	0	2	2		1	4	5		0	1	1
image 5	0	2	2		2	2	4		1	2	3
image 6	0	1	1		2	4	6		2	1	3
image 7	2	3	5		2	0	2		0	2	2
image 8	1	1	2		1	2	3		1	3	4
image 9	0	3	3		0	1	1		1	3	4
image 10	1	3	4		0	4	4		0	3	3
image 11	1	1	2		1	2	3		0	1	1
image 12	1	0	1		0	2	2		1	3	4
image 13	0	3	3		0	2	2		1	3	4
image 14	1	3	4		0	1	1		1	1	2
image 15	8	27	35		0	1	1		1	2	3
image 16	0.228571	0.771429			10	29	39		1	2	3
image 17					0.25641	0.74359			0	3	3
image 18									0	1	1
image 19									1		1
image 20									12	39	51
									0.235294	0.764706

## Sheet: Fig.4h
Ctrl
	1 SNUL-1 Cloud	2 SNUL-1 Clouds
	74	1
	51	4
	52	7
5-Aza+TSA
	1 SNUL-1 Cloud	2 SNUL-1 Clouds
	88	24
	59	25
	70	19
Column B	Aza+TSA
vs.	vs.
Column A	Ctr
Unpaired t test with Welch's correction
P value	0.0139
P value summary	*
Significantly different (P < 0.05)?	Yes
One- or two-tailed P value?	Two-tailed
Welch-corrected t, df	t=4.199, df=3.969
