# Supplementary material for: Monoallelically expressed noncoding RNAs form nucleolar territories on NOR-containing chromosomes and regulate rRNA expression
Source: eLife journal article supplement (doi:10.7554/elife.80684), 2024-01-19
Supplement: supp [file Figure 5-figure supplement 1-Source Data 1.xlsx]

## Sheet: WI38
Scr	Area	Mean	Min	Max	IntDen	RawIntDen		78528.2		ASO901	Area	Mean	Min	Max	IntDen	RawIntDen		79864.4		scr	ASO901	Median		Rank		R1	R2	N1	N2	U1	U2	U	z	p
1	164.924	733.838	422	2218	121027	23305220		79845.5		1	130.696	894.477	475	3338	116905	22511305		80021.1		78528.2	79864.4	120434	132761	1	3	5957	11063	72	112	4735	525585	4735	1.99381	0.0461723
2	5.993	456.922	412	522	2738.28	527288		80183.2		2	208.474	811.984	509	2607	169277	32596290		80279.1		79845.5	80021.1			2	4
3	233.671	711.043	424	2098	166150	31994071		82053.4		3	196.379	808.687	450	2705	158809	30580493		83020.9		80183.2	80279.1			5	6
4	214.051	615.466	413	1852	131741	25368297		82234.9		4	209.003	1030.42	503	4102	215361	41470216		83207.7		82053.4	83020.9			7	9
5	261.418	706.735	431	2053	184753	35576343		84124.2		5	214.207	780.59	466	2801	167208	32197787		84861.3		82234.9	83207.7			8	10
6	259.673	668.319	396	2190	173544	33417951		89532.4		6	141.119	990.198	530	3170	139735	26907648		87431.8		84124.2	84861.3			11	12
7	220.776	589.012	402	1750	130040	25040685		89696.2		7	153.951	935.311	526	3221	143992	27727287		90748.3		89532.4	87431.8			14	13
8	234.434	628.782	427	1959	147408	28385111		90250.1		8	155.81	850.89	530	2597	132577	25529267		94800.9		89696.2	90748.3			15	17
9	216.066	659.902	406	2022	142582	27455891		90861.9		9	214.139	767.745	459	2138	164404	31657968		95599		90250.1	94800.9			16	21
10	254.303	601.631	383	2132	152997	29461270		90964.6		10	151.91	765.89	498	2213	116346	22403826		96400.6		90861.9	95599			18	24
11	215.038	689.142	407	2270	148192	28535994		93664										98451.8		90964.6	96400.6			19	25
12	265.557	641.561	415	1856	170371	32806888		95300.7		11	151.702	814.265	456	2411	123526	23786295		98880.8		93664	98451.8			20	28
13	214.778	542.066	393	4842	116424	22418779		95562.8		12	153.265	715.382	458	1858	109643	21113078		98929.3		95300.7	98880.8			22	29
								96403.2		13	174.417	1069.54	483	3114	186546	35921480		98941		95562.8	98929.3			23	30
14	206.074	581.826	395	1677	119899	23088005		97510.7		14	183.443	755.209	469	2604	138538	26677013		99546.9		96403.2	98941			26	31
15	137.25	584.214	393	1435	80183.2	15440192		99318.5		15	131.62	786.055	476	2338	103461	19922555		100026		97510.7	99546.9			27	34
16	220.906	621.687	346	2002	137334	26445302		99516.8		16	193.959	669.987	400	1957	129950	25023344		100771		99318.5	100026			32	35
17	163.309	722.059	402	1907	117919	22706595		101253										101174		99516.8	100771			33	36
18	168.632	566.695	377	1442	95562.8	18401722		101782		17	162.551	899.299	651	2037	146182	28148963		101236		101253	101174			39	37
19	212.426	549.731	343	1559	116777	22486739		102717		18	143.632	753.204	540	1749	108184	20832107		101510		101782	101236			42	38
20	167.572	687.607	406	1878	115224	22187709		103039		19	201.504	794.877	532	4301	160171	30842816		101602		102717	101510			47	40
21	235.281	575.609	338	1789	135430	26078523		104126		20	102.965	779.678	587	1627	80279.1	15458670		102111		103039	101602			48	41
22	197.433	820.063	445	2584	161908	31177151		105102		21	123.098	822.402	571	2116	101236	19494209		102138		104126	102111			50	43
23	248.045	822.353	375	2555	203981	39278847		107633		22	145.657	1095.74	713	2708	159602	30733279		102414		105102	102138			51	44
								108710		23	128.375	917.096	683	2058	117732	22670601		102650		107633	102414			53	45
24	291.548	759.996	416	2581	221576	42666920		108826		24	211.642	826.909	540	2120	175008	33699857		103461		108710	102650			55	46
25	167.619	642.126	400	1830	107633	20725892		109153		25	147.262	905.182	608	2408	133299	25668250		105440		108826	103461			56	49
26	161.99	628.326	410	1944	101782	19599362		113201		26	188.74	859.233	606	2219	162171	31227951		108184		109153	105440			57	52
27	207.767	716.139	419	2325	148790	28651283		115224		27	128.302	771.158	575	1656	98941	19052229		109548		113201	108184			64	54
28	55.53	467.927	407	1234	25984.1	5003546		116424		28	126.043	789.786	625	1526	99546.9	19168890		109580		115224	109548			66	58
29	202.216	595.166	377	1671	120352	23175175		116777		29	275.346	1045.36	660	2545	287837	55426238		109584		116424	109580			68	59
30	152.118	652.905	434	2120	99318.5	19124907		117919		30	138.808	945.791	651	1713	131283	25280044		109643		116777	109584			69	60
31	210.463	777.012	430	2345	163532	31489979		119891		31	193.06	1026.98	665	2241	198270	38179154		111101		117919	109643			72	61
32	243.481	584.973	377	1810	142430	27426482		119899		32	147.776	832.697	645	1884	123053	23695237		112682		119891	111101			77	62
33	198.15	571.291	391	1711	113201	21798180		120352		33	133.724	819.212	633	1631	109548	21094701		113532		119899	112682			78	63
11	59.119	469.376	387	1169	27749	5343379		120434										116346		120352	113532			79	65
12	135.141	602.364	397	1755	81404.2	15675321		120661		34	163.273	759.947	485	2144	124078	23892734		116905		120434	116346			80	67
34	194.26	1071.74	784	2924	109153	21018700		121027		35	321.819	932.308	514	3018	300035	57775133		117732		120661	116905			82	70
35	166.949	651.852	413	1796	108826	20955730		126778		3	94.822	717.278	479	2355	68013.5	13096773		118216		121027	117732			83	71
								127793		4	86.045	896.241	516	2519	77117.3	14849819		118418		126778	118216			90	73
36	269.592	587.087	358	1819	158274	30477443		130040		36	180.867	1613.52	995	4874	145131	27946592		119011		127793	118418			91	74
37	180.031	572.338	374	1838	103039	19841253		131741		37	300.081	884.812	475	2830	265515	51128003		119079		130040	119011			95	75
38	337.539	667.982	385	1952	225470	43416820		133744		38	252.304	968.578	497	3591	244376	47057374		120466		131741	119079			97	76
39	165.931	548.206	384	1474	90964.6	17516271		135430		39	148.057	1052.88	532	3032	155886	30017618		121999		133744	120466			103	81
40	166.664	492.329	340	1317	82053.4	15800317		137334										122039		135430	121999			104	84
41	181.308	525.628	377	1356	95300.7	18351247		138001		40	214.955	697.153	411	4096	149856	28856547		123053		137334	122039			106	85
42	204.688	531.104	366	1501	108710	20933445		139980		41	161.045	611.332	347	2085	98451.8	18958014		123526		138001	123053			109	86
43	179.672	499.221	362	1280	89696.2	17272038		141639		42	201.032	765.714	404	3101	153933	29641552		124078		139980	123526			113	87
								142430		43	307.891	812.123	435	2583	250046	48149176		126664		141639	124078			114	88
44	251.437	677.186	413	1896	170269	32787310		142582		44	182.248	618.29	357	2257	112682	21698280		128004		142430	126664			115	89
45	401.274	853.6	419	2417	342528	65957680		143807		45	233.577	570.681	332	3919	133298	25668074		129747		142582	128004			116	92
46	221.161	689.444	417	1908	152478	29361335		146585		46	201.78	627.733	363	1921	126664	24390584		129950		143807	129747			118	93
47	239.731	611.456	408	1832	146585	28226641		147408		47	170.595	927.267	387	2157	158187	30460714		131283		146585	129950			123	94
48	171.379	530.181	382	1187	90861.9	17496509		148192		48	186.122	635.152	357	2748	118216	22763838		131790		147408	131283			124	96
49	230.924	579.17	371	1498	133744	25753959		148790		49	176.905	669.392	395	2104	118418	22802835		132577		148192	131790			125	98
50	192.162	541.863	379	1431	104126	20050571		152478		50	192.868	568.182	349	1966	109584	21101711		132761		148790	132577			126	99
51	196.083	722.343	436	1644	141639	27274245		152997		51	183.905	551.972	333	1832	101510	19546981		133298		152478	132761			129	100
52	181.734	496.605	368	1155	90250.1	17378694		158274		52	182.015	553.644	333	1812	100771	19404685		133299		152997	133298			131	101
								161908		53	159.887	592.926	341	1843	94800.9	18255010		136338		158274	133299			137	102
53	187.14	531.777	359	1481	99516.8	19163099		163532										137526		161908	136338			143	105
54	207.627	494.719	345	1310	102717	19779359		166150		54	187.634	634.274	400	1641	119011	22916969		137781		163532	137526			146	107
55	186.138	564.643	374	1403	105102	20238508		168922		55	178.385	717.571	414	2176	128004	24648572		138538		166150	137781			148	108
56	192.837	621.724	410	1803	119891	23086473		170269		56	117.511	851.205	535	2392	100026	19261064		139268		168922	138538			151	110
57	170.694	481.769	343	1102	82234.9	15835264		170371		57	313.926	851.3	457	2271	267245	51461103		139735		170269	139268			153	111
58	200.513	480.784	346	1244	96403.2	18563537		173544		58	184.393	831.877	465	3861	153392	29537455		143645		170371	139735			154	112
59	186.849	521.868	350	1266	97510.7	18776813		184753		59	135.281	712.592	424	2173	96400.6	18563034		143992		173544	143645			156	117
60	183.661	487.487	362	1218	89532.4	17240481		203981		60	144.707	604.199	416	1802	87431.8	16835998		145131		184753	143992			162	119
61	162.764	482.468	348	1178	78528.2	15121513		215788		61	153.317	795.992	467	2437	122039	23500086		146182		203981	145131			167	120
62	177.793	526.816	373	1243	93664	18036071		221576		62	220.413	602.33	362	1891	132761	25564674		146272		215788	146182			170	121
63	169.51	471.039	334	1164	79845.5	15375172		225470		63	133.344	622.605	403	1920	83020.9	15986628		149856		221576	146272			171	122
64	209.98	657.211	404	1548	138001	26573670		342528		64	207.586	704.634	409	1959	146272	28166315		152238		225470	149856			173	127
										65	140.791	568.367	372	1646	80021.1	15408985		152508		342528	152238			182	128
65	168.196	759.785	431	2090	127793	24607912												153392			152508				130
66	208.858	607.008	413	1809	126778	24412632				66	152.305	667.096	449	1684	101602	19564582		153933			153392				132
67	139.171	604.466	404	1475	84124.2	16199074				67	223.871	588.687	432	1408	131790	25377712		154846			153933				133
68	222.817	645.403	379	2060	143807	27691658				68	175.383	624.806	436	1885	109580	21100948		155886			154846				134
69	170.543	593.711	396	1610	101253	19497462				69	183.339	830.364	466	2278	152238	29315180		158187			155886				135
70	199.479	846.813	467	2658	168922	32527783				70	157.55	627.925	452	1593	98929.3	19049978		158809			158187				136
71	214.337	562.952	364	1707	120661	23234737				71	189.799	756.827	459	1986	143645	27660517		159602			158809				138
72	251.468	858.112	400	2733	215788	41552362				72	204.278	746.571	459	2046	152508	29367135		160171			159602				139
73	168.092	716.478	417	1981	120434	23190962				73	237.903	675.5	429	3549	160704	30945318		160704			160171				140
74	235.426	594.581	355	1840	139980	26954749				74	153.686	590.479	387	1380	90748.3	17474621		161543			160704				141
										75	201.338	598.327	400	1698	120466	23197130		162121			161543				142
										76	273.57	645.889	437	1802	176696	34024778		162171			162121				144
										77	225.58	816.197	500	2431	184118	35453960		164404			162171				145
										78	156.651	631.216	475	1583	98880.8	19040630		166806			164404				147
										79	312.752	864.588	481	2672	270402	52068928		167208			166806				149
																		169277			167208				150
										80	123.566	773.669	403	2715	95599	18408682		171962			169277				152
										81	195.252	664.511	363	2410	129747	24984287		175008			171962				155
										82	223.368	851.799	431	3529	190264	36637591		175638			175008				157
										83	323.736	846.271	442	2796	273968	52755707		176696			175638				158
										84	203.493	684.386	384	2655	139268	26817663		178147			176696				159
										85	268.429	640.625	350	3874	171962	33113242		184118			178147				160
										86	214.103	643.524	376	2008	137781	26531219		185602			184118				161
										87	29.554	455.746	347	855	13469.2	2593649		186546			185602				163
										88	448.87	868.956	413	2640	390048	75108187		190264			186546				164
										89	202.751	678.3	364	3561	137526	26482181		198270			190264				165
										90	192.126	709.628	418	2408	136338	26253397		214366			198270				166
										91	208.494	585.141	364	3599	121999	23492240		215361			214366				168
										92	195.589	568.03	346	1909	111101	21393720		224208			215361				169
										93	196.057	579.075	357	1987	113532	21861806		244376			224208				172
																		250046			244376				174
										94	271.176	1324.77	502	4571	359246	69176932		265515			250046				175
										95	172.947	964.488	515	3018	166806	32120329		267245			265515				176
										96	64.971	1229.22	600	2718	79864.4	15378816		270402			267245				177
										97	204.278	758.015	428	2306	154846	29817293		273968			270402				178
										98	76.08	1329.85	591	3336	101174	19482229		287837			273968				179
										99	3.692	706.934	626	820	2610.23	502630		300035			287837				180
										100	147.345	1259.64	540	3634	185602	35739872		359246			300035				181
										101	193.05	839.79	443	2534	162121	31218353		390048			359246				183
										102	146.312	697.902	442	2267	102111	19662697					390048				184
										103	135.23	779.71	428	2901	105440	20303653
										104	141.165	723.533	456	2329	102138	19667794
										105	133.474	892.151	425	2698	119079	22930072
										106	130.052	787.486	472	2441	102414	19721013
										107	324.546	660.512	380	1861	214366	41278722
										108	292.862	599.729	401	1866	175638	33821108
										109	322.79	694.593	416	2241	224208	43173814
										110	259.839	685.607	384	3359	178147	34304331
										111	142.443	595.757	381	1883	84861.3	16341023
										112	162.156	633.03	395	1716	102650	19766376
										113	130.779	636.247	390	1864	83207.7	16022598
										114	190.505	847.972	449	2060	161543	31106987

## Sheet: HTD114
SCR	5'ETS-2 intensity							ASO		5'ETS-2 intensity					Mann-Whitney test	scr	ASO	Rank		R1	R2	N1	N2	U1	U2	U	z	p
1	0.055	12.001	7	17	0.654	58876		1	0.135	29.329	17	53	3.956	356059		58876	356059	23	100	1747	3923	56	50	2649	129802	2649	7.90464	2.66454e-15
2	0.025	12.497	8	19	0.308	27731		2	0.085	31.123	18	59	2.633	236968		27731	236968	7	83
3	0.074	15.107	8	28	1.124	101140		3	0.083	25.289	18	50	2.103	189235		101140	189235	51	76
4	0.057	13.529	7	26	0.773	69552		4	0.053	25.239	18	42	1.34	120644		69552	120644	29	59
5	0.103	15.114	8	32	1.563	140638		5	0.042	23.522	18	40	0.992	89265		140638	89265	65	43
6	0.089	14.298	7	23	1.269	114242		6	0.049	26.409	18	46	1.29	116119		114242	116119	55	56
7	0.064	12.746	8	19	0.821	73888		7	0.139	24.832	17	43	3.447	310249		73888	310249	32	94
8	0.032	12.043	8	19	0.384	34551		8	0.041	24.563	18	45	1.001	90096		34551	90096	10	44
9	0.001	12.389	9	18	0.018	1623		1	0.12	27.746	13	49	3.333	299959		1623	299959	1	92
10	0.02	11.863	8	19	0.238	21437		2	0.113	30.412	15	62	3.448	310327		21437	310327	3	95
11	0.089	13.321	8	24	1.188	106938		3	0.056	32.02	16	47	1.783	160454		106938	160454	54	68
12	0.053	14.267	7	25	0.76	68409		4	0.086	30.786	14	54	2.662	239609		68409	239609	26	84
13	0.055	15.216	7	27	0.837	75319		5	0.151	26.575	13	45	4.008	360753		75319	360753	34	101
14	0.069	15.169	8	30	1.046	94110		6	0.066	26.847	15	51	1.767	158985		94110	158985	46	67
15	0.091	15.945	7	34	1.456	131024		7	0.139	26.259	14	54	3.647	328259		131024	328259	64	97
16	0.098	13.735	8	34	1.35	121503		1	0.103	26.442	16	44	2.731	245777		121503	245777	60	87
17	0.048	13.604	7	59	0.653	58768		2	0.137	24.747	15	49	3.386	304710		58768	304710	21	93
18	0.079	14.667	8	32	1.155	103971		3	0.312	26.074	15	63	8.13	731732		103971	731732	53	106
19	0.076	12.615	7	22	0.957	86086		4	0.115	25.795	16	47	2.956	266021		86086	266021	42	89
20	0.058	13.149	8	25	0.761	68469		5	0.163	23.968	15	49	3.898	350819		68469	350819	27	99
21	0.058	13.149	8	25	0.761	68469		6	0.088	24.854	15	41	2.179	196075		68469	196075	27	77
22	0.04	12.996	7	24	0.524	47200		7	0.146	21.76	16	39	3.174	285616		47200	285616	14	91
23	0.068	12.991	7	23	0.879	79103		1	0.092	27.264	21	41	2.499	224901		79103	224901	38	80
24	0.016	16.821	8	36	0.268	24155		2	0.022	25.78	21	55	0.572	51509		24155	51509	4	16
25	0.052	13.769	8	49	0.714	64234		3	0.038	27.951	21	46	1.062	95592		64234	95592	25	47
26	0.045	14.183	8	28	0.635	57185		4	0.07	27.492	20	48	1.93	173724		57185	173724	20	72
27	0.048	13.556	8	27	0.653	58777		5	0.067	27.936	21	47	1.872	168481		58777	168481	22	69
28	0.055	15.643	8	28	0.854	76871		6	0.07	27.926	19	74	1.96	176438		76871	176438	35	74
29	0.033	16.15	8	32	0.525	47270		7	0.159	35.599	21	77	5.659	509308		47270	509308	15	104
30	0.033	13.23	7	26	0.443	39861		8	0.058	29.466	21	64	1.698	152809		39861	152809	12	66
31	0.025	12.935	8	22	0.32	28832		9	0.072	30.451	22	47	2.203	198236		28832	198236	8	78
32	0.02	15.745	9	37	0.308	27711		10	0.109	28.157	21	44	3.073	276531		27711	276531	6	90
1	0.04	14.988	10	25	0.595	53583		11	0.182	30.1	21	47	5.484	493602		53583	493602	18	103
2	0.088	15.139	10	34	1.335	120175		12	0.053	25.572	20	36	1.367	123001		120175	123001	58	61
3	0.023	17.075	11	31	0.401	36062		13	0.092	28.048	21	42	2.59	233104		36062	233104	11	82
4	0.056	19.235	11	56	1.086	97714		1	0.045	25.05	19	40	1.116	100477		97714	100477	48	50
5	0.058	14.976	10	34	0.873	78551		2	0.21	28.733	19	57	6.022	541994		78551	541994	37	105
6	0.151	16.802	10	86	2.538	228420		3	0.066	28.635	19	48	1.884	169578		228420	169578	81	71
7	0.072	16.115	10	33	1.154	103893		4	0.103	26.133	19	52	2.694	242466		103893	242466	52	86
8	0.05	16.033	10	36	0.795	71556		5	0.092	29.222	19	59	2.691	242164		71556	242164	31	85
9	0.046	15.059	10	30	0.696	62631		6	0.069	29.975	19	59	2.065	185844		62631	185844	24	75
10	0.016	13.56	10	24	0.215	19337		7	0.143	30.304	19	61	4.324	389138		19337	389138	2	102
11	0.043	14.074	10	27	0.605	54466		8	0.093	26.323	19	47	2.442	219824		54466	219824	19	79
12	0.055	14.106	10	27	0.774	69698		9	0.109	26.489	19	49	2.897	260756		69698	260756	30	88
13	0.089	15.48	10	34	1.374	123641		10	0.073	25.724	19	51	1.876	168851		123641	168851	62	70
14	0.04	14.738	11	27	0.583	52510		11	0.038	23.845	19	72	0.899	80931		52510	80931	17	39
15	0.027	17.923	11	40	0.489	44020		12	0.127	28.463	19	60	3.617	325535		44020	325535	13	96
16	0.069	16.012	10	41	1.107	99595		13	0.074	26.208	19	48	1.943	174834		99595	174834	49	73
17	0.086	15.416	10	50	1.329	119601		14	0.054	26.487	19	46	1.436	129231		119601	129231	57	63
18	0.028	13.043	10	22	0.361	32478		15	0.122	30.671	19	52	3.736	336248		32478	336248	9	98
19	0.056	16.491	11	31	0.927	83412								243857		83412		41
20	0.067	15.607	10	29	1.04	93640										93640		45
21	0.062	14.973	10	29	0.923	83054										83054		40
22	0.021	13.506	10	24	0.28	25161										25161		5
23	0.057	14.471	10	27	0.825	74223										74223		33
24	0.058	14.819	10	30	0.855	76939										76939		36
						72898.3

## Sheet: RPE1
SCR	5'ETS-2 intensity							ASO		5'ETS-2 intensity					Mann-Whitney test	scr	ASO	Rank		R1	R2	N1	N2	U1	U2	U	z	p
	Area	Mean	Min	Max	IntDen	RawIntDen			Area	Mean	Min	Max	IntDen	RawIntDen		163055	422721	62	73	1538	1702	54	26	1351	33775	1351	6.66667	2.61664e-11
1	0.079	22.811	12	50	1.812	163055		1	0.128	36.64	13	82	4.697	422721		77433	239881	39	66
2	0.038	22.386	13	39	0.86	77433		2	0.082	32.659	13	69	2.665	239881		58930	174295	28	63
3	0.03	21.484	13	41	0.655	58930		3	0.079	24.456	12	48	1.937	174295		37333	79280	18	41
4	0.021	19.334	13	34	0.415	37333		4	0.043	20.657	13	39	0.881	79280		19915	192461	3	64
5	0.012	17.909	14	27	0.221	19915		5	0.076	28.266	13	63	2.138	192461		43151	143605	21	58
6	0.024	19.677	13	33	0.479	43151		6	0.058	27.322	13	53	1.596	143605		30490	455576	10	74
7	0.018	19.032	13	38	0.339	30490		1	0.085	59.748	33	86	5.062	455576		31421	307792	12	69
8	0.018	18.883	13	33	0.349	31421		2	0.053	65.1	31	86	3.42	307792		50177	246071	23	67
9	0.025	22.036	13	40	0.558	50177		3	0.04	67.602	33	86	2.734	246071		75728	80603	38	42
10	0.037	22.518	13	50	0.841	75728		4	0.02	43.925	32	67	0.896	80603		69409	324093	34	71
11	0.034	22.492	13	52	0.771	69409		5	0.064	56.227	32	85	3.601	324093		121882	112882	55	51
12	0.059	23.044	13	52	1.354	121882		6	0.03	42.31	33	62	1.254	112882		24462	312501	6	70
13	0.014	18.86	14	29	0.272	24462		1	0.056	61.955	27	86	3.472	312501		82798	1028799	44	79
1	0.041	22.275	12	48	0.92	82798		2	0.174	65.772	25	86	11.431	1028799		98941	1211606	49	80
2	0.05	21.997	11	49	1.099	98941		3	0.206	65.369	26	86	13.462	1211606		114473	413430	53	72
3	0.061	20.859	11	42	1.272	114473		4	0.069	66.553	26	86	4.594	413430		50092	755001	22	78
4	0.028	20.231	11	36	0.557	50092		5	0.135	62.104	26	86	8.389	755001		58531	731660	27	77
5	0.034	19.072	12	41	0.65	58531		1	0.183	44.426	12	86	8.13	731660		120699	102490	54	50
6	0.063	21.224	10	52	1.341	120699		2	0.046	24.943	13	54	1.139	102490		65644	618270	32	76
7	0.037	19.701	11	42	0.729	65644		3	0.16	43.046	13	86	6.87	618270		73633	248730	36	68
8	0.045	18.231	11	39	0.818	73633		4	0.107	25.727	13	56	2.764	248730		37901	129466	19	57
9	0.022	19.074	11	33	0.421	37901		1	0.039	37.332	19	78	1.439	129466		98920	146578	48	60
10	0.054	20.544	11	42	1.099	98920		2	0.048	33.875	19	67	1.629	146578		42375	533370	20	75
11	0.027	17.317	11	32	0.471	42375		3	0.121	49.055	19	86	5.926	533370		35074	206593	15	65
12	0.02	19.145	12	36	0.39	35074		4	0.067	34.495	19	72	2.295	206593		17928	123094	1	56
13	0.012	15.993	12	24	0.199	17928		5	0.05	27.336	18	62	1.368	123094		31572		13
14	0.02	17.159	11	30	0.351	31572										71454		35
15	0.039	20.139	11	35	0.794	71454										35390		16
16	0.02	20.028	11	38	0.393	35390										62371		31
1	0.094	7.349	1	20	0.693	62371										34751		14
2	0.067	5.755	1	13	0.386	34751										22992		5
3	0.059	4.333	1	30	0.255	22992										30715		11
4	0.076	4.504	1	15	0.341	30715										20154		4
5	0.054	4.141	1	14	0.224	20154										36237		17
6	0.072	5.609	1	21	0.403	36237										113362		52
7	0.129	9.766	1	31	1.26	113362										87901		45
8	0.125	7.786	1	28	0.977	87901										30390		9
9	0.058	5.867	1	16	0.338	30390										65794		33
10	0.087	8.419	1	30	0.731	65794										59560		29
11	0.091	7.242	1	24	0.662	59560										98757		47
12	0.116	9.486	1	30	1.097	98757										144457		59
13	0.181	8.862	1	30	1.605	144457										18069		2
14	0.034	5.853	1	20	0.201	18069										147914		61
1	0.08	20.601	11	47	1.643	147914										74523		37
2	0.044	18.626	11	38	0.828	74523										82724		43
3	0.043	21.249	11	40	0.919	82724										89530		46
4	0.045	22.232	11	55	0.995	89530										61629		30
5	0.041	16.638	10	31	0.685	61629										58328		26
6	0.033	19.652	11	41	0.648	58328										56749		25
7	0.034	18.419	11	33	0.631	56749										78301		40
8	0.049	17.844	11	33	0.87	78301										25957		7
9	0.018	15.934	11	30	0.288	25957										28810		8
10	0.018	17.355	11	31	0.32	28810										54606		24
11	0.037	16.369	11	31	0.607	54606
