# Supplementary material for: Monoallelically expressed noncoding RNAs form nucleolar territories on NOR-containing chromosomes and regulate rRNA expression
Source: eLife journal article supplement (doi:10.7554/elife.80684), 2024-01-19
Supplement: supp [file Figure 5-figure supplement 3-Source Data 1.xlsx]

## Sheet: 14HWT
14h 1216 L_S		Area	Mean	Min	Max	IntDen	RawIntDen	ratio	14h 0314 L_S	Area	Mean	Min	Max	IntDen	RawIntDen		14H 12130311	Area	Mean	Min	Max	IntDen	RawIntDen		14hwt	6hwt	6hkd	14hkd
1		0.001	17.455	15	27	0.023	2112		1	0.0005778	26.731	21	42	0.015	1390	4.00576	1	0.0009333	25	15	41	0.023	2100		0.727273	1.28841	0.373827	2.86718
2		0.002	18.98	13	29	0.032	2904	0.727273	2	18	19.278	17	25	347	347		2	55	21.964	15	31	1208	1208	1.73841	1.86674	1.88844	0.263471	2.4795
3		0.001	24.977	17	46	0.036	3222		3	50	17.86	15	23	893	893		3	107	79.486	69	98	8505	8505		4.00576	1.51406	0.44	9.02809
4		0.0008444	22.711	18	34	0.019	1726	1.86674	4	18	17.056	16	19	307	307	2.90879	4	75	77.053	66	103	5779	5779	1.47171	1.86108	0.383713	0.399361	6.96104
5		0.001	45.405	29	84	0.066	5948		5	53	37.66	30	53	1996	1996										2.90879	2.68908	0.145999	7.04615
6		0.0009778	36.318	26	60	0.036	3196	1.86108	6	30	35.233	30	48	1057	1057	1.88836									4.30563	2.00093	0.376607	4.57816
7		0.002	45.094	35	67	0.112	10101		7	47	30.319	23	43	1425	1425										1.88836	3.73031	0.356115	0.855089
8		0.001	22.132	18	29	0.026	2346	4.30563	8	16	24.875	23	29	398	398	3.5804									1.22079	1.71654	0.207019	13.2764
9		0.002	50.468	38	79	0.079	7116		9	83	43.06	33	56	3574	3574										3.5804	13.4928	0.168262	1.26235
10		0.002	41.049	31	59	0.065	5829	1.22079	10	14	38	33	45	532	532	6.71805									1.23042	1.83167	0.834787	3.9931
11		0.002	27.872	21	49	0.051	4571		11	79	50.038	41	66	3953	3953										6.71805	2.51025	0.694301	0.276839
12		0.002	26.162	24	36	0.041	3715	1.23042	12	12	29	27	35	348	348	11.3592						WT			1.24919	0.549252	0.115564	2.0122
13		0.002	75.162	62	85	0.124	11124		13	53	41.226	36	53	2185	2185										11.3592	1.48096	0.608077	8.21875
14		0.001	74.208	58	85	0.099	8905	1.24919	14	52	45.962	36	64	2390	2390	0.914226									1.94694	0.895496	0.646395	2.17604
15		0.002	41.546	23	85	0.08	7229		15	77	44.26	35	58	3408	3408										0.914226	0.0867164	0.973704	2.72914
16		0.001	34.064	26	45	0.041	3713	1.94694	16	42	39.524	35	48	1660	1660	2.05301									4.35613	2.08691	0.740757	2.69444
17		0.001	41.784	31	60	0.058	5223		17	79	50.924	41	64	4023	4023										2.05301	15.7062	22.4661	2.29388
18		0.0003889	34.257	30	40	0.013	1199	4.35613	18	15	46.667	41	56	700	700	5.74714									3.53708	0.63058	0.469478	4.28862
19	MAX_Stack.tif:0022-0021	0.0007778	22.486	17	34	0.017	1574		19	50	40.86	34	53	2043	2043										5.74714	0.992655	1.27157	2.94251
	1	0.0002778	17.8	14	23	0.005	445	3.53708	20	5	34	31	36	170	170	12.0176									0.589586	0.720483	14.4565	1.27142
	1	0.0009667	16.529	13	25	0.016	1438		21	74	12.176	8	23	901	901										12.0176	1.23898	0.1708	2.94056
	2	0.001	21.973	17	34	0.027	2439	0.589586	22	75	35.613	29	49	2671	2671	0.337327									3.95135	2.3057	0.113425	2.37037
	3	0.002	57.01	44	82	0.132	11858		23	109	37.193	29	55	4054	4054										0.337327	0.847356	0.100072	0.90039
	4	0.0006889	48.403	43	60	0.033	3001	3.95135	24	130	39.862	29	69	5182	5182	0.782323									1.80026	1.09091	0.419681	10.6056
	5	0.001	33.927	27	54	0.046	4173		25	111	35.234	21	79	3911	3911										0.782323	2.9614	3.20933	1.33646
	6	0.0008778	29.342	25	37	0.026	2318	1.80026	26	52	27.865	21	44	1449	1449	2.6991									0.550044	11.4777	0.798885	0.667237
	7	0.001	27.383	24	35	0.035	3149		27	120	57.3	39	94	6876	6876										2.6991	0.495233	0.128296	1.11854
	8	0.002	30.615	26	40	0.064	5725	0.550044	28	14	25.429	23	28	356	356	19.3146									19.3146	4.11846
																									1.73841	1.37059
																									1.47171	0.351502

## Sheet: 14hkd
	Area	Mean	Min	Max	IntDen	RawIntDen	ratio		Area	Mean	Min	Max	IntDen	RawIntDen	ratio
1	0.001	47.636	38	70	0.052	4716		1	0.0008889	69.888	52	85	0.062	5591
2	0.0004778	44.233	38	55	0.021	1902	2.4795	2	0.0003667	59.091	50	73	0.022	1950	2.86718
3	0.0006889	34.581	27	49	0.024	2144		3	0.001	41.922	33	56	0.054	4821
4	0.0001556	22	20	25	0.003	308	6.96104	4	0.0001667	35.6	32	40	0.006	534	9.02809
5	0.0009	67.852	53	85	0.061	5496	7.04615	5	0.0006333	32.368	26	46	0.021	1845
6	0.0001556	55.714	50	64	0.009	780		6	0.0003556	12.594	11	14	0.004	403	4.57816
7	0.0007889	60.211	49	83	0.048	4275		7	0.0008333	40.44	35	52	0.034	3033
8	0.0001111	32.2	30	36	0.004	322	13.2764	8	0.0009333	42.226	35	52	0.039	3547	0.855089
9	0.0006333	40.632	32	52	0.026	2316		9	0.0003778	24.059	20	32	0.009	818
10	0.0003	21.481	20	25	0.006	580	3.9931	10	0.0003111	23.143	20	30	0.007	648	1.26235
11	0.0005889	46.698	39	59	0.028	2475		11	0.0008556	16.377	14	23	0.014	1261
12	0.0003333	41	36	48	0.014	1230	2.0122	12	0.002	22.22	16	34	0.051	4555	0.276839
13	0.0007111	45.969	36	59	0.033	2942		13	0.0008222	17.77	15	23	0.015	1315
14	0.0003778	39.765	36	49	0.015	1352	2.17604	14	0.0001222	14.545	14	16	0.002	160	8.21875
15	0.0006556	27.949	23	38	0.018	1649		15	0.0007667	36.507	29	48	0.028	2519
16	0.0002778	24.48	23	28	0.007	612	2.69444	16	0.0003333	30.767	29	34	0.01	923	2.72914
17	0.001	44.421	35	64	0.047	4220		17	0.001	40.573	33	57	0.043	3895
18	0.0003222	33.931	32	37	0.011	984	4.28862	18	0.0006444	29.276	26	37	0.019	1698	2.29388
19	0.0006778	50.836	41	68	0.034	3101		19	0.001	48.911	41	78	0.049	4402
20	0.0007111	38.109	29	51	0.027	2439	1.27142	20	0.0003556	46.75	41	55	0.017	1496	2.94251
21	0.0007111	28	24	39	0.02	1792		21	0.0004889	19.114	18	24	0.009	841
22	0.0004444	18.9	18	23	0.008	756	2.37037	22	0.0001778	17.875	17	21	0.003	286	2.94056
23	0.0006333	36.474	33	47	0.023	2079	0.90039	23	0.001	45.504	36	85	0.059	5324
24	0.0007	36.651	32	47	0.026	2309		24	0.0001444	38.615	35	45	0.006	502	10.6056
25	0.0008111	16.014	14	19	0.013	1169
26	0.001	18.638	14	26	0.019	1752	0.667237
27	0.002	42.063	30	60	0.066	5973	1.11854
28	0.001	44.874	30	74	0.059	5340
29	0.002	54.892	39	85	0.101	9112
30	0.001	60.336	39	85	0.076	6818	1.33646

## Sheet: 6HWT
6HWT0314	Area	Mean	Min	Max	IntDen	RawIntDen	ratio		6HWT1216	Area	Mean	Min	Max	IntDen	RawIntDen	ratio	summary
1	0.0009111	45.829	36	64	0.042	3758			1	0.001	32.745	27	42	0.034	3078	1.28841	1.28841
2	49	40.612	36	52	1990	1990	1.88844		2	68	35.132	30	49	2389	2389		1.88844
3	137	47.555	38	77	6515	6515			3	69	31.754	24	43	2191	2191		1.51406
4	83	51.843	38	69	4303	4303	1.51406		4	164	34.817	24	54	5710	5710	0.383713	0.383713
5	69	46.377	30	86	3200	3200			5	75	57.493	52	67	4312	4312		2.68908
6	34	35	30	44	1190	1190	2.68908		6	37	58.243	55	69	2155	2155	2.00093	2.00093
7	91	44.231	32	63	4025	4025			7	124	21.927	15	32	2719	2719		3.73031
8	29	37.207	32	50	1079	1079	3.73031		8	74	21.405	16	28	1584	1584	1.71654	1.71654
9	84	44.333	38	58	3724	3724			9	155	69.852	58	89	10827	10827		13.4928
10	11	25.091	23	29	276	276	13.4928		10	90	65.678	54	84	5911	5911	1.83167	1.83167
11	84	26.238	22	33	2204	2204			11	83	35.807	28	49	2972	2972		2.51025
12	38	23.105	22	27	878	878	2.51025		12	128	42.273	30	60	5411	5411	0.549252	0.549252
13	160	46.188	41	54	7390	7390			13	123	28.772	21	47	3539	3539		1.48096
14	110	45.364	40	58	4990	4990	1.48096		14	130	30.4	22	47	3952	3952	0.895496	0.895496
15	44	13.205	9	18	581	581			15	219	47.037	36	79	10301	10301		0.0867164
16	528	12.689	9	26	6700	6700	0.0867164		16	111	44.468	36	69	4936	4936	2.08691	2.08691
17	218	35.807	25	71	7806	7806			17	160	45.469	32	84	7275	7275		15.7062
18	19	26.158	25	30	497	497	15.7062		18	231	49.944	35	96	11537	11537	0.63058	0.63058
19	103	36.738	32	47	3784	3784			19	74	71.824	58	93	5315	5315		0.992655
20	99	38.505	32	53	3812	3812	0.992655		20	105	70.257	57	96	7377	7377	0.720483	0.720483
21	60	21.083	20	27	1265	1265			21	145	46.607	35	65	6758	6758		1.23898
22	46	22.196	20	26	1021	1021	1.23898		22	69	42.478	36	55	2931	2931	2.3057	2.3057
23	73	19.315	18	22	1410	1410			23	102	31.176	23	47	3180	3180		0.847356
24	83	20.048	18	24	1664	1664	0.847356		24	92	31.685	24	48	2915	2915	1.09091	1.09091
25	91	43.835	36	54	3989	3989			25	247	44.749	33	59	11053	11053		2.9614
26	35	38.486	36	43	1347	1347	2.9614		26	29	33.207	29	42	963	963	11.4777	11.4777
27	111	23.865	21	31	2649	2649			27	146	71.678	50	100	10465	10465		0.495233
28	100	53.49	41	85	5349	5349	0.495233		28	46	55.239	49	72	2541	2541	4.11846	4.11846
									29	102	26.618	22	35	2715	2715		1.37059
									30	201	38.428	30	60	7724	7724	0.351502	0.351502
									31	162	53.056	35	89	8595	8595
									32	142	44.162	28	65	6271	6271	1.37059

## Sheet: 6HKD
6kd12062	Area	Mean	Min	Max	IntDen	RawIntDen	ratio	6kd1213	Area	Mean	Min	Max	IntDen	RawIntDen	ratio	6hkd12063	Area	Mean	Min	Max	IntDen	RawIntDen	ratio	0.373827
1	0.001	37.141	29	52	0.041	3677		1	0.001	23.456	19	29	0.023	2111		1	0.0005333	20.875	17	28	0.011	1002		0.263471
2	296	47.149	29	91	13956	13956	0.263471	2	167	33.814	21	64	5647	5647	0.373827	2	42	18.762	17	24	788	788	1.27157	0.44
3	76	37.855	32	47	2877	2877		3	51	32.569	26	42	1661	1661		3	34	18.029	16	21	613	613		0.399361
4	136	52.971	35	89	7204	7204	0.399361	4	119	31.723	26	45	3775	3775	0.44	4	137	26.197	20	39	3589	3589	0.1708	0.145999
5	86	21.116	18	30	1816	1816		5	19	24.105	21	28	458	458		5	86	60.791	48	80	5228	5228		0.376607
6	182	26.495	19	47	4822	4822	0.376607	6	116	27.043	22	37	3137	3137	0.145999	6	30	54.3	46	68	1629	1629	3.20933	0.356115
7	53	39.736	32	53	2106	2106		7	82	32.28	25	47	2647	2647		7	42	35.452	33	42	1489	1489		0.207019
8	181	56.204	41	86	10173	10173	0.207019	8	175	42.474	23	96	7433	7433	0.356115	8	244	47.566	35	81	11606	11606	0.128296	0.168262
9	116	28.052	23	37	3254	3254		9	50	52.72	36	89	2636	2636		9	46	36.435	30	42	1676	1676		0.834787
10	141	27.645	22	37	3898	3898	0.834787	10	225	69.627	36	108	15666	15666	0.168262	10	298	56.201	44	83	16748	16748	0.100072	0.694301
11	118	25.661	19	31	3028	3028		11	121	60.008	47	84	7261	7261										0.115564
12	556	47.126	24	136	26202	26202	0.115564	12	157	66.611	47	104	10458	10458	0.694301									0.608077
13	171	54.947	41	80	9396	9396		13	161	41.429	32	54	6670	6670										0.646395
14	240	60.567	41	95	14536	14536	0.646395	14	215	51.019	33	97	10969	10969	0.608077									0.973704
15	59	57.051	46	81	3366	3366		15	118	43.305	34	57	5110	5110										0.740757
16	82	55.415	46	79	4544	4544	0.740757	16	129	40.682	33	56	5248	5248	0.973704									22.4661
17	69	30.652	22	46	2115	2115		17	53	50.019	39	68	2651	2651										0.469478
18	145	31.069	25	45	4505	4505	0.469478	18	3	39.333	39	40	118	118	22.4661									1.27157
19	60	22.167	20	28	1330	1330		19	73	27.479	24	39	2006	2006										14.4565
20	5	18.4	18	19	92	92	14.4565	20	86	29.198	25	38	2511	2511	0.798885									0.1708
21	62	29.258	24	37	1814	1814																		0.113425
22	463	34.542	23	62	15993	15993	0.113425																	0.100072
23	115	66.383	56	85	7634	7634																		0.419681
24	258	70.504	55	93	18190	18190	0.419681																	3.20933
																								0.798885
																								0.128296
