# Supplementary material for: Monoallelically expressed noncoding RNAs form nucleolar territories on NOR-containing chromosomes and regulate rRNA expression
Source: eLife journal article supplement (doi:10.7554/elife.80684), 2024-01-19
Supplement: supp [file Figure 5-figure supplement 6-Source Data 1.xlsx]

## Sheet: HTD114WT
H3Ac	Area	Mean	Min	Max	IntDen	RawIntDen	ratio	H3K4me3	Area	Mean	Min	Max	IntDen	RawIntDen	ratio	H4Ac	Area	Mean	Min	Max	IntDen	RawIntDen	ratio
1	0.001	9.062	6	13	0.013	1169	0.620345	1	0.001	9.779	6	13	0.012	1105	0.954235	1	0.001	26.539	24	51	0.034	3052	1.39503
2	0.0005667	14.608	12	19	0.008	745		2	0.002	10.248	8	13	0.018	1650		2	0.0004556	19.024	17	22	0.009	780
3	0.001	30.021	21	42	0.032	2912	5.35325	3	0.0003889	34.914	28	44	0.014	1222	1.07709	3	0.0004444	30.4	28	33	0.014	1216	0.949703
4	0.0005667	5.608	4	7	0.003	286		4	0.0007222	32.415	28	36	0.023	2107		4	0.001	32.01	29	37	0.034	3073
5	0.001	28.435	24	33	0.029	2616	0.787281	5	0.001	15.843	12	20	0.022	2012	0.390404	5	0.001	32.008	25	41	0.045	4033	1.15619
6	0.0003778	36.118	32	41	0.014	1228		6	0.0008222	40.581	33	51	0.033	3003		6	0.0006333	27.684	26	31	0.018	1578
7	0.0003889	29.029	26	33	0.011	1016	0.995883	7	0.001	18.511	14	24	0.019	1703	0.965775	7	0.001	13.652	11	17	0.017	1570	1.53549
8	0.0009667	29.149	27	35	0.028	2536		8	0.0008	19.167	17	21	0.015	1380		8	0.001	8.891	6	12	0.013	1147
9	0.0006667	34.183	31	40	0.023	2051	1.2196	9	0.0005889	22.66	21	24	0.013	1201	2.06733	9	0.0005556	19.34	18	21	0.011	967	0.889727
10	0.0004	28.028	24	31	0.011	1009		10	0.0005667	10.961	10	12	0.006	559		10	0.001	21.737	18	26	0.028	2478
11	0.001	27	24	31	0.029	2565	0.868083	11	0.0005667	15.804	13	18	0.009	806	0.688238	11	0.0006444	7.414	6	9	0.005	430	0.890678
12	0.0003222	31.103	29	36	0.01	902		12	0.0003	22.963	20	27	0.007	620		12	0.0007556	8.324	7	10	0.006	566
13	0.0007778	34.957	30	43	0.027	2447	1.56934	13	0.0004	24.611	21	29	0.01	886	0.773129	13	0.0005778	4.846	4	6	0.003	252	0.555288
14	0.0004444	22.275	19	26	0.01	891		14	0.0002667	31.833	27	37	0.008	764		14	0.0007333	8.727	8	10	0.006	576
15	0.002	11.511	8	15	0.018	1623	0.964232	15	0.001	9.884	6	13	0.013	1196	2.02292	15	0.001	29.812	23	38	0.042	3816	1.06471
16	0.0003556	11.938	11	13	0.004	382		16	0.0008778	4.886	4	7	0.004	386		16	0.0006	28	23	32	0.017	1512
17	0.0004333	32.051	29	37	0.014	1250	1.00454	17	0.0006333	15.316	12	18	0.01	873	1.01916	17	0.001	28.304	19	51	0.036	3255	0.961642
18	0.0003556	31.906	26	40	0.011	1021		18	0.0008	15.028	13	17	0.012	1082		18	0.0009778	30.057	23	48	0.029	2645
19	0.002	9.584	8	14	0.015	1313	0.803016	19	0.0004	9.139	8	11	0.004	329	1.23751	19	0.002	29.433	19	40	0.059	5298	1.39652
20	0.001	11.935	9	18	0.012	1098		20	0.0007222	7.385	6	10	0.005	480		20	0.001	21.076	17	27	0.028	2487
21	0.001	23.646	21	27	0.025	2270	1.30353	21	0.0009	17.284	14	23	0.016	1400	0.89217	21	0.0005111	5.978	5	6	0.003	275	1.13975
22	0.0004778	18.14	17	20	0.009	780		22	0.001	19.373	12	26	0.024	2131		22	0.0005444	5.245	5	6	0.003	257
23	0.0009333	36.429	33	42	0.034	3060	3.41319	23	0.001	4.031	2	5	0.006	512	1.85504	23	0.0005778	12.288	9	16	0.007	639	0.990648
24	0.0006111	10.673	9	13	0.007	587		24	0.0008333	2.173	1	3	0.002	163		24	0.0005778	12.404	7	18	0.007	645
25	0.0009	19.716	17	26	0.018	1597	1.15596	25	0.001	6.223	3	13	0.008	697	0.712666	25	0.002	14.286	12	18	0.036	3200	0.736734
26	0.0009889	17.056	15	20	0.017	1518		26	0.0007889	8.732	5	13	0.007	620		26	0.0007667	19.391	16	23	0.015	1338
27	0.0008111	26.808	23	30	0.022	1957	1.06728	27	0.0002556	17.826	12	22	0.005	410	1.1771	27	0.002	13.581	11	17	0.021	1847	1.5275
28	0.0005667	25.118	20	34	0.014	1281		28	0.001	15.144	12	20	0.016	1469		28	0.001	8.891	6	12	0.013	1147

## Sheet: HTD114KD
H3Ac	Area	Mean	Min	Max	IntDen	RawIntDen	ratio	H3K4me3	Area	Mean	Min	Max	IntDen	RawIntDen	ratio	H4Ac	Area	Mean	Min	Max	IntDen	RawIntDen	ratio
1	0.0006889	10.839	10	12	0.007	672		1	0.0002222	9.65	9	10	0.002	193	0.420589	1	0.0003556	45.094	39	58	0.016	1443	2.62709
2	0.0005111	11.022	10	13	0.006	507	0.983397	2	0.0007889	22.944	22	25	0.018	1629		2	0.0008778	17.165	14	21	0.015	1356
3	0.0006	13.37	11	16	0.008	722		3	0.0008	31.569	26	45	0.025	2273	3.98649	3	0.0007667	18.464	16	21	0.014	1274	1.09306
4	0.001	15.699	8	23	0.021	1931	0.851647	4	0.0004111	7.919	7	9	0.003	293		4	0.0004111	16.892	15	19	0.007	625
5	0.0004556	8.561	8	10	0.004	351		5	0.0005444	26.327	23	28	0.014	1290	1.46465	5	0.0009111	8.402	7	10	0.008	689	0.624081
6	0.0003444	6.581	6	8	0.002	204	1.30087	6	0.0008889	17.975	15	20	0.016	1438		6	0.001	13.463	11	18	0.016	1454
7	0.0008778	9.899	7	14	0.009	782		7	0.0009222	14.217	10	18	0.013	1180	0.88151	7	0.001	13.767	12	16	0.016	1418	0.614543
8	0.0002778	17.32	15	22	0.005	433	0.571536	8	0.0004333	16.128	13	20	0.007	629		8	0.0009667	22.402	19	27	0.022	1949
9	0.0006	29.889	25	39	0.018	1614		9	0.0006778	20.541	14	27	0.014	1253	1.01457	9	0.001	13.764	12	16	0.016	1459	0.618079
10	0.0009889	44.91	36	58	0.044	3997	0.665531	10	0.0007222	20.246	19	23	0.015	1316		10	0.0007444	22.269	19	26	0.017	1492
11	0.0007333	26.045	20	32	0.019	1719		11	0.002	8.903	6	12	0.018	1656	1.01807	11	0.0007333	18.591	16	21	0.014	1227	1.21185
12	0.0007444	33.119	24	39	0.025	2219	0.786407	12	0.0005667	8.745	7	14	0.005	446		12	0.0004556	15.341	14	17	0.007	629
13	0.0005667	20.961	18	24	0.012	1069		13	0.0007	18.127	14	25	0.013	1142	1.27547	13	0.001	28.229	22	40	0.034	3077	1.44195
14	0.0008889	32.638	28	42	0.029	2611	0.642227	14	0.0005778	14.212	11	22	0.008	739		14	0.0008667	19.577	17	22	0.017	1527
15	0.0007889	9.746	9	11	0.008	692		15	0.001	15.626	12	19	0.019	1672	0.38076	15	0.0009444	13.941	11	17	0.013	1185	1.35297
16	0.001	13.688	11	16	0.014	1273	0.712011	16	0.001	41.039	31	52	0.047	4186		16	0.001	10.304	8	13	0.011	948
17	0.0006667	41.467	34	49	0.028	2488		17	0.0007111	24.031	18	30	0.017	1538	0.510831	17	0.0008111	36.479	28	46	0.03	2663	2.06096
18	0.0007444	39.06	33	44	0.029	2617	1.06162	18	0.0007667	47.043	36	59	0.036	3246		18	0.001	17.7	14	22	0.018	1593
19	0.0007	44.746	38	55	0.031	2819		19	0.0004778	14.326	10	19	0.007	616	0.778037	19	0.0004222	30.632	28	33	0.013	1164	1.02192
20	0.0004444	39.75	35	44	0.018	1590	1.12569	20	0.0007	18.413	12	25	0.013	1160		20	0.001	29.975	26	34	0.04	3627
21	0.001	23.592	20	38	0.026	2312		21	0.0008444	16.079	12	23	0.014	1222	1.30332	21	0.001	1.978	1	2	0.002	184	0.71305
22	0.001	24.689	19	34	0.028	2543	0.955567	22	0.001	12.337	8	16	0.014	1246		22	0.0009333	2.774	2	3	0.003	233
23	0.0005889	31.981	27	37	0.019	1695		23	0.0005333	13.75	10	18	0.007	660	0.855046	23	0.002	4.691	2	10	0.007	638	0.413924
24	0.0004889	31.341	24	40	0.015	1379	1.02042	24	0.0004111	16.081	13	20	0.007	595		24	0.0005333	11.333	8	16	0.006	544
																25	0.0007778	17.943	15	21	0.014	1256	1.08149
																26	0.0004889	16.591	15	19	0.008	730
																27	0.002	21.833	16	29	0.039	3537	1.81942
																28	0.001	12	9	15	0.014	1260
