# Supplementary material for: Monoallelically expressed noncoding RNAs form nucleolar territories on NOR-containing chromosomes and regulate rRNA expression
Source: eLife journal article supplement (doi:10.7554/elife.80684), 2024-01-19
Supplement: supp [file Figure 5-figure supplement 7-Source Data 1.xlsx]

## Sheet: RPE1WT
H3Ac	LS							H3K4me3	Area	Mean	Min	Max	IntDen	RawIntDen	ratio	H4Acwt	Area	Mean	Min	Max	IntDen	RawIntDen	ratio	H3AcWT	H3AcKD	H3K4me3wt	H3K4me3kd	H4Acwt	H4Ackd
1	0.0005333	12.125	10	14	0.006	582	0.607282	1	0.0009778	23.227	15	36	0.023	2044	0.84034	1	0.0005778	14.846	14	16	0.009	772	0.69322	0.607282	1.14174	0.84034	0.416144	0.69322	0.899189
2	0.0006444	19.966	16	30	0.013	1158		2	0.0009556	27.64	16	35	0.026	2377		2	0.0008556	21.416	19	28	0.018	1649		1.98995	1.42774	0.949945	1.10098	2.31523	0.793362
3	0.0004444	21.15	19	24	0.009	846		3	0.0006222	48.125	37	61	0.03	2695	1.73937	3	0.0006889	15.677	11	21	0.011	972	0.895829	1.34352	0.343757	1.73937	1.17043	0.895829	1.01114
4	0.0007444	22.687	20	29	0.017	1520	0.932252	4	0.002	27.668	17	45	0.057	5091		4	0.0002	17.5	15	20	0.004	315		0.932252	1.42498	0.574717	0.850382	1.06105	0.745435
5	0.001	23.457	19	31	0.027	2463		5	0.001	17.923	13	23	0.021	1864	1.04222	5	0.0002889	22.885	18	30	0.007	595	1.04398	0.372875	0.70467	1.04222	1.45422	1.04398	1.07409
6	0.0004222	25.316	23	28	0.011	962	0.926568	6	0.0006778	17.197	14	21	0.012	1049		6	0.0004222	21.921	19	27	0.009	833		0.926568	1.00489	0.672662	0.724467	0.990378	1.20639
7	0.0007222	12.031	10	14	0.009	782		7	0.0006333	17.404	12	21	0.011	992	0.368534	7	0.0004222	8.658	8	11	0.004	329	0.816792	1.57311	1.01499	0.368534	1.12371	0.816792	1.43346
8	0.0004222	13.632	13	15	0.006	518	0.882556	8	0.001	47.225	38	59	0.054	4817		8	0.0007778	10.6	10	12	0.008	742		0.882556	1.67577	1.27012	0.601654	0.780565	0.802734
9	0.0004222	14.342	12	18	0.006	545		9	0.0003444	5.387	4	7	0.002	167	0.596898	1	0.0008444	9.697	9	11	0.008	737	0.770337	0.257121	1.0429	0.596898	1.31874	0.770337	1.55052
10	0.0008889	12.1	10	15	0.011	968	1.2	10	0.0004444	9.025	7	13	0.004	361		2	0.0003778	12.588	11	18	0.005	428		1.2	0.751343	2.3163	1.34994	1.19968	1.2657
11	0.0004111	10.541	9	12	0.004	390		11	0.0004556	4.878	4	6	0.002	200	0.231371	3	0.0005222	18.574	16	21	0.01	873	2.56441	1.35543	1.05599	0.231371	0.69552	2.56441	1.01232
12	0.0007111	7.562	6	9	0.005	484	1.33333	12	0.0004	21.083	12	27	0.008	759		4	0.002	7.243	4	10	0.017	1492		1.33333	1.18571	1.04791	0.64364	1.27282	3.15379
13	0.0009667	8.793	8	10	0.009	765		13	0.0005111	13.152	10	16	0.007	605	1.29169	5	0.0007556	12.897	11	16	0.01	877	0.561496	1.26947	1.3589	1.29169	1.42236	0.561496	0.822207
14	0.0009556	9.302	8	13	0.009	800	0.945281	14	0.0008556	10.182	7	14	0.009	784		6	0.0007111	22.969	22	29	0.016	1470		0.945281	1.05808	0.783094	0.61225	1.80342	0.727537
15	0.0006	13.907	11	17	0.008	751		15	0.0008444	23.421	18	32	0.02	1780	1.16511	7	0.0005667	15.275	14	17	0.009	779	1.80342		0.651199	1.16511	0.60436
16	0.0002444	10.955	10	12	0.003	241	1.26947	16	0.001	20.102	15	30	0.026	2372		8	0.002	8.47	7	12	0.014	1279			1.50477	1.23737	0.507678
17	0.0007556	18.221	13	25	0.014	1239		17	0.0002889	18.308	17	20	0.005	476	0.884573	9	0.001	17.141	15	24	0.019	1697	1.27282		0.982829	0.884573
18	0.0009778	13.443	11	18	0.013	1183	1.35543	18	0.0003667	20.697	18	23	0.008	683		10	0.0006667	13.467	12	15	0.009	808
19	0.0006889	7.194	6	8	0.005	446		19	0.0004667	12.881	11	16	0.006	541	1.23737	11	0.0007667	13.362	8	27	0.01	922	1.19968
20	0.0005333	27.979	25	33	0.015	1343	0.257121	20	0.0009222	10.41	6	15	0.01	864		12	0.0003222	11.138	10	14	0.004	323
21	0.001	39.471	33	46	0.046	4105		21	0.0005111	14.304	13	17	0.007	658	0.783094	13	0.0009333	15.31	14	18	0.014	1286	0.780565
22	0.0008556	25.091	21	32	0.021	1932	1.57311	22	0.001	18.266	15	21	0.019	1717		14	0.0006333	19.614	18	21	0.012	1118
23	0.0003222	5.966	5	7	0.002	173		23	0.0006556	17.475	12	29	0.011	1031	1.04791	15	0.0006	4.426	4	5	0.003	239	0.990378
24	0.0003111	16	13	19	0.005	448	0.372875	24	0.0008222	16.676	14	22	0.014	1234		16	0.001	4.469	3	6	0.005	429
25	0.0005556	8.44	8	9	0.005	422		25	0.0009111	29.915	22	41	0.027	2453	2.3163	17	0.002	33.909	14	53	0.058	5222	1.06105
26	0.0004333	6.282	5	7	0.003	245	1.34352	26	0.001	12.915	10	16	0.013	1214		18	0.002	31.958	25	48	0.059	5337
27	0.0002111	40	36	46	0.008	760		27	0.0006889	17.581	16	23	0.012	1090	1.27012	19	0.0008	14.792	12	22	0.012	1065	2.31523
28	0.0008778	20.101	17	26	0.018	1588	1.98995	28	0.0004222	13.842	12	18	0.006	526		20	0.002	6.389	5	8	0.014	1297
								29	0.0005667	8.863	7	10	0.005	452	0.672662
								30	0.0003778	13.176	12	15	0.005	448
								31	0.0005111	15.13	13	18	0.008	696	0.574717
								32	0.0005111	26.326	25	27	0.013	1211
								33	0.0006111	19.927	15	24	0.012	1096	0.949945
								34	0.0009667	20.977	12	34	0.02	1825

## Sheet: RPE1KD
H3Ac	Area	Mean	Min	Max	IntDen	RawIntDen	ratio	H3K4me3	Area	Mean	Min	Max	IntDen	RawIntDen	ratio	H4Ac	Area	Mean	Min	Max	IntDen	RawIntDen	ratio
1	0.0007889	9.014	8	10	0.007	640	1.14174	1	0.0004778	8.233	7	10	0.004	354	0.416144	1	0.0007333	13.076	12	14	0.01	863	0.899189
2	0.0004222	7.895	5	11	0.003	300		2	0.0004111	19.784	13	26	0.008	732		2	0.0006556	14.542	13	18	0.01	858
3	0.001	10.278	9	12	0.013	1182	0.343757	3	0.0003222	17.828	17	19	0.006	517	1.17043	3	0.0006444	9.983	9	13	0.006	579	1.01114
4	0.001	29.899	24	39	0.036	3259		4	0.0006222	15.232	14	16	0.009	853		4	0.0007889	9.873	8	13	0.008	701
5	0.0006444	7.862	7	9	0.005	456	0.70467	5	0.0009333	17.202	15	21	0.016	1445	1.45422	5	0.0006889	9.452	8	11	0.007	586	1.07409
6	0.0009222	11.157	10	13	0.01	926		6	0.0003889	11.829	11	14	0.005	414		6	0.0003333	8.8	7	12	0.003	264
7	0.0004111	5.892	5	6	0.002	218	1.01499	7	0.0009556	15.605	12	19	0.015	1342	1.12371	7	0.0007111	28.609	21	39	0.02	1831	1.43346
8	0.0004556	5.805	5	7	0.003	238		8	0.0008889	13.887	13	16	0.012	1111		8	0.0005333	19.958	15	29	0.011	958
9	0.0006778	9.869	8	14	0.007	602	1.0429	9	0.0009556	20.488	13	37	0.02	1762	1.31874	9	0.0006444	17.172	15	20	0.011	996	1.55052
10	0.0004556	9.463	7	14	0.004	388		10	0.0006222	15.536	12	20	0.01	870		10	0.0004444	11.075	10	12	0.005	443
11	0.0007333	9.939	8	14	0.007	656	1.05599	11	0.001	10.944	8	16	0.011	985	0.69552	11	0.0006333	6.491	5	8	0.004	370	1.01232
12	0.0003778	9.412	8	14	0.004	320		12	0.0003778	15.735	9	19	0.006	535		12	0.0003778	6.412	4	9	0.002	218
1	0.0006889	10.613	6	15	0.007	658	1.3589	13	0.0004556	18	17	20	0.008	738	1.42236	13	0.0005444	7.02	7	8	0.004	344	0.822207
2	0.0008778	7.81	6	10	0.007	617		14	0.0006444	12.655	11	14	0.008	734		14	0.0005778	8.538	7	10	0.005	444
3	0.0007333	13.121	10	16	0.01	866	0.651199	15	0.001	11.31	8	13	0.015	1312	0.60436	15	0.0006	6	3	8	0.004	324	0.727537
4	0.0008222	20.149	18	23	0.017	1491		16	0.0003111	18.714	17	23	0.006	524		16	0.0009444	8.247	7	13	0.008	701
5	0.0003778	28.735	27	30	0.011	977	1.50477	17	0.001	7.347	5	10	0.008	698	0.61225	17	0.0008444	29.961	25	41	0.025	2277	3.15379
6	0.0005778	19.096	17	21	0.011	993		18	0.001	12	9	14	0.013	1212		18	0.0006889	9.5	8	12	0.007	589
7	0.0008	22.736	21	25	0.018	1637	1.05808	19	0.0008333	11.693	8	15	0.01	877	0.64364	19	0.0004778	31.326	23	41	0.015	1347	1.2657
8	0.0004556	21.488	17	32	0.01	881		20	0.0006667	18.167	16	20	0.012	1090		20	0.0007556	24.75	20	29	0.019	1683
9	0.0004444	23.675	21	27	0.011	947	1.18571	21	0.0005889	15.415	7	33	0.009	817	1.34994	21	0.0006333	7.105	6	8	0.005	405	0.802734
10	0.001	19.967	15	29	0.02	1837		22	0.0006889	11.419	8	15	0.008	708		22	0.0005222	8.851	7	15	0.005	416
11	0.0005222	9.234	7	11	0.005	434	0.751343	23	0.0004667	15.643	14	18	0.007	657	0.601654	23	0.0008444	14.724	13	19	0.012	1119	1.20639
12	0.0007667	12.29	10	16	0.009	848		24	0.0001556	26	23	30	0.004	364		24	0.0008667	12.205	11	14	0.011	952
13	0.0007	26.762	24	30	0.019	1686	1.67577	25	0.0005	10.867	9	12	0.005	489	0.724467	25	0.001	11.511	10	13	0.012	1059	0.745435
14	0.001	15.97	14	18	0.018	1597		26	0.0005	15	11	17	0.008	675		26	0.001	15.442	12	24	0.018	1606
15	0.0007556	23.353	18	32	0.018	1588	0.982829	27	0.0008778	12.861	9	18	0.011	1016	0.507678	27	0.001	9.322	8	11	0.012	1100	0.793362
16	0.0005111	23.761	21	30	0.012	1093		28	0.0002	25.333	20	30	0.005	456		28	0.0007556	11.75	9	15	0.009	799
17	0.0001667	21	19	25	0.004	315	1.42498	29	0.0008222	8.014	7	9	0.007	593	0.850382
18	0.0004222	14.737	11	18	0.006	560		30	0.0006556	9.424	7	11	0.006	556
19	0.0003444	16.419	12	20	0.006	509	1.42774	31	0.0008556	5.844	5	8	0.005	450	1.10098
20	0.0003778	11.5	8	14	0.004	391		32	0.0002889	5.308	4	6	0.002	138
21	0.0002889	26.308	22	32	0.008	684	1.00489
22	0.0005556	26.18	22	43	0.015	1309
