# Supplementary material for: Monoallelically expressed noncoding RNAs form nucleolar territories on NOR-containing chromosomes and regulate rRNA expression
Source: eLife journal article supplement (doi:10.7554/elife.80684), 2024-01-19
Supplement: supp [file Figure 5-figure supplement2D_Northern bolt with labels.docx]

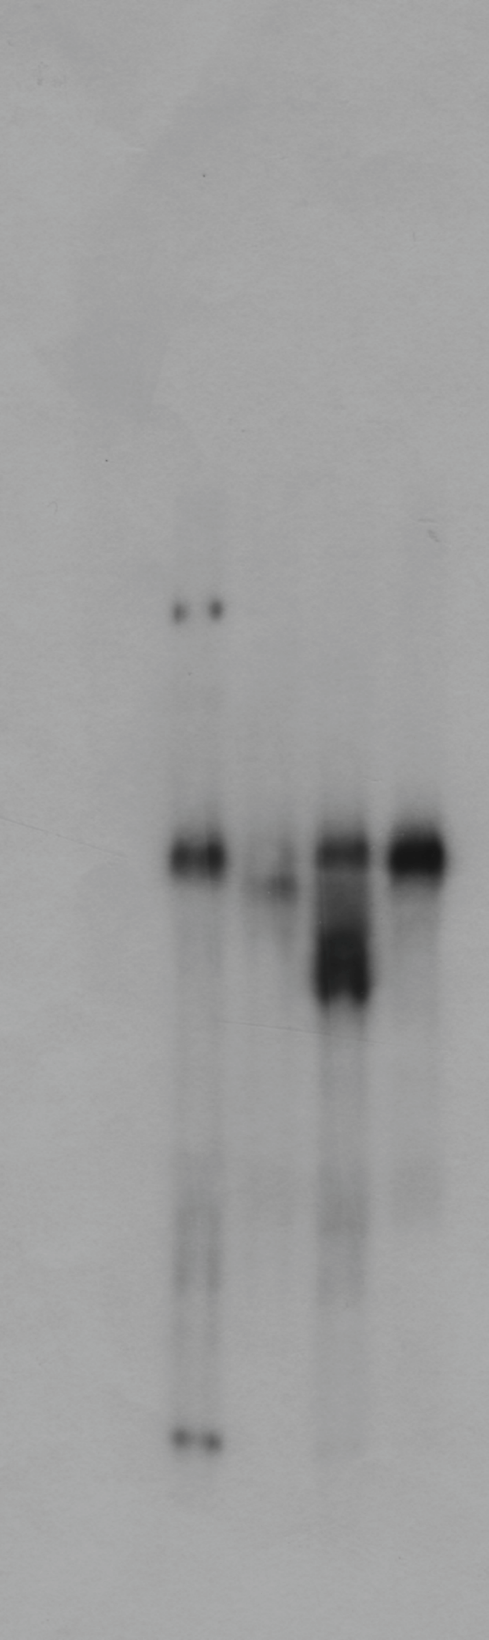


Northern blot using 5-ETS-1 probe and total RNA isolated from control SNUL-depleted, 18S knock down and ITS-1 knock down WI-38 cells

ASO-ITS1

ASO-18S

ASO-SNUL

Ctr-ASO

+1-01

30S+1

47S
