# Supplementary material for: Monoallelically expressed noncoding RNAs form nucleolar territories on NOR-containing chromosomes and regulate rRNA expression
Source: eLife journal article supplement (doi:10.7554/elife.80684), 2024-01-19
Supplement: supp [file Figure 5-Source Data 1.xlsx]

## Sheet: Fig.5c
ASO-SCR	Area	Mean	Min	Max	Int Den	Raw IntDen					ASO-SNUL	Area	Mean	Min	Max	Int Den	Raw IntDen				Summary
1	0.8	1596.1	1288	2416	1276.48	245800	37671.9		37671.9		1	45.227	2171.6	1267	4913	98215.2	18912458	98215.2	98215.2					scr	ASOsnul	Median		Rank		R1	R2	N1	N2	U1	U2	U	z	p
	0.691	1724.38	1288	2872	1191.01	229342			59412.4		2	38.035	1848.57	1267	3595	70309.5	13538895	98427.8	98427.8					9629.8	18027.6	52666.1	78494.4	1	6	8744	21637	87	159	8917	1408886	8917	3.74906	0.000177498
	18.794	1873.18	1286	4944	35204.5	6779024			29898.6			14.24	1974.66	1267	3682	28118.4	5414515		19827.1					11683.6	18861.6			2	8
2	6.232	2027.89	1286	3412	12637.4	2433467	59412.4		74624.1		3	11.949	1659.25	1267	3190	19827.1	3817933	19827.1	31880.5					12763.8	19539.1			3	10
	12.801	1853.47	1287	3780	23726.5	4568800			26431.4		4	10.973	1913.35	1267	3370	20995.5	4042915	31880.5	132777					13333.3	19788.7			4	11
	1.148	1913.77	1286	2876	2196.41	422944			9629.8			6.143	1771.8	1268	3056	10885.1	2096044		330742					16796.1	19827.1			5	12
	10.449	1995.69	1286	4042	20852.2	4015332			33712.3										84507.9					18449.5	20856.7			7	14
3	2.726	1913.69	1286	3335	5217.5	1004690	29898.6		29753		5	58.433	2272.28	1225	6317	132777	25567693	132777	112805					18904.6	20968.3			9	15
	7.707	1982.07	1287	3921	15275.1	2941394			11683.6		6	148.14	2232.63	1225	7274	330742	63688081	330742	43989.2					20044.4	24306.3			13	18
	4.44	1904.01	1287	3240	8454.07	1627929			70975.5		7	46.11	1832.75	1225	4432	84507.9	16272963	84507.9	96135.3					22957.4	24637.9			16	19
	0.556	1713.21	1286	2599	951.977	183314			37212.7		8	60.485	1865.03	1225	5543	112805	21721981	112805	94539.5					23331.7	24877.9			17	20
4	12.775	1892.22	1287	4550	24173.3	4654852	74624.1		29973.8		9	2.981	1829.93	1228	3602	5454.77	1050379	43989.2	155535					25315.2	24992.5			23	21
	5.188	1959.01	1286	3479	10163.3	1957051			36014.4			19.755	1950.64	1225	4261	38534.5	7420251		155535					26431.4	25155.8			24	22
	20.518	1796.66	1286	3459	36864	7098593			42175.2		10	3.35	1690.94	1225	3120	5663.93	1090654	96135.3	73731.3					27214.3	27980.6			25	26
	1.916	1786.55	1286	3334	3423.52	659238			101056			1.75	1571.93	1227	5240	2751.02	529740		31530.5					29753	28213.8			29	27
5	16.327	1618.85	1286	2676	26431.4	5089668	26431.4		66964.1			48.717	1800.62	1225	7335	87720.4	16891569		122649					29898.6	29507.1			30	28
6	2.275	1636.84	1287	2391	3723.14	716934	9629.8		33018.4		11	54.429	1736.92	1225	10428	94539.5	18204671	94539.5	52779.2					29973.8	31530.5			31	33
	3.479	1697.6	1288	2551	5906.66	1137395			67244.6		12	64.9845	1196.71	612.5	3928	155535	29950073	155535	93786.8					31105.3	31880.5			32	35
									36295.5		13	64.9845	1196.71	612.5	3928	155535	29950073	155535	28213.8					31763.3	32148.6			34	36
7	1.818	1760.48	1259	2784	3199.85	616167	33712.3		16796.1		14	38.492	1782.35	1225	4389	68605.3	13210745	73731.3	43830					32792.6	32489			38	37
	15.372	1863.51	1259	3715	28645.4	5515992			117765			3.085	1661.72	1225	2869	5125.95	987061		134042					33018.4	32803.7			42	39
	0.774	2412.99	1272	6550	1867.12	359536			18904.6		15	3.994	1826.87	1225	3363	7295.68	1404866	31530.5	42640.7					33200.9	32821.9			44	40
8	10.293	1574.57	1259	2717	16206.8	3120805	29753		32792.6			10.568	1921.56	1225	8468	20307.1	3910367		47911.6					33387.4	32954.2			45	41
	8.122	1667.83	1259	3204	13546.2	2608484			99132.2			2.337	1680.71	1225	3054	3927.68	756320		62530.5					33712.3	33093.6			47	43
9	0.556	1466.32	1259	1958	814.784	156896	11683.6		56881.2		16	76.36	1606.2	1225	4087	122649	23617562	122649	37078.5					36014.4	33508.6			51	46
	3.147	1574.7	1259	4788	4955.66	954269			52313.1										83967					36295.5	34166.4			52	48
	3.365	1757.17	1260	5363	5913.15	1138645			51583.1		17	23.951	2155.27	1373	4628	51620.4	9940107	52779.2	32954.2					37212.7	34918.8			54	49
10	6.881	1790.44	1259	4085	12319.9	2372336	70975.5		99414.7			0.618	1875.12	1376	2858	1158.79	223139		32803.7					37667.4	35012.8			55	50
	2.124	1777.25	1263	3194	3774.88	726896			71134.9		18	40.86	2295.34	1373	5230	93786.8	18059720	93786.8	60050.3					37671.9	37078.5			56	53
	11.96	1834.66	1259	4208	21942.2	4225220			107694		19	4.783	2082.48	1373	4508	9960.28	1917967	28213.8	46185.4					38964.4	39277.3			57	59
	1.89	1683.53	1259	3106	3182.39	612806			33387.4			0.976	1832.47	1375	3048	1789.06	344504		45242.9					39136.6	42001.4			58	61
	12.432	2030.1	1259	5074	25239	4860061			38964.4			2.119	1820.78	1378	3011	3857.88	742878		18027.6					40397.3	42187.8			60	63
	2.093	1716.66	1260	3561	3592.7	691816			18449.5			5.993	2103.58	1373	3781	12606.6	2427536		35012.8					42175.2	42640.7			62	65
	0.525	1762.55	1262	2786	924.474	178018			25315.2		20	22.673	1933.11	1373	3599	43830	8439971	43830	32148.6					42191.4	42865.6			64	66
11	18.586	1845.84	1259	10999	34307.2	6606247	37212.7		12763.8		21	46.473	2488.73	1373	4515	115660	22271681	134042	71315.4					43328.4	42928.3			68	67
	1.854	1567.18	1261	2195	2905.48	559483			64430.3			7.894	2328.74	1373	5247	18382.1	3539693		43408.8					47423.7	43408.8			75	69
12	1.319	1596.04	1259	2405	2105.26	405393	29973.8		72328.2		22	3.282	1987.12	1373	3729	6521.87	1255861	42640.7	34166.4					47953.7	43830			78	70
	1.454	1769.42	1259	2885	2572.88	495438			52666.1			4.939	2273.13	1373	4179	11226.3	2161745		49276.4					48562.3	43989.2			81	71
	8.917	1641.7	1259	3700	14638.4	2818799			52625.7			2.778	2007.21	1374	3750	5576.71	1073859		53595.8					49120	45242.9			82	72
	1.184	1576.75	1262	2540	1866.94	359500			49396.5			6.253	2099.49	1373	4200	13127.2	2527786		20968.3					49396.5	45499			85	73
	5.432	1618.23	1259	2615	8790.26	1692665			20044.4			2.098	2127.86	1373	3884	4464.31	859655		42928.3					51583.1	46185.4			88	74
13	20.529	1754.36	1259	3618	36014.4	6934983	36014.4		164857			0.888	1941.76	1374	3383	1724.34	332041		68035.5					51753.1	47822.2			89	76
									52758.8		23	23.691	2022.34	1373	3501	47911.6	9225921	47911.6	32489					52313.1	47911.6			90	77
14	22.751	1604.74	1064	5160	36509.7	7030356	42175.2		42191.4										39277.3					52625.7	48161			91	79
	3.604	1571.99	1064	2899	5665.53	1090962			51753.1		24	7.348	1354.55	1020	2263	9953.65	1916690	62530.5	80646.3					52666.1	48221.3			92	80
15	17.984	1554.57	1064	4370	27957.2	5383474	101056		23331.7			2.29	1341.37	1020	1970	3071.99	591546		42187.8					52758.8	49219.4			93	83
	37.089	1771.08	1064	4047	65688.3	12649029			47953.7			1.293	1264.47	1022	1890	1635.07	314852		72637.6					55027.8	49276.4			97	84
	4.965	1492.74	1064	3322	7410.95	1427063			47423.7			29.295	1634.09	1020	2790	47869.8	9217883		243758					56881.2	50935.2			99	86
16	0.675	1307.88	1066	1888	882.965	170025	66964.1		49120		25	24.766	1497.15	1020	6185	37078.5	7139900	37078.5	34918.8					58953.1	51330.3			103	87
	0.696	1226.02	1065	1647	853.167	164287			40397.3		26	20.804	1343.41	1020	2381	27948	5381700	83967	24637.9					59218.2	52779.2			104	94
	9.457	1294.89	1064	2340	12245.4	2357997			27214.3			41.576	1347.38	1020	2558	56019	10787107		51330.3					59412.4	53595.8			105	95
	1.252	1254.65	1064	1863	1570.25	302370			125362		27	20.882	1578.14	1020	9095	32954.2	6345711	32954.2	27980.6					61210.7	54027			107	96
	1.324	1284.17	1064	1738	1700.56	327463			141374		28	17.179	1602.48	1020	3371	27529	5301017	32803.7	19788.7					64153.7	55726.9			115	98
	0.623	1305.38	1065	1667	813.48	156645			13333.3			3.422	1541.3	1020	2681	5274.76	1015715		24992.5					64430.3	57760.3			117	100
	0.711	1255.39	1064	1743	893.164	171989			247173		29	36.44	1647.91	1020	3098	60050.3	11563378	60050.3	20856.7					65644.6	58310.9			119	101
	1.921	1250.46	1064	2035	2402.72	462671			124051		30	25.685	1624.29	1020	8074	41720.4	8033744	46185.4	215020					66205.4	58719.5			120	102
	1.101	1295.36	1065	1788	1426.12	274616			58953.1			3.095	1442.59	1020	2864	4464.98	859783		129418					66964.1	60050.3			121	106
	0.582	1246.12	1071	1526	724.782	139565			61210.7		31	26.225	1725.16	1020	8274	45242.9	8712049	45242.9	63353.8					67244.6	61463.1			123	108
	1.501	1408.44	1066	2512	2113.81	407039			43328.4		32	5.084	1483.33	1020	4132	7541.36	1452176	18027.6	115444					67259.3	61697.1			124	109
	0.644	1230.32	1065	1597	792.261	152559			95793.5			7.047	1488.02	1020	2569	10486.2	2019244		409968					67681.8	61958			125	110
	3.625	1284.09	1064	1933	4654.58	896293			174258										109425					68940.8	62435.3			128	111
	0.55	1210.47	1067	1708	666.333	128310			124762		32	19.822	1766.34	1357	2991	35012.8	6742117	35012.8	61958					70771.8	62530.5			132	112
	1.049	1347.1	1064	2127	1413.13	272114			31763.3		33	0.608	1506.56	1360	1772	915.38	176267	32148.6	163189					70975.5	63353.8			133	113
	16.961	1355.64	1064	3703	22992.7	4427510			70771.8			14.614	1773.16	1357	2839	25912.1	4989675		514390					71134.9	64103.4			134	114
	5.598	1305.8	1064	2063	7310.15	1407653			31105.3			1.381	1582.91	1357	2030	2186.6	421055		198632					72328.2	64324.7			136	116
	0.753	1216.94	1064	1646	916.367	176457			68940.8			1.906	1644.63	1357	2479	3134.47	603579		64103.4					72911.4	64768.9			139	118
	1.101	1335.96	1066	1909	1470.82	283223			65644.6		34	13.066	2181.75	1357	4516	28506.7	5489291	71315.4	120215					74624.1	67150.2			142	122
	0.628	1784.41	1075	3972	1121.27	215914			192718			6.684	2139.82	1357	4182	14301.7	2753950		78494.4					78799.4	68035.5			147	126
17	14.733	1586.32	1064	3134	23371.2	4500393	33018.4		22957.4			14.276	1996.85	1357	4422	28507	5489350		254304					88968.5	68077.9			158	127
	6.678	1444.54	1064	3189	9647.16	1857672			33200.9		35	16.675	2145.24	1357	4254	35772.2	6888357	43408.8	67150.2					95793.5	69202.4			164	129
18	42.76	1572.59	1064	5046	67244.6	12948726	67244.6		55027.8			3.853	1981.82	1357	3179	7636.56	1470507		236034					99132.2	70447.6			172	130
19	2.28	1423.39	1064	2640	3245.04	624869	36295.5		78799.4		36	2.867	1688.94	1357	2419	4841.55	932295	34166.4	77651.9					99414.7	70605.1			173	131
	1.589	1455.11	1064	2654	2312.31	445262			108906			16.327	1796.07	1357	2875	29324.9	5646840		119195					101056	71315.4			175	135
	1.329	2109.1	1064	8246	2803.94	539930			37667.4		37	2.124	1771.32	1357	3325	3762.27	724469	49276.4	164718					107694	72637.6			179	137
	2.451	1483.64	1065	2563	3636.65	700278			72911.4			13.539	1998.47	1357	4142	27056.3	5210010		33093.6					108906	72798.3			180	138
	0.893	1438.71	1074	2153	1285.09	247458			88968.5			9.124	2022.92	1357	4046	18457.8	3554266		62435.3					117765	73018.9			189	140
	2.103	1508.11	1064	4071	3171.9	610785			67259.3		38	6.398	1897.04	1359	5719	12137.1	2337147	53595.8	70605.1					124051	73731.3			197	141
	0.727	1482.19	1070	2244	1077.61	207507			39136.6			14.411	2046.61	1357	4959	29493.6	5679337		47822.2					124762	76366.1			198	143
	8.823	1474.37	1064	4099	13008.6	2504947			48562.3			0.696	1805.16	1360	2829	1256.17	241891		18861.6					125362	77651.9			199	144
	0.94	1320.12	1064	1894	1240.86	238942			130540			2.685	1987.66	1357	3768	5336.59	1027622		134095					130540	78094.2			203	145
	1.267	1662.46	1066	2735	2106.55	405641			59218.2			2.82	1905.14	1359	2976	5372.26	1034491		48221.3					135669	78494.4			208	146
	1.672	1439.41	1065	2990	2406.98	463491			64153.7		39	5.266	1929.72	1359	3630	10161.6	1956741	20968.3	97244.2					141374	79285.8			211	148
20	4.347	1401.28	1064	2359	6090.88	1172869	16796.1		167615			2.103	1945.61	1358	3121	4092.06	787973		126324					164857	79524.1			220	149
	1.932	1351.43	1064	2181	2610.76	502731			67681.8			2.623	1732.56	1358	2461	4543.72	874945		48161					167615	80646.3			223	150
	5.427	1343.07	1064	2322	7288.6	1403504			196898			1.314	1652.27	1357	2698	2170.86	418025		177138					174258	80666.6			224	151
	0.623	1293.15	1067	1632	805.862	155178			135669		40	21.152	2029.54	1357	3991	42928.3	8266332	42928.3	88937.3					192718	83967			229	152
21	58.615	1419.97	1064	2773	83231.4	16027162	117765		66205.4		41	17.994	1998.14	1357	4176	35955	6923555	68035.5	33508.6					196898	84036.8			230	153
	18.913	1420.04	1064	2741	26857.8	5171782						11.897	2096.04	1357	4741	24937.6	4802027		32821.9					247173	84507.9			240	154
	2.519	1339.01	1064	1855	3372.54	649422						3.215	2222.04	1359	4349	7142.86	1375440		166793						84952.5				155
	3.095	1390.26	1064	2432	4303	828592					42	2.861	1725.46	1357	2721	4937.26	950726	32489	42001.4						88502.7				156
												11.461	1924.48	1357	5408	22057	4247321		49219.4						88937.3				157
22	1.07	1929.95	1312	3563	2064.63	397569	18904.6					2.067	1865.06	1357	3416	3854.83	742292		45499						89524.7				159
	3.988	1635.91	1310	2796	6524.58	1256383						0.909	1804.53	1358	2721	1639.96	315793		120760						92901.7				160
	3.869	1932.54	1310	3359	7476.8	1439743					43	19.672	1996.64	1357	3192	39277.3	7563291	39277.3	167504						93594.1				161
	1.548	1834.25	1316	2897	2838.61	546606													29507.1						93786.8				162
23	17.948	1827.14	1310	3738	32792.6	6314592	32792.6				44	39.489	2042.26	1223	6220	80646.3	15529378	80646.3	127507						94539.5				163
24	8.122	2212.59	1310	5084	17970.8	3460493	99132.2				45	16.088	1801.67	1223	5684	28985.9	5581566	42187.8	89524.7						96135.3				165
	39.483	2055.58	1310	5823	81161.4	15628549						2.114	1720.73	1226	2788	3636.95	700337		61463.1						96148.3				166
25	23.925	1911.31	1310	4763	45727.8	8805411	56881.2					5.136	1862.32	1223	4019	9564.92	1841836		102277						96547.7				167
	5.946	1875.74	1310	3536	11153.5	2147726					46	11.768	1971.22	1223	4255	23196.7	4466782	72637.6	122293						97154.8				168
26	25.696	2035.87	1310	4496	52313.1	10073485	52313.1					1.205	1757.47	1224	3809	2117.42	407733		72798.3						97244.2				169
27	25.41	1990.05	1310	4254	50567.2	9737301	51583.1					25.353	1866.59	1223	4528	47323.5	9112687		131641						98215.2				170
	0.519	1956.11	1311	4352	1015.84	195611					47	113.875	2140.57	1223	9655	243758	46938321	243758	68077.9						98427.8				171
28	43.898	2264.69	1310	5922	99414.7	19143441	99414.7				48	1.142	1755.94	1225	3012	2006.15	386308	34918.8	64324.7						100755				174
29	11.939	2391.28	1310	6006	28549.6	5497544	71134.9					17.028	1794.83	1223	3334	30563	5885251		42865.6						102277				176
	17.901	1919.08	1310	4872	34353	6615066						0.592	1806.37	1224	2986	1069.4	205926		115912						102641				177
	4.217	1952.26	1310	4044	8232.34	1585232						0.628	2037.46	1228	4417	1280.28	246533		188555						107694				178
30	48.717	2210.61	1310	12116	107694	20737755	107694				49	3.775	1768.71	1224	3226	6677.63	1285855	24637.9	93594.1						109425				181
												10.724	1674.79	1223	3242	17960.2	3458449		102641						110634				182
31	3.22	1485.8			4783.91	921197	33387.4				50	17.729	2048.17	1223	4087	36312.8	6992455	51330.3	183673						112805				183
	6.595	1536.3			10132.4	1951106						5.666	1929.62	1223	3685	10932.7	2105221		202567						114125				184
	7.582	1652.61			12530.1	2412816						2.129	1918.45	1223	4255	4084.74	786564		80666.6						115444				185
	3.594	1653.2			5941.02	1144012					51	9.358	1471.2	1223	2390	13767.6	2651102	27980.6	203117						115912				186
32	7.686	1669.51			12831.6	2470876	38964.4					2.031	1412.58	1223	1905	2868.26	552317		253142						116724				187
	5.577	1685.86			9402.8	1810617						1.205	1435.63	1225	2085	1729.66	333066		107694						117760				188
	7.675	1654.52			12699.2	2445386						1.667	1445.9	1223	1940	2410.31	464133		114125						119195				190
	2.649	1521.9			4030.75	776167						0.758	1587.3	1225	2170	1203.49	231746		96148.3						119577				191
33	0.914	1329.13			1214.82	233927	18449.5					1.599	1452.44	1223	1926	2323.16	447352		69202.4						120215				192
	8.2	1403.41			11507.9	2215981						1.49	1426.86	1226	1827	2126.64	409509		96547.7						120373				193
	1.189	1250.55			1487.19	286375						1.028	1508.84	1223	2059	1551.46	298751		163253						120760				194
	0.644	1270.23			817.967	157509					52	7.561	1627.37	1223	3874	12304.9	2369455	19788.7	116724						122293				195
	1.563	2188.97			3421.66	658880						1.309	1464.65	1223	2150	1916.75	369092		54027						122649				196
34	2.321	1533.65			3560.11	685541	25315.2					3.438	1619.34	1225	2571	5567.05	1072000		70447.6						126324				200
	2.358	1383.92			3262.84	628298					53	3.121	1632.98	1224	2901	5096.67	981423	24992.5	19539.1						127507				201
	8.169	1461.1			11935.4	2298306						0.748	1633.46	1225	2155	1221.53	235219		58719.5						129418				202
	4.617	1420.23			6556.8	1262586						10.423	1791.7	1223	2906	18674.3	3595945		139829						131641				204
35	9.389	1264.32	1004	2926	11870.9	2285882	12763.8				54	1.226	1712.59	1224	2425	2098.92	404171	20856.7	50935.2						132777				205
	0.722	1236.89	1050	1568	892.847	171928						5.728	1799.12	1223	3397	10305.4	1984424		120373						134042				206
36	33.241	1830.21	1022	4677	60838.7	11715195	64430.3					5.209	1622.73	1223	2878	8452.34	1627596		119577						134095				207
	2.015	1782.46	1031	4423	3591.54	691593													92901.7						139829				209
37	12.827	1608.58	1014	5269	20633.3	3973183	72328.2				55	49.994	4300.89	2492	14159	215020	41404651	215020	88502.7						140176				210
	32.426	1594.24	992	4036	51694.9	9954438					56	31.123	3856.85	2492	8688	120035	23114114	129418	55726.9						152372				212
38	0.727	1266.55	1047	1802	920.833	177317	52666.1					2.524	3717.68	2492	7297	9382.95	1806794		84036.8						154530				213
	8.231	1272.51	1013	2064	10474.2	2016924					57	19.957	3174.47	2492	16383	63353.8	12199499	63353.8	97154.8						155535				215
	1.413	1269.34	1050	1715	1792.99	345261					58	26.553	4095.09	2492	10071	108735	20938218	115444	84952.5						155535				214
	7.437	1324.43	1013	2227	9849.27	1896590						2.347	2858.22	2493	5443	6709.11	1291916		73018.9						156845				216
	20.207	1252.53	894	3895	25309.2	4873579					59	92.049	4453.82	2492	10797	409968	78944053	409968	209103						163189				217
	2.181	1331.06	1047	1926	2903.21	559047					60	16.535	3787.77	2492	7757	62630.7	12060267	109425	64768.9						163253				218
	1.075	1317.6	1038	1947	1416.39	272743						1.895	3661.72	2493	5575	6940.78	1336527		154530						164718				219
39	7.722	1652.06	1046	3642	12757.6	2456615	52625.7					10.07	3957.83	2492	9207	39853.4	7674224		152372						166793				221
	23.473	1698.47	1007	3721	39868.1	7677067					61	15.481	2315.25	1939	3806	35841.9	6901765	61958	58310.9						167504				222
40	32.847	1503.85	967	3047	49396.5	9511864	49396.5					10.459	2497	1940	4286	26116.1	5028951		76366.1						177138				225
41	3.817	1452.18	1017	2643	5542.92	1067352	20044.4												251611						177667				226
	6.273	1502.55	1005	4127	9425.95	1815075					62	12.957	4764.43	3179	8082	61732.3	11887264	163189	78094.2						183673				227
	2.674	1561.7	1048	2556	4176.72	804276						21.775	4659.33	3178	7876	101456	19536561		25155.8						188555				228
	0.691	1301.32	1043	1801	898.804	173075					63	18.913	6224.32	3178	14512	117723	22668964	514390	5030.21						198513				231
												59.794	6633.9	3178	16383	396667	76382715		198513						198632				232
42	96.92	1681.35	922	5981	162956	31378976	164857				64	37.256	5331.6	3178	16383	198632	38248902	198632	61697.1						202567				233
	1.516	1253.87	1036	1742	1901.36	366129					65	11.368	4474.88	3178	8262	50869.5	9795511	64103.4	156845						202951				234
43	16.597	1588.45	1020	3193	26364.1	5076703	52758.8					1.625	4038.67	3182	6593	6564.68	1264104		177667						203117				235
	17.2	1534.6	983	2972	26394.7	5082607						0.888	4229.29	3196	5874	3755.73	723209		57760.3						209103				236
44	3.713	1427.86	1025	2692	5301.78	1020918	42191.4					0.706	4125.14	3184	6360	2913.45	561019		79524.1						215020				237
	1.065	1399.16	1031	2241	1489.54	286828					66	2.934	4803.53	3179	8685	14094.2	2713997	120215	24306.3						236034				238
	8.48	1556.63	1023	2965	13200.9	2541977						21.583	4916.92	3178	16383	106120	20434714		79285.8						243758				239
	14.868	1493.09	1012	3227	22199.2	4274718					67	10.012	4792.28	3179	10128	47982.1	9239512	78494.4	24877.9						251611				241
45	35.277	1467.05	995	4052	51753.1	9965662	51753.1					6.575	4640.98	3178	8437	30512.3	5875485		117760						253142				242
46	14.91	1402.5	992	6591	20910.7	4026588	23331.7				68	44.147	5760.39	3178	11742	254304	48969084	254304	140176						254304				243
	0.509	1405.86	1036	2019	715.481	137774					69	12.562	4142.55	3178	8600	52039.6	10020827	67150.2	202951						330742				244
	1.189	1434.17	1037	2358	1705.56	328425						1.968	4291.34	3180	6977	8446.23	1626419		110634						409968				245
47	29.642	1507.25	968	5482	44678.6	8603376	47953.7					1.599	4166.54	3183	6413	6664.33	1283293		100755						514390				246
	2.166	1512.35	1034	2530	3275.06	630650					70	44.843	5263.57	3178	12996	236034	45450967	236034
48	21.77	1465.2	1011	4067	31897	6142133	47423.7				71	6.029	4509.52	3178	8471	27189	5235555	77651.9
	0.535	1233.23	1034	1744	659.649	127023						7.135	5130.54	3180	8366	36608.4	7049365
	9.005	1500.07	1023	2961	13508	2601114						3.064	4521.78	3181	8219	13854.5	2667852
	0.997	1363.1	1035	2222	1359.13	261716
49	19.947	1449.28	975	4464	28908.7	5566693	49120				72	14.343	3210.04	1994	7135	46043.1	8866127	119195
	14.354	1408.08	978	2821	20211.3	3891925						22.907	3193.44	1994	7838	73152	14086258
50	3.448	1431.4	995	3117	4935.82	950448	40397.3				73	53.048	3105.08	1994	13700	164718	31718410	164718
	6.819	1465.27	991	3065	9991.11	1923903					74	8.813	2409.15	1994	3611	21231.3	4088335	33093.6
	16.151	1577.04	1002	4138	25470.3	4904606						4.035	2483.4	1994	3536	10020.7	1929603
51	3.324	1376.19	1034	2289	4573.94	880765	27214.3					0.815	2258.66	1995	2978	1841.54	354609
	3.552	1351.86	961	2060	4801.96	924673					75	23.618	2643.5	1994	4752	62435.3	12022631	62435.3
	6.242	1343.27	991	2329	8384.92	1614613					76	4.227	3131.05	1994	6729	13235.6	2548671	70605.1
	2.674	1352.94	974	2226	3618.39	696763						2.83	3206.77	1996	6980	9076.01	1747690
	2.467	1324.26	1034	2077	3266.62	629025						3.407	3307.16	1997	6285	11266.5	2169499
	0.525	1913.8	1034	5213	1003.8	193294						10.199	2981.97	1994	6677	30414.2	5856596
	0.514	1392.6	1038	2169	715.964	137867						1.376	3635.71	1995	14574	5003.4	963463
	0.68	1247.58	1036	1659	848.732	163433						0.55	2923.68	2020	4550	1609.41	309910
											77	8.231	2919.82	1994	6134	24033.4	4627909	47822.2
52	55.24	2269.42	1446	7353	125362	24139850	125362					1.314	3048.2	1994	11359	4004.93	771195
53	5.287	1821.6	1446	3867	9630.09	1854385	141374					1.303	2752.64	1994	5308	3588.01	690913
	62.666	2102.33	1446	4241	131744	25368816						0.81	2798.74	2001	5806	2267.35	436604
54	5.583	1899.32	1449	3215	10603.2	2041771	13333.3					1.553	2789.72	1994	4499	4331.73	834125
	0.763	1716.73	1446	2244	1310.54	252360						3.266	2937.94	1994	5122	9596.76	1847966
	0.556	2554.74	1454	6371	1419.58	273357					78	2.804	3137.29	1996	5915	8797.89	1694135	18861.6
55	111.237	2222.03	1446	8152	247173	47595918	247173					1.246	2568.8	1994	3659	3201.64	616513
56	15.242	1928.45	1446	4618	29393.2	5660005	124051					1.636	2506.04	1997	3538	4099.49	789403
	45.528	2079.1	1446	6227	94658.1	18227494						1.179	2343.44	1995	3264	2762.55	531961
57	3.355	1758.74	1446	2944	5900.17	1136145	58953.1				79	18.83	3094.33	1994	7426	58267.2	11220026	134095
	2.706	2065.78	1446	3596	5589.22	1076269						0.878	3127.59	2000	5332	2744.91	528563
	1.298	1829.18	1446	3130	2374.8	457296						7.208	2806.19	1994	9073	20227.3	3894994
	21.443	1956.45	1446	12228	41951.2	8078179						1.329	2680.73	1995	5273	3563.88	686266
	1.454	2157.85	1447	8324	3137.69	604198						12.349	3040.19	1994	6804	37544.2	7229567
58	0.883	1835.4	1447	3165	1620.36	312018	61210.7					0.945	2866.01	1994	8475	2708.81	521613
	11.202	1789.54	1446	3756	20045.7	3860037						2.706	3340.53	1998	6648	9038.23	1740414
	13.554	1809.47	1446	2914	24525.8	4722724					80	3.822	3133.26	1995	6628	11975.8	2306080	48221.3
	1.579	1805.81	1446	2798	2850.86	548965						6.881	2883.58	1994	4935	19841.7	3820747
	6.845	1777.75	1446	3075	12167.9	2343078						5.058	3243.06	1994	5301	16403.8	3158741
59	8.548	1889.38	1446	5034	16150.3	3109922	43328.4				81	20.451	3831.34	1994	10627	78353.2	15087806	97244.2
	6.876	2514.27	1446	16383	17287.4	3328891						5.557	3399.7	1996	8509	18891	3637677
	4.238	1875.54	1447	2969	7947.82	1530444					82	39.769	3176.45	1994	9952	126324	24325224	126324
	1.049	1852.07	1451	2946	1942.85	374118
											84	5.302	2819.92	1858	5220	14951.8	2879141	48161
60	29.741	2398	1726	5803	71319.2	13733323	95793.5					11.721	2833.32	1856	5382	33209.2	6394812
	5.894	2348.78	1726	4755	13844.2	2665866					85	59.415	2981.38	1856	9922	177138	34110004	177138
	4.513	2355.53	1726	5297	10630.1	2046954					86	10.578	2394.17	1856	3824	25326.6	4876924	88937.3
61	66.607	2616.2	1726	7599	174258	33555434	174258					10.76	2315.28	1856	5385	24912.9	4797271
62	48.997	2546.31	1726	16383	124762	24024396	124762					17.158	2255.36	1856	4057	38697.8	7451701
63	1.309	2396.49	1728	3932	3136.22	603916	31763.3				87	12.354	2490.64	1856	4627	30770.6	5925231	33508.6
	6.891	2339.7	1726	7234	16123.6	3104776						1.158	2364.28	1857	3983	2738	527234
	2.654	2258.05	1728	3555	5992.19	1153865					88	2.784	2306.24	1856	3804	6419.47	1236143	32821.9
	1.085	2363.37	1726	4758	2565.13	493945						2.077	2341.19	1857	6196	4863.26	936477
	1.719	2295.71	1731	3656	3946.17	759880						9.114	2363.32	1857	3844	21539.2	4147617
64	16.493	2441.78	1726	6385	40273.4	7755102	70771.8				89	29.803	2730.3	1856	5393	81372.5	15669214	166793
	2.02	2793.29	1728	12519	5642.82	1086590						28.199	2847.54	1856	6029	80297.1	15462128
	6.201	2569.27	1726	4920	15931.1	3067713						1.085	2532.2	1867	4130	2748.37	529230
	1.558	2444.64	1726	4921	3808.61	733391						0.924	2569.34	1856	4542	2375.04	457342
	0.717	2324.92	1728	3681	1666.16	320839					90	7.141	2594.68	1857	4187	18527.5	3567684	42001.4
	1.49	2314.56	1726	3821	3449.7	664279						9.966	2355.48	1856	3715	23473.9	4520167
65	1.802	2341.84	1726	4069	4220.05	812618	31105.3				91	11.248	2704.7	1856	6479	30423.5	5858390	49219.4
	8.834	2525.25	1726	4676	22306.9	4295444						2.181	2777	1857	5491	6056.98	1166340
	1.984	2307.92	1726	3497	4578.41	881625						4.129	2772.58	1856	4983	11446.8	2204204
												0.525	2463.61	1865	3927	1292.18	248825
66	5.468	2501.89	1740	16332	13681.3	2634487	68940.8				92	2.747	2180.15	1856	3209	5989.26	1153301	45499
	3.957	2448.43	1741	4388	9688.87	1865703						11.098	2493.62	1857	6481	27673.5	5328857
	1.122	2118.37	1741	2989	2376.22	457568						5.292	2236.7	1860	3640	11836.2	2279196
	1.407	2124.22	1741	3236	2989.5	575663
	17.906	2245.34	1740	4599	40204.9	7741919					93	8.73	3571.12	2186	7087	31174.7	6003048	120760
67	19.241	2569.09	1740	5620	49430.8	9518471	65644.6					26.397	3393.81	2186	7658	89585.6	17250744
	6.273	2584.56	1740	4641	16213.8	3122145					94	43.498	3850.87	2186	7089	167504	32254905	167504
68	32.109	2817.25	1740	7361	90459.8	17419063	192718				95	9.929	2971.72	2186	5220	29507.1	5681935	29507.1
	39.364	2597.76	1740	8089	102258	19691047					96	6.258	3214.26	2186	5785	20114	3873189	127507
69	8.454	2296.08	1741	5121	19412.1	3738024	22957.4					22.995	3122.53	2186	6029	71803.4	13826561
	1.002	2156.16	1742	3066	2161.07	416139						1.428	2688.82	2191	4049	3839.95	739427
	0.665	2082.34	1744	3221	1384.18	266540						3.282	2869.12	2187	4720	9416.66	1813286
70	1.994	2620.43	1741	4879	5225.59	1006247	33200.9					7.473	2988.47	2187	5238	22332.6	4300402
	2.649	2354.26	1743	4214	6235.26	1200670					97	7.624	3137.85	2187	14431	23921.5	4606364	89524.7
	8.532	2547.96	1740	7207	21740	4186294						17.932	3229.86	2186	5893	57917.6	11152691
71	17.864	2114.06	1740	3911	37766.5	7272375	55027.8					2.306	3333.23	2188	6262	7685.63	1479956
	6.294	2132.35	1740	3951	13421.2	2584406					98	4.144	3171.7	2190	5813	13143.9	2531018	61463.1
	1.651	2325.34	1741	4556	3840.12	739459						16.166	2988.89	2186	5569	48319.2	9304407
72	5.276	2509.83	1740	4624	13242.5	2549989	78799.4				99	14.385	3318.53	2186	7392	47737.1	9192328	102277
	3.921	2568.54	1740	5355	10070.8	1939245						1.002	3090.2	2187	5998	3097.23	596408
	3.962	2492.76	1740	4851	9877.26	1901980						14.52	3542.89	2186	8096	51442.9	9905922
	18.275	2495.74	1740	7869	45608.8	8782505
73	10.859	2338.91	1740	4630	25397.9	4890658	108906				100	36.02	3395.17	2064	8705	122293	23548891	122293
	31.912	2616.84	1740	6624	83508.4	16080502					101	24.122	3017.9	2064	9899	72798.3	14018149	72798.3
74	4.051	2001.69	1740	2765	8108.17	1561321	37667.4				102	27.524	3202.66	2064	8643	88148.8	16974071	131641
	12.77	2314.75	1740	5718	29559.3	5691977						12.396	3508.53	2065	9244	43491.9	8374869
75	15.528	2279.29	1740	4538	35391.8	6815090	72911.4				103	6.497	3153.66	2064	7557	20488.2	3945234	68077.9
	2.082	2275.24	1741	4035	4738.07	912370						12.874	3233.92	2064	7128	41632.8	8016881
	5.411	2289.08	1741	3695	12386.8	2385226						1.989	2994.97	2064	6203	5956.92	1147074
	7.904	2338.04	1740	4198	18479.8	3558497					104	22.481	2861.27	2064	5600	64324.7	12386453	64324.7
	0.909	2107.12	1740	2922	1914.95	368746					105	4.653	2872.8	2067	5184	13367.3	2574029	42865.6
												1.849	2788.69	2065	4955	5155.62	992773
76	8.127	2800.12	1850	5338	22757.3	4382185	88968.5					7.099	3001.37	2064	5154	21306.8	4102872
	5.749	2879.02	1850	5394	16550.9	3187072						1.085	2797.05	2076	4720	3035.82	584583
	4.269	2644.7	1852	4814	11289.6	2173943
	14.473	2651.13	1850	5803	38370.7	7388709					107	33.761	3433.35	2477	5506	115912	22320187	115912
77	8.891	3062.09	1853	8165	27224	5242296	67259.3				108	47.917	3935.02	2476	6593	188555	36308435	188555
	3.495	2950.8	1850	15304	10313	1985885					109	6.253	3908.54	2476	7571	24438.4	4705887	93594.1
	10.173	2921.58	1850	9567	29722.3	5723373						10.464	4072.26	2476	7799	42612.9	8205595
78	0.571	2541.66	1853	3548	1451.91	279582	39136.6					6.808	3898.65	2477	11553	26542.8	5111129
	0.602	2495.39	1850	3964	1503.23	289465					110	29.668	3459.61	2476	6059	102641	19764733	102641
	0.763	2522.72	1878	4548	1925.83	370840					111	46.307	3911.91	2476	13862	181150	34882463	183673
	3.183	2527.58	1850	4018	8046.29	1549405						0.779	3239.47	2480	4508	2523.45	485920
	8.325	2604.76	1850	4682	21683.6	4175430					112	49.724	4073.8	2476	9508	202567	39006678	202567
	1.729	2617.06	1854	4761	4525.73	871482					113	3.557	3397.42	2477	6499	12085.7	2327232	80666.6
79	6.575	2683.48	1850	5264	17642.6	3397284	48562.3					2.446	3631.32	2477	6465	8882.11	1710353
	9.903	2597.13	1850	6923	25720.3	4952731						0.649	3414.77	2476	8211	2216.67	426846
	2.114	2459.99	1851	4156	5199.47	1001218						14.977	3838.02	2476	7343	57482.1	11068840
80	46.333	2817.42	1850	7764	130540	25137047	130540				114	2.124	3481.55	2478	5741	7394.8	1423954	203117
81	6.175	2602.08	1850	4122	16067	3093877	59218.2					46.048	4098.62	2476	6551	188732	36342439
	2.841	2399.8	1851	4163	6816.98	1312688						2.077	3365.34	2476	4999	6990.69	1346137
	7.369	2550.4	1850	5283	18794.1	3619021
	4.913	2417.31	1850	4138	11875.6	2286775					116	23.359	3998.93	2401	9919	93410	17987171	253142
	2.124	2666.93	1851	4881	5664.55	1090774						41.904	3811.9	2401	9735	159732	30758235
82	17.761	2887.52	1850	10279	51283.9	9875309	64153.7				117	30.66	3512.48	2401	9054	107694	20737672	107694
	4.913	2619.68	1851	5158	12869.8	2478218					118	5.541	3193.8	2401	5489	17697.1	3407781	114125
83	9.909	2760.53	1850	5344	27352.8	5267086	167615					27.705	3480.45	2401	8146	96427.5	18568226
	53.199	2636.57	1850	7984	140262	27009078					119	10.324	3566.92	2401	8523	36824.8	7091043	96148.3
84	20.586	2406.66	1850	4166	49542.5	9539980	67681.8					17.345	3420.18	2401	7156	59323.4	11423410
	7.499	2418.93	1850	4771	18139.3	3492933					120	14.598	3723.38	2401	7300	54353.7	10466422	69202.4
85	68.503	2638.85	1850	10253	180769	34809092	196898					4.362	3403.92	2405	6102	14848.7	2859291
	5.78	2790.54	1852	5151	16129.2	3105867					121	18.945	3589.37	2401	6186	67999.1	13094016	96547.7
86	41.286	2782.65	1850	7548	114883	22122047	135669					8.709	3278.09	2401	5461	28548.6	5497352
	7.016	2962.73	1850	6841	20786.4	4002652					122	45.004	3627.54	2401	16383	163253	31436257	163253
87	25.55	2591.18	1850	7441	66205.4	12748608	66205.4				123	14.738	4136.4	2401	8752	60962.8	11739091	116724
												3.272	3967.01	2401	8116	12978.8	2499218
												2.913	3632.21	2402	6867	10581.9	2037669
												8.439	3815.74	2401	7624	32200.5	6200583
											124	15.751	3430.11	2401	6053	54027	10403519	54027
											125	19.313	3647.62	2401	6822	70447.6	13565486	70447.6
											126	5.562	3122.61	2402	4540	17367.5	3344311	19539.1
												0.774	2806.45	2404	3827	2171.57	418161
											128	19.35	3034.65	2484	5072	58719.5	11307109	58719.5
											129	5.011	3515.57	2484	7187	17617.9	3392520	139829
												4.876	3486.27	2484	5905	17000.3	3273606
												26.283	4003.08	2484	8207	105211	20259570
											130	1.023	3414.17	2486	4930	3492.87	672592	50935.2
												4.83	3494.16	2485	5342	16875.5	3249573
												8.403	3637.82	2487	6580	30566.8	5885985
											131	30.733	3916.72	2484	8771	120373	23179155	120373
											132	29.637	4034.68	2484	9785	119577	23025907	119577
											133	25.81	3599.45	2484	6833	92901.7	17889290	92901.7
											134	24.371	3631.41	2484	6186	88502.7	17042212	88502.7
											135	9.68	4298.51	2485	9007	41609.7	8012420	55726.9
												3.817	3698.54	2487	6687	14117.2	2718425
											136	7.956	3871.58	2484	7291	30801.9	5931255	84036.8
												5.712	3939.02	2489	6911	22501.5	4332925
												4.684	3739.17	2486	9632	17515.1	3372735
												3.765	3510.8	2485	6277	13218.3	2545333
											138	1.47	3657.91	2494	5583	5375.89	1035189	97154.8
												18.036	3948.1	2488	7611	71207.1	13711740
												2.269	3938.86	2492	7046	8938.86	1721280
												3.303	3522.12	2488	5832	11633	2240069
											139	19.822	3982.77	2488	8483	78947.5	15202239	84952.5
												1.766	3401	2494	5009	6005.04	1156339
											140	15.039	3732.17	2488	7041	56129.4	10808365	73018.9
												4.544	3716.88	2491	7248	16889.5	3252268
											141	46.946	4454.11	2488	8821	209103	40265190	209103
											142	9.239	3822.28	2488	7703	35312.6	6799837	64768.9
												5.967	3396.61	2490	6719	20267.3	3902705
												2.815	3264.68	2488	4913	9189.06	1769458
											143	38.995	3962.79	2488	16383	154530	29756601	154530
											144	40.429	3768.9	2488	10345	152372	29340913	152372
											145	1.574	3439	2490	5878	5411.34	1042016	58310.9
												15.481	3417.11	2488	5751	52899.6	10186419
											146	18.436	4142.3	2490	10214	76366.1	14705176	76366.1
											148	53.235	4726.42	2612	8811	251611	48450558	251611
											149	3.936	3988.22	2613	6450	15699.2	3023068	78094.2
												3.23	4150.62	2613	7363	13407.1	2581683
												10.521	4269.83	2614	8664	44924.2	8650668
												1.106	3673.78	2623	5222	4063.71	782514
											150	3.988	3159.58	2612	4484	12601.5	2426560	25155.8
												1.968	3872.03	2623	8581	7620.95	1467501
												0.639	4645.72	2612	9085	2967.48	571423
												0.644	3052.8	2617	3932	1965.85	378547
											151	0.893	2866.59	2624	3511	2560.5	493054	5030.21
												0.852	2899.82	2613	3403	2469.7	475570
											152	54.393	3649.6	2612	6879	198513	38225942	198513
											153	15.917	3876.18	2612	10051	61697.1	11880489	61697.1
											154	36.944	4245.48	2612	12235	156845	30202373	156845
											155	37.484	4521	2612	11234	169466	32632574	177667
												1.968	4167.03	2613	7509	8201.56	1579305
											156	16.706	3457.38	2612	6027	57760.3	11122403	57760.3
											157	14.141	3683.4	2612	7727	52086.8	10029902	79524.1
												6.689	4102.01	2612	8382	27437.4	5283383
											158	6.076	3555.23	2612	5736	21601.5	4159621	24306.3
												0.862	3137.56	2615	4224	2704.77	520835
											160	18.436	2570.18	2054	4344	47382.9	9124120	79285.8
												12.64	2523.94	2054	3822	31902.9	6143264
											161	9.368	2350.07	2054	3340	22016.5	4239532	24877.9
												0.613	2240.64	2054	2625	1373.04	264395
												0.644	2311.32	2061	2773	1488.37	286603
											162	37.687	3124.71	2054	7190	117760	22676051	117760
											163	41.914	3344.38	2054	8317	140176	26992481	140176
											164	53.474	3795.34	2054	8636	202951	39080588	202951
											165	14.26	3150.29	2055	6680	44924.4	8650708	110634
												20.71	3172.81	2054	6979	65709.8	12653176
											166	23.317	3080.48	2054	16383	71828.3	13831372	100755
												10.807	2676.71	2057	4875	28927	5570235

## Sheet: Fig.5e
aso	Area	Mean	Min	Max	IntDen	RawIntDen	signal intensity proportion in FCs	scr	Area	Mean	Min	Max	IntDen	RawIntDen	signal intensity proportion in FCs
1	0.048	24.798	0	85	1.19	107078		13	0.008	19.67	0	85	0.16	14418			Table Analyzed	Data 1
2	0.928	2.778	0	85	2.578	231986	0.461571	14	0.176	2.352	0	85	0.415	37348	0.386045
1	0.025	22.019	0	85	0.543	48905		1	0.004	16.773	0	72	0.06	5401			Column B	ASO-SNUL
2	0.44	2.963	0	85	1.304	117334	0.416802	2	0.125	1.509	0	73	0.188	16951	0.318624		vs.	vs.
1	0.035	39.372	0	85	1.395	125517		3	0.004	21.149	0	81	0.083	7508			Column A	Ctr-ASO
2	0.504	6.331	0	85	3.192	287240	0.436976	4	0.234	1.308	0	85	0.306	27496	0.273058
3	0.025	14.364	0	82	0.36	32363		5	0.011	21.312	0	85	0.235	21184			Mann Whitney test
4	0.436	2.027	0	82	0.883	79458	0.407297	6	0.472	1.875	0	85	0.884	79579	0.266201		P value	0.0066
7	0.069	16.617	0	85	1.148	103343		7	0.015	14.216	0	72	0.212	19121			Exact or approximate P value?	Exact
8	1.424	2.509	0	85	3.573	321573	0.321367	8	0.292	1.758	0	72	0.513	46127	0.414529		P value summary	**
9	0.011	33.838	0	85	0.371	33398		9	0.034	18.141	0	85	0.622	55965			Significantly different (P < 0.05)?	Yes
10	0.218	5.051	0	85	1.1	99004	0.33734	10	1.269	1.511	0	85	1.918	172585	0.324275		One- or two-tailed P value?	Two-tailed
11	0.014	28.164	0	85	0.382	34388		11	0.018	13.789	0	85	0.241	21731			Sum of ranks in column A,B	120 , 205
12	0.608	2.615	0	85	1.591	143205	0.240131	12	0.453	1.163	0	85	0.528	47475	0.457736		Mann-Whitney U	29
1	0.008	48.153	0	85	0.377	33948		1	0.014	22.759	0	85	0.319	28676
2	0.142	6.122	0	85	0.869	78171	0.434279	2	0.462	1.923	0	85	0.889	80014	0.358387		Difference between medians
1	0.045	16.355	0	70	0.73	65730		1	0.009	17.716	0	85	0.163	14669			Median of column A	0.3243, n=13
2	0.853	1.644	0	85	1.402	126166	0.52098	2	0.227	2.332	0	85	0.53	47692	0.307578		Median of column B	0.4265, n=12
1	0.023	14.933	0	58	0.336	30239		1	0.004	17.057	0	71	0.073	6550			Difference: Actual	0.1022
2	0.194	3.003	0	58	0.581	52329	0.577863	2	0.227	0.869	0	71	0.197	17760	0.368806		Difference: Hodges-Lehmann	0.1076
1	0.022	10.161	0	60	0.219	19692		1	0.006	10.689	0	81	0.066	5975
2	0.191	2.741	0	64	0.523	47038	0.41864	2	0.142	2.885	0	85	0.409	36835	0.16221
1	0.031	12.914	0	72	0.396	35629		1	0.006	11.875	0	85	0.075	6745
2	0.221	2.855	0	72	0.631	56759	0.627724	2	0.142	2.924	0	85	0.415	37340	0.180637
								1	0.021	16.288	0	85	0.35	31468
								2	0.458	2.327	0	85	1.066	95898	0.32814

## Sheet: Fig.5f
# of FC/DFC unit
110920			101820			100220			10145ets_2			10145ets_3			51121		040922_1			040922_2		040922_3						summary
ASO901	Scr		ASO901	Scr		ASO901	Scr		ASO901	SCR		ASO901	Scr		ASO901	Scr	ASO901	Scr		ASO901	Scr	ASO901	Scr					ASO901	Scr
12	29		57	100		6	22		55	24		17	2		28	20	19	8		34	19	3	9					16	18.2917		Column B	Scr
9	5		49	108		20	5		45	11		56	6		12	4	3	6		58	4	9	61					35.6667	28.6429		Column B	Scr
19	15		60	2		59	10		19	3		58	5		9	22	8	5		6	11	8	7					19.5882	17.9375		vs.	vs.
3	3		47	38		52	15		5	11		48	7		12	10	8	22		9	16	28	7					32.3333	13.25		Column A	ASO901
6	14		70	8		4	24		51	13		20	4		23	10	12	21		34	6	6	17					29.5454	17.1923
4	4		23	5		18	20		8	5		45	8		21	6	20	12		5	10	6	25					13.8333	11.3684		Paired t test
5	8		48	11		22	11		34	12		28	35		24	11	10	7		6	5	16	9					18.1176	14.4762		P value	0.0307
23	18		44	9		3	18		51	4		11	5		10	10	37	15		11	13	2	26					18.3684	11.7		P value summary	*
5	25		57	4		6	13		34	12		10	11		15	9	19	7		10	12	4	13					16.1923	15.2692		Significantly different (P < 0.05)?	Yes
10	41		14	59		52	24		53	7		10	4		19	26	19	14		10	10	20	16								One- or two-tailed P value?	Two-tailed
3	3		3	8		21	13		30	6		22	2		8	15	28	17		11	5	7	17								t, df	t=2.619, df=8
16	8		4	19		18	29		3	76			9		10	9	8	9		17	5	14	19
11	25		48	10		5	4			4			10		18	15	43	7		10	23	19	10
20	46		63	20		13	19			8			5		8	13	26	15		26	22	6	25
2	53		20			7	10			7			7		9	5	5	29		37	4	82	7
42	2		23			10	50			9			14		29	12	6	23		6	4	16	30
23	14		9			17							4		29	10	37	7		7	20	23	12
30	14		3										8		12	6		18		29	7	7	20
64	9												4		20	3		18		23	3	3	5
13	16												12		13			3			35	31	18
	51												6		10			41				10	2
	2												67		4							10	13
	9												22		6							24	7
	25												13		8							27	10
16	18.2917		35.6667	28.6429		19.5882	17.9375		32.3333	13.25		29.5455	53		13		18.1176	14.4762		18.3684	11.7	22	8
													124		4							18	4
															14
													17.1923		14							16.1923	15.2692
															4
															9
															13.8333	11.3684

## Sheet: Fig.5h
Ctrl-ASO DFC								ASO-SNUL DFC	Area	mean	min	max	IntDen	RawIntDen					Ctr-ASO FC	Area	mean	min	max	IntDen	RawIntDen		ASO-SNUL FC	Area	mean	min	max	IntDen	RawIntDen	Column B	ASO-SNUL
	Area	mean	min	max	IntDen	RawIntDen		1	101	33.891	20	51	3423	3423	Table Analyzed	Data 1			1	40	41.2	25	59	1648	1648		1	47	32.17	18	47	1512	1512	vs.	vs.
1	107	30.879	19	60	3304	3304		2	85	35.012	21	50	2976	2976					2	47	30	17	47	1410	1410		2	56	41.625	24	64	2331	2331	Column A	Ctr-ASO
2	123	41.593	25	64	5116	5116		3	80	33.7	8	61	2696	2696	Column B	ASO-SNUL			3	37	47.189	28	73	1746	1746		3	38	40.079	24	65	1523	1523
3	170	38.606	23	59	6563	6563		4	70	31.129	20	47	2179	2179	vs.	vs.			4	36	27.222	16	43	980	980		4	51	34.706	21	54	1770	1770	Mann Whitney test
4	170	41.647	19	66	7080	7080		5	62	29.387	21	40	1822	1822	Column A	Ctr-ASO			5	31	20.839	12	33	646	646		5	66	35.803	20	54	2363	2363	P value	0.0025
5	132	42.28	25	69	5581	5581		6	43	34.442	25	49	1481	1481					6	48	46.896	27	77	2251	2251		6	52	31.75	19	49	1651	1651	Exact or approximate P value?	Exact
6	110	24.8	13	45	2728	2728		7	134	22.507	12	42	3016	3016	Mann Whitney test				7	47	53.468	32	77	2513	2513		7	43	35.674	21	57	1534	1534	P value summary	**
7	93	41.398	26	63	3850	3850		8	131	29.221	18	45	3828	3828	P value	<0.0001			8	36	30.111	18	47	1084	1084		8	52	29.25	17	49	1521	1521	Significantly different (P < 0.05)?	Yes
8	131	41.313	28	63	5412	5412		9	140	30.036	19	46	4205	4205	Exact or approximate P value?	Exact			9	40	33.5	20	54	1340	1340		9	43	28.186	16	44	1212	1212	One- or two-tailed P value?	Two-tailed
9	161	36.304	24	62	5845	5845		10	94	25.681	16	39	2414	2414	P value summary	****			10	40	26.625	14	45	1065	1065		10	47	32.894	18	52	1546	1546	Sum of ranks in column A,B	301 , 519
10	170	34.629	7	60	5887	5887		11	96	22.979	14	37	2206	2206	Significantly different (P < 0.05)?	Yes			11	37	38.865	22	59	1438	1438		11	26	20.654	12	32	537	537	Mann-Whitney U	91
11	194	28.969	12	50	5620	5620		12	106	23.377	14	34	2478	2478	One- or two-tailed P value?	Two-tailed			12	45	31.733	18	50	1428	1428		12	53	37.623	22	57	1994	1994
12	139	31.871	20	46	4430	4430		13	143	30.231	13	46	4323	4323	Sum of ranks in column A,B	562.5 , 298.5			13	38	28.763	16	48	1093	1093		13	58	24.517	15	37	1422	1422	Difference between medians
13	185	32.811	20	46	6070	6070		14	132	38.212	24	55	5044	5044	Mann-Whitney U	67.5			14	40	36.3	20	60	1452	1452		14	48	23.542	14	41	1130	1130	Median of column A	38.50, n=20
14	204	29.99	19	44	6118	6118		15	134	33.104	21	46	4436	4436					15	31	19.903	11	35	617	617		15	68	40.515	23	57	2755	2755	Median of column B	49.50, n=20
15	211	25.938	15	40	5473	5473		16	95	27.789	16	50	2640	2640	Difference between medians				16	53	26.774	16	46	1419	1419		16	57	36.632	21	55	2088	2088	Difference: Actual	11
16	90	32.489	19	48	2924	2924		17	103	24.816	14	46	2556	2556	Median of column A	144.5, n=20			17	39	21.538	13	36	840	840		17	48	20.688	12	35	993	993	Difference: Hodges-Lehmann	11
17	137	29.701	15	51	4069	4069		18	105	33.99	21	55	3569	3569	Median of column B	101.0, n=21			18	31	27.581	15	47	855	855		18	27	19.185	10	35	518	518
18	135	26.089	15	41	3522	3522		19	94	29.947	18	44	2815	2815	Difference: Actual	-43.5			19	34	39.353	22	61	1338	1338		19	33	16.273	10	25	537	537
19	166	28.048	9	47	4656	4656		20	86	23.872	14	36	2053	2053	Difference: Hodges-Lehmann	-43			20	37	31.676	18	50	1172	1172		20	52	24.077	14	35	1252	1252
20	150	41.507	20	65	6226	6226		21	131	28.183	16	47	3692	3692
