# Supplementary material for: Monoallelically expressed noncoding RNAs form nucleolar territories on NOR-containing chromosomes and regulate rRNA expression
Source: eLife journal article supplement (doi:10.7554/elife.80684), 2024-01-19
Supplement: supp [file Figure 5J_Northern bolt with labels.docx]

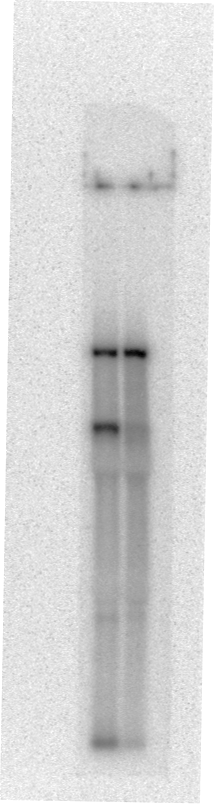


Northern blot using 5-ETS-1 probe from total RNA isolated from control and SNUL-depleted WI-38 cells

47S

30S+1

+1-01

ASO-SNUL

Ctr-ASO
