# Supplementary material for: Monoallelically expressed noncoding RNAs form nucleolar territories on NOR-containing chromosomes and regulate rRNA expression
Source: eLife journal article supplement (doi:10.7554/elife.80684), 2024-01-19
Supplement: supp [file Figure1-Source Data 1.xlsx]

## Sheet: Sheet1
	# of nucleoli	# of snul1		# of nucleoli	# of snul1		# of nucleoli	# of snul1		# of nucleoli	# of snul1
WI38	2.94444	1	RPE1	4.02	1	HeLa	3.14	1.03	U2OS	6.48	3.38
	2.96	1		3.72	1		3.74	1		6.04	2.44
	3.17	1		3.4	1		2.94	1.04		6.26	2.54
	3.02481	1		3.71333	1		3.27333	1.02333		6.26	2.78667
sd	0.125974	0	sd	0.310054	0		0.416333	0.0208167		0.22	0.516269
se	0.0727313	0	se	0.17901	0		0.24037	0.0120185		0.127017	0.298068
