# Supplementary material for: Monoallelically expressed noncoding RNAs form nucleolar territories on NOR-containing chromosomes and regulate rRNA expression
Source: eLife journal article supplement (doi:10.7554/elife.80684), 2024-01-19
Supplement: supp [file Figure2-Source Data1.xlsx]

## Sheet: Fig2b
SNUL-1+RPA194			P's no threshold	Mander's 1	Mander's 2	SNUL-1+FBL	Date		P's no threshold	Mander's 1	Mander's 2		SNUL-1+RPA194	SNUL-1+FBL
	102620	1	0.26	0.237	0.239		102620	1	0.31	0.305	0.387		0.26	0.31
			0.17	0.196	0.131			2	0.56	0.083	0.212		0.17	0.56
		2	0.24	0.195	0.028			3	0.41	0.502	0.501		0.24	0.41
		3	0.25	0.164	0.31				0.47	0.49	0.571		0.25	0.47
			0.21	0.139	0.304			4	0.64	0.143	0.256		0.21	0.64
		4	0.27	0.216	0.193				0.5	0.071	0.219		0.27	0.5
			0.24	0.163	0.267			5	0.77	0.082	0.156		0.24	0.47
			0.13	0.09	0.277				0.47	0.074	0.23		0.13	0.41
		5	0.2	0.132	0.339			6	0.41	0.444	0.45		0.2	0.5
			0.36	0.079	0.207				0.72	0.079	0.17		0.36	0.42
		6	0.19	0.137	0.19			7	0.5	0.482	0.601		0.19	0.45
			0.16	0.122	0.284			8	0.42	0.446	0.479		0.16	0.46
		7	0.17	0.127	0.178			9	0.45	0.555	0.541		0.17
		8	0.16	0.079	0.17			10	0.46	0.156	0.354		0.16
			0.16	0.183	0.123			ave	0.506429				0.16
		9	0.24	0.239	0.203			median	0.47				0.24
		10	0.18	0.115	0.348			1	0.24	0.153	0.586		0.18
		ave	0.211176					2	0.35	0.314	0.46
		median	0.2					3	0.24	0.247	0.296
	92420	1	0.22	0.097	0.549		90820	1	0.29	0.449	0.187		Mann-Whitney
		2	0.27	0.237	0.414				0.29	0.463	0.2		Column B	SNUL-1+FBL
		3	0.27	0.32	0.269				0.39	0.549	0.246		vs.	vs.
								2	0.37	0.305	0.114		Column A	SNUL-1+RPA194
								3	0.26	0.425	0.164
								5	0.35	0.454	0.276		Mann Whitney test
									0.37	0.487	0.294		P value	<0.0001
								7	0.39	0.5	0.233		Exact or approximate P value?	Exact
									0.3	0.461	0.19		P value summary	****
								6	0.31	0.474	0.324		Significantly different (P < 0.05)?	Yes
									0.34	0.505	0.286		One- or two-tailed P value?	Two-tailed
									0.21	0.43	0.2		Sum of ranks in column A,B	154 , 281
								8	0.36	0.318	0.138		Mann-Whitney U	1
								9	0.27	0.532	0.237
								10	0.45	0.608	0.4
									0.47	0.64	0.325
									0.22	0.475	0.253
								11	0.35	0.528	0.282
									0.4	0.487	0.339
								12	0.62	0.524	0.286
									0.38	0.591	0.321
									0.2	0.362	0.094
								13	0.25	0.373	0.132
									0.28	0.444	0.185

## Sheet: Fig2f
SNUL-1+5ETS-2			P's no threshold	Mander's 1	Mander's 2	5'ETS-1+5'ETS-2			P's no threshold	Mander's 1	Mander's 2			SNUL-1+5'ETS-2	5'ETS1-1+5'ETS-2
	90820	1	0.33	0.413	0.257		90120	1	0.57	0.503	0.455			0.33	0.57
			0.4	0.438	0.426				0.43	0.501	0.329			0.4	0.43
			0.48	0.171	0.136				0.39	0.38	0.19			0.48	0.39
		3	0.24	0.365	0.227				0.51	0.519	0.266			0.24	0.51
		5	0.34	0.409	0.434			2	0.54	0.573	0.3			0.34	0.54
			0.37	0.186	0.065				0.46	0.484	0.271			0.37	0.46
		7	0.39	0.455	0.353				0.64					0.39	0.64
			0.33	0.408	0.337				0.56					0.33	0.56
			0.28	0.357	0.224			4	0.54					0.28	0.54
		6	0.38	0.482	0.562				0.46					0.38	0.46
			0.35	0.495	0.39			7	0.7					0.35	0.7
			0.24	0.383	0.289				0.56					0.24	0.56
		8	0.28	0.389	0.433				0.52					0.28	0.52
		9	0.39	0.599	0.433			5	0.54					0.39	0.54
		10	0.35	0.419	0.475				0.52					0.35	0.52
			0.49	0.602	0.475			6	0.49					0.49	0.49
			0.26	0.443	0.369				0.47					0.26	0.47
		11	0.36	0.553	0.432			ave	0.523529					0.36
			0.35	0.438	0.474			median	0.52					0.35
		12	0.63	0.778	0.719									0.63
			0.43	0.578	0.525									0.43
		13	0.17	0.34	0.121									0.17
			0.23	0.327	0.168									0.23
			0.23	0.368	0.285									0.23
														Column D	5'ETS1-1+5'ETS-2
														vs.	vs.
														Column C	SNUL-1+5'ETS-2
														Mann Whitney test
														P value	<0.0001
														Exact or approximate P value?	Exact
														P value summary	****
														Significantly different (P < 0.05)?	Yes
														One- or two-tailed P value?	Two-tailed
														Sum of ranks in column C,D	329 , 532
														Mann-Whitney U	29

## Sheet: Fig2g
FC/DFC units that associated with SNUL-1
6
5
5
4
3
4
6
3
3
5
4
5
5
4
6
5
5
3
4
4
3
4
4
