# Supplementary material for: Monoallelically expressed noncoding RNAs form nucleolar territories on NOR-containing chromosomes and regulate rRNA expression
Source: eLife journal article supplement (doi:10.7554/elife.80684), 2024-01-19
Supplement: supp [file Figure3-figure supplement 1-Source Data1.xlsx]

## Sheet: Fig S3f
SNUL-2 associate w / Chr.13			Associating	Not associating	Total	association rate	average	sd
		B1	179	12	197	90.9	90.6	1.47309
		B2	114	8	124	91.9
		B3	89	10	100	89
