# Supplementary material for: Monoallelically expressed noncoding RNAs form nucleolar territories on NOR-containing chromosomes and regulate rRNA expression
Source: eLife journal article supplement (doi:10.7554/elife.80684), 2024-01-19
Supplement: supp [file Figure3-figure supplement 1-Source Data2.xlsx]

## Sheet: Fig S3h
	cell	mean	min	max	IntDen	RawIntDen		ratio
multi-threshold	1	672	7.455	4	27	5010	5010	1.19116
		930	7.587	4	36	4206	4206
	2	323	12.858	7	47	25917	25917	11.5443
		120	29.183	20	56	2245	2245
	3	323	12.858	7	47	4153	4153	1.85154
		304	7.378	4	25	2243	2243
	4	756	12.353	6	55	9339	9339	4.57794
		104	19.615	9	43	2040	2040
	5	391	22.286	15	45	8714	8714	1.16732
		440	23.118	16	49	10172	10172
	6	94	42	6	85	3948	3948	1.57794
		37	67.622	23	85	2502	2502
	7	210	20.057	7	60	4212	4212	1.42297
		169	17.515	7	49	2960	2960
	8	320	14.2	7	63	4544	4544	1.32768
		621	9.715	5	49	6033	6033
	9	64	9.375	6	18	600	600
		361	14.283	7	48	5156	5156	8.59333
	10	168	11.351	6	31	1907	1907	2.12271
		667	6.069	3	28	4048	4048
	11	104	12.837	6	28	1335	1335	4.97903
		504	13.188	4	78	6647	6647
	12	53	59.038	26	85	3129	3129	1.33433
		38	61.711	20	85	2345	2345
	13	53	54.094	22	85	2867	2867	2.17362
		29	45.483	21	78	1319	1319
	14	224	13.92	5	46	3118	3118	5.61802
		72	7.708	4	17	555	555
	15	55	39.873	19	69	2193	2193	1.82598
		28	42.893	11	76	1201	1201
