# Supplementary material for: Monoallelically expressed noncoding RNAs form nucleolar territories on NOR-containing chromosomes and regulate rRNA expression
Source: eLife journal article supplement (doi:10.7554/elife.80684), 2024-01-19
Supplement: supp [file Figure3-Source Data1.xlsx]

## Sheet: Fig3C
SNUL-1	asssociate w/.		Associating	not associating	Total	associating rate	average	sd
	chr13	B1	29	67	85	34.1	28.8	7.49533
		B2	12	30	51	23.5
	chr22	B1	35	55	79	44.3	45.75	2.05061
		B2	25	37	53	47.2
	chr15	B1	30	0	30	100	100	0
		B2	30	0	30	100
