# Supplementary material for: Monoallelically expressed noncoding RNAs form nucleolar territories on NOR-containing chromosomes and regulate rRNA expression
Source: eLife. 2024 Jan 19;13:e80684. doi: 10.7554/eLife.80684 (PMC10852677; doi:10.7554/eLife.80684)
Supplement: Supplementary file 1. — Please see the Excel file [file elife-80684-supp1.xlsx]

## Sheet: sequence of SNUL-1 probe
Supplementary file1. Sequence of SNUL-1 probe
TATGGCTCCT TCCTCCCTCT CTCCATTCTT CTCTCAGCTT TCCTGTGGGC 50 AGGGGTAGGC ACAGCCAGGC TTGGGAGCAT CGCCATGCCC TGCCACCTGG 100 GTCCCAGCCT GCTCCTCGTT ATAGTCTTCC CAGTTTGGGG AAGAGCAGTG 150 ATATGCCAAG AATGGAGGCC TCAGACTCTC CCAATCCCTG ATTTTTACAT 200 GTCCCCCTAT AAGGCCCCTC TGCCATCTAC ACTTTTGCCC TTCATCCACA 250 AAGCCCAAAA GGAAGGCATT ATAGCTAGCC ATGCCCTCTG ACTGCCCTCT 300 GCCCCTTTAA GGGAAATGGA AATGGGTACC CAGCTGACTG AA…
