# Supplementary material for: Monoallelically expressed noncoding RNAs form nucleolar territories on NOR-containing chromosomes and regulate rRNA expression
Source: eLife. 2024 Jan 19;13:e80684. doi: 10.7554/eLife.80684 (PMC10852677; doi:10.7554/eLife.80684)
Supplement: Supplementary file 3. — For each isoform the empirical p-value is the empirical probability of observing a dissimilarity score greater than or equal to its dissimilarity score. The product of the 5 p-values being in the order of 10-10 rejects the hypothesis of all isoforms being the transcripts of the same known gene. [file elife-80684-supp3.xlsx]

## Sheet: Sheet1
Supplementary file 3. The dissimilarity score between each isoform and its best match from human transcript database. For each isoform the empirical p-value is the empirical probability of observing a dissimilarity score greater than or equal to its dissimilarity score. The product of the 5 p-values being in the order of 10^(-10) rejects the hypothesis of all isoforms being the transcripts of the…
isoform name	dissimilarity score (%)	empirical
		p-value
nucDNA1_PK_combo__HQ_transcript/1269	5.5	0.02
nucDNA1_PK_combo__HQ_transcript/2305	4.2	0.02
nucDNA1_PK_combo__HQ_transcript/2615	1.2	0.05
nucDNA1_PK_combo__HQ_transcript/9572	3.3	0.03
nucDNA1_PK_combo__HQ_transcript/8644	4.3	0.02
