# Supplementary material for: Monoallelically expressed noncoding RNAs form nucleolar territories on NOR-containing chromosomes and regulate rRNA expression
Source: eLife. 2024 Jan 19;13:e80684. doi: 10.7554/eLife.80684 (PMC10852677; doi:10.7554/eLife.80684)
Supplement: Supplementary file 4. — The pairwise dissimilarity for the isoforms. Global pairwise alignment was used to compute the dissimilarity score for each pair of isoforms. The dissimilarity score was computed by taking the ratio of mismatching to matching sites where both isoforms do not contain gaps. For each pair of isoforms, the p-value shows the probability of observing a dissimilarity score greater than or equal to their dissimilarity by approximating the empirical distribution of pairwise dissimilarity with erlang distribution. [file elife-80684-supp4.xlsx]

## Sheet: Sheet1
Supplementary file 4. The pairwise dissimilarity for the isoforms.Global pairwise alignment was used to compute the dissimilarity score for each pair of isoforms. The dissimilarity score was computed by taking the ratio of mismatching to matching sites where both isoforms do not contain gaps. For each pair of isoforms, the p-value shows the probability of observing a dissimilarity score greater t…
Isoform 1	Isoform 2	pairwise dissimilarity (%)	p-value
transcript/2615	transcript/1269	4.8	0.0007
transcript/2615	transcript/2305	4.8	0.0007
transcript/2615	transcript/9572	6.4	4e-05
transcript/2615	transcript/8644	6.6	3e-05
transcript/1269	transcript/2305	4	0.003
transcript/1269	transcript/9572	5.2	0.0003
transcript/1269	transcript/8644	4.2	0.002
transcript/2305	transcript/9572	5	0.0005
transcript/2305	transcript/8644	5.1	0.0004
transcript/9572	transcript/8644	4.3	0.002
