# Supplementary material for: Monoallelically expressed noncoding RNAs form nucleolar territories on NOR-containing chromosomes and regulate rRNA expression
Source: eLife. 2024 Jan 19;13:e80684. doi: 10.7554/eLife.80684 (PMC10852677; doi:10.7554/eLife.80684)
Supplement: Supplementary file 5. — Please see the Excel file. [file elife-80684-supp5.xlsx]

## Sheet: Primers for FISH probe cloning
primer name	sequence
SNUL-1 Probe1-F	TATGGCTCCTTCCTCCCTCT
SNUL-1 Probe1-R	AGGTGAAAACGTGCTATTGGAG
SNUL-1 Probe2-F	GCTGACTGAACCTACTCAACACC
SNUL-1 Probe2-R	CTCAGCTGTGCTTTGAGCTG
SNUL-1 Probe3-R	GAAGACATGGGGCAGGGTAT
5'ETS-F2	CTGACACGCTGTCCTCTGG
5'ETS-R325	GAGACGAGAACGCCTGACAC
5'ETS-F956	GTTTGAGTGAGACGAGACGAGA
5'ETS-R3577	GCAAGCGAGGAGGACGAC
ITS1-F5645	GTTCGCTCGCTCGTTCGTTC
ITS1-R6336	GACGGCCGCCGGGTAAAG
m5‘ETS-F2433	GTCTCTCGGTCCCTTGTGAG
m5'ETS-R3578	ACCGGTAGCACCATTCACTC

## Sheet: smFISH probe
5'ETS-1 (1-414)		5'ETS-2 (498-977)		5'ETS -3(980-1641)			SPA2					SNRPN-exon
1	AGAGGACAGCGTGTCAGC	1	GCGGAGCGAGAAGGACGGTC	1	ttccccgcgtgggaggggcg		1	ttattcagtactccaagtcc	20	0.4		1	agacagatgcgtcaggcatc	83	0.55
2	AACCTCTCCGACGACAGG	2	GAGAGGAGAGACGAGGGGAC	2	tcaccgagagcaggcgggcg		2	aaaggactttagggcccaaa	46	0.45		2	gtagttcgtctcaggtgtaa	144	0.45
3	CCGCGCGCATCCGGAGGC	3	TGTCTGCCGCGTCAGAGGAC	3	agaggggagcacgggacgtg		3	acaacagcaagcctctgaac	90	0.5		3	ctgcgtttgacttggacttc	186	0.5
4	GTCACCGGTAGGCCAGAG	4	CAAGTCGACAACCACTGGAG	4	caccgcgatcgctcacacgg		4	cctaaaatccctatgcactg	330	0.45		4	ggtacaactgacactcttgg	227	0.5
5	GGAGCGCGGCCGGCTAGC	5	CGAGAGGGCAGCACGACGGG	5	acgcgtcacaccggcccgaa		5	atcactccaatatacctacc	354	0.4		5	aaatccaccacaggtacttg	267	0.45
6	CCCGGCAGGCGGCTCAAG	6	GAGCCGACGCTCGCGCAAAC	6	ggtcggaggcagaacggcag		6	ataccgatcacttcacgtac	389	0.45		6	cttggtgtctcagctaagaa	309	0.45
7	GAGAGAACAGCAGGCCCG	7	TCGGGCACCTGAGGGACAAC	7	cgaagtcaacccacacacga		7	gtggtcactattatacacct	431	0.4		7	ctccaatatggctttaacca	332	0.4
8	AGTCGGGACGCTCGGACG	8	GAACGACACACCACCGTTCG	8	tccttccttccgaggcagag		8	cctctacacagcaatcattc	788	0.45		8	ttgcttggaatcagattcct	357	0.4
9	GGACCCGGGCCGGCACCG	9	TCGAACCCCACACCGACGAG	9	ggtgcgcgcgtgcgcgcaac		9	attaaaggctgcggactgtg	832	0.5		9	aaagagtagatggagcctgg	380	0.5
10	CCCGGGTGGGTCAGAGAC	10	TCGTCTCGTCTCACTCAAAC	10	ctcgagcgttcgcgttcagg		10	taggcaaaccagatgaccat	868	0.45		10	gaaacaatgcaagctgggca	408	0.5
11	TCGCCCCCTTCCCCGCCG	11	AGAGGGGAGCACGGGACGTG	11	ggtacgaggaaacacctgcg		11	aaagggtacgcaaggattcc	958	0.5		11	aaaggtatgacgcaggttct	432	0.45
12	CGCACGGGGGCACGGTGG	12	GGTCGGAGGCAGAACGGCAG	12	tggggaagggagggggccct		12	cttatgccatagcctctaaa	990	0.4		12	cttctgaagacctaggggaa	462	0.5
13	CGGGCGCCCGCAGCGGAG	13	CGAAGTCAACCCACACACGA	13	cgcagaggcgccgagggacg		13	gttatttcgacatagccttc	1124	0.4		13	accaaatccaatgtccacag	495	0.45
14	CGGGGTGGGGTTGTCGCG	14	TCCTTCCTTCCGAGGCAGAG	14	cgccagccgctcctcctcgg		14	aatggcagtgacgcaacaca	1153	0.5		14	tcttgccaacagtcatgatt	523	0.4
15	ACACGCACGGCACGGAGC	15	CTCGAGCGTTCGCGTTCAGG	15	ttttctcaccgagggtgggt		15	tccgaaacagcagaagctga	1294	0.5		15	tatagtcaatgtgctgcagc	553	0.45
16	CGCGGAGACGAGAACCCC	16	CTGCGGTACGAGGAAACACC	16	ctctcagatcgctagagaag		16	aaccggaaaggaacagctgc	1546	0.55		16	gccttaaaggtgccaatgaa	605	0.45
17	GAAGGGGCGGCGGACAAC	17	CGAGGGACGCCTGGGGAAGG	17	atccggtacccccaaggcac		17	tctagtttactgcagagctg	1746	0.45		17	tctttggcttgatctttctg	670	0.4
18	GGCCAACCCCCCACTCCG	18	TAGAGAAGGCTTTTCTCACC	18	aggcagagacagaggcggcg		18	cattaatggaggcttgctga	1824	0.45		18	ttttcttcacgctctggttg	698	0.45
19	CCAGCGAGCCGATCGGCT	19	CAAGGCACGCCTCTCAGATC	19	tacggcagcgctaccataac		19	gattttccagggagtcagaa	1864	0.45		19	agcaacaccagacccaaaac	722	0.5
20	AGCGGAGGCCGGCCGGCC	20	AGGCAGAGACAGAGGCGGCG	20	gaggagggtcctctgcgagc		20	gggttaacaagtccagtttg	1943	0.45		20	gtcatggataccaagttctc	749	0.45
		21	TACGGCAGCGCTACCATAAC	21	caaccccgtcgagggggaag		21	atgcagtgcatcagaatgga	2059	0.45		21	gagcaatgccagtatctttg	787	0.45
		22	TCGAGGGGGAAGCGGAGGAG	22	cggcggaaccctcgcttctc		22	tccagtgtttgaaacacctt	2139	0.4		22	tgtggagtcattacctgctg	941	0.5
		23	CAGTAGGCGACGAGCCGCAC	23	actcggccaccaccgcggtg		23	ttcattaacctttctcacca	2329	0.35		23	caggtggaggagccataatg	1087	0.55
		24	CGACTCGGAAGGGGGAGGCG	24	ggccacagtaggcgacgagc		24	gcaagcactgaaaatcctgc	2417	0.5		24	agtatgctaaggtcttggtg	1236	0.45
		25	GTCACGACTCGGCACGGGAG	25	cgactcggaagggggaggcg		25	acaactcagtgcaaccagac	2477	0.5		25	agacgcattgcaggggaaaa	1276	0.5
							26	cgggcttcgtagatttaact	2509	0.45		26	gctcacaaacactctacaca	1304	0.45
							27	tactcagcttgcaaatagcc	2685	0.45		27	acctcacagtttaattgctc	1372	0.4
							28	ttcaagaggcctttccaaag	2768	0.45		28	cctcatccacagtaacttaa	1434	0.4
							29	tgagtaggacacagaccttg	2792	0.5		29	tcaactgcttaataggcatc	1456	0.4
							30	aaaaagccctagcacagagc	2820	0.5		30	gcagaaaacctttttatcct	1502	0.35
							31	atccaaatcagttagtaccc	2921	0.4
							32	tttcggcaatgacacactgg	2986	0.5
							33	ttgagggcagtactcacaac	3187	0.5
							34	gctagcatccagaaatggag	3335	0.5
							35	aaacctcattgcctccaaaa	3537	0.4
							36	tgttaaatgtttgccctcag	4026	0.4
							37	gtctgaggtcaactgaggaa	4392	0.5
							38	attcggcagttgctcaatat	4417	0.4
							39	agaacctggcatatacgagg	4764	0.5
							40	ctaccactactctcatactt	4803	0.4
							41	ctttctattatacctgcagc	4831	0.4
							42	ctctgaaccctagatgtttt	6185	0.4
							43	cagcaggacctttcactaaa	6267	0.45
							44	actgcagaaaccacctatga	6315	0.45
							45	caccagactagccatattag	6337	0.45
							46	gctgctcaagggaacagaac	6368	0.55
							47	atagaagagctgctcaagct	6467	0.45
							48	gtgctttctttaggatttgc

## Sheet: oligos
name	sequence
SNUL-2 probe	ATTATTTCTTGAGCACGCCCTTCCTCCCCC TCTCTCTGTC TCTCTGTCTG TCTCTGTCTC TGTCTCTCT /36-FAM/
[CT]20	CTCTCTCTCTCTCTCTCTCTGTCTCTCTCTCTCTCTCTCT /36-FAM/
SNUL-1 Probe 4 [CT]	/5TEX615/CAAATAACCC CCCCATCATA CCCTGCCCCA TGTCTTCCTC TACTCTCTCC CTCATGCTTT CTCTCTCTCT CTCTCTCTCT GTCTCTCTCT CTCTCTCTCT

## Sheet: antisense oligos
ASO	Target	Inonis#
ASO-SNUL	SNULs	828901
Ctr-ASO	Scr	559631

## Sheet: BAC
target	BAC clone
SNRPN	RP11-186C7
DJ	CH507-535F5

## Sheet: commercial DNA probes
name	catalog nunmber
15CEN	Abbott Molecular, 06J36-025
15 SatIII	Abbott Molecular, 06J37-025,
Chr.13 paint	MetaSystems, 17193-D
Chr.15 paint	MetaSystems, 18472-A
Chr.22 paint	MetaSystems, 17384
