# Supplementary figures and images for: Monoallelically expressed noncoding RNAs form nucleolar territories on NOR-containing chromosomes and regulate rRNA expression
Source: eLife journal article supplement (doi:10.7554/elife.80684), 2024-01-19

Figure 1-figure supplement 1

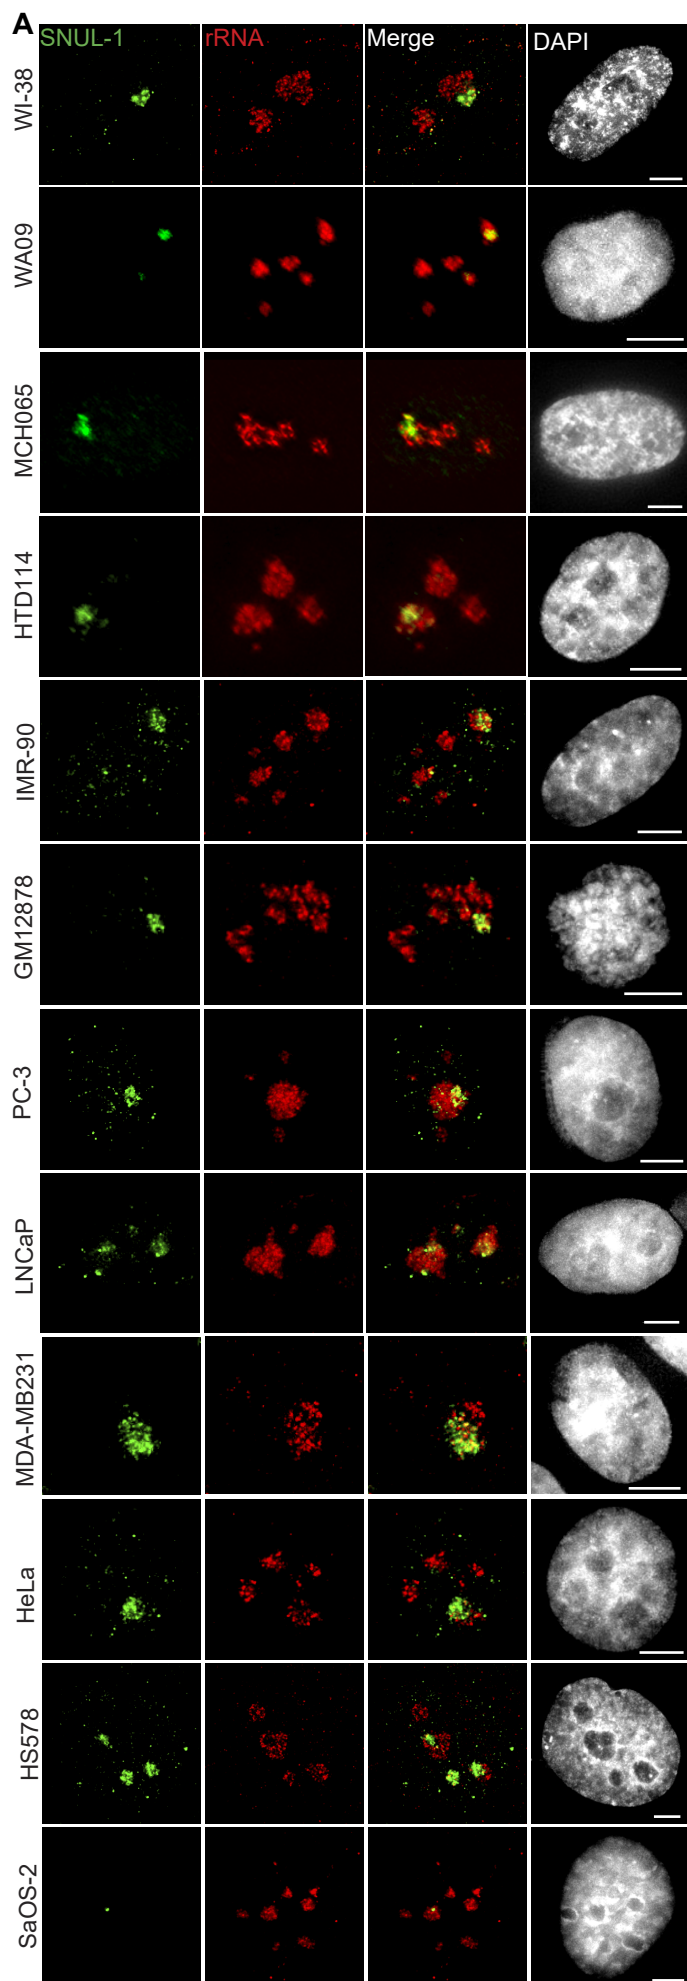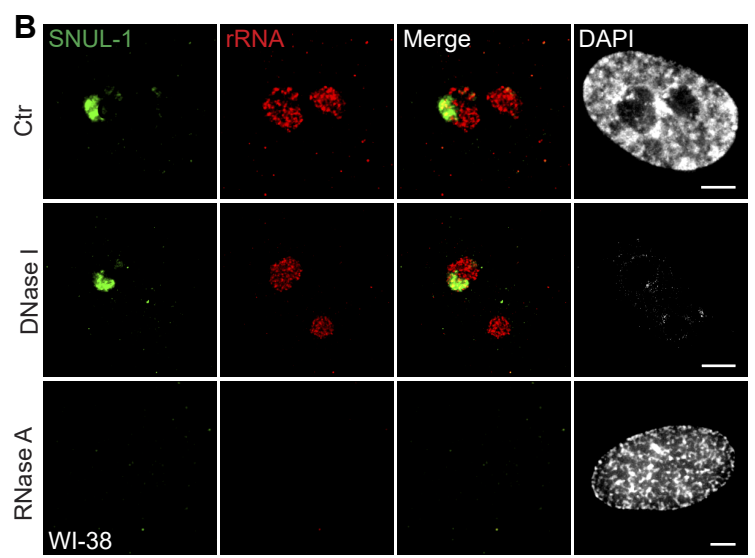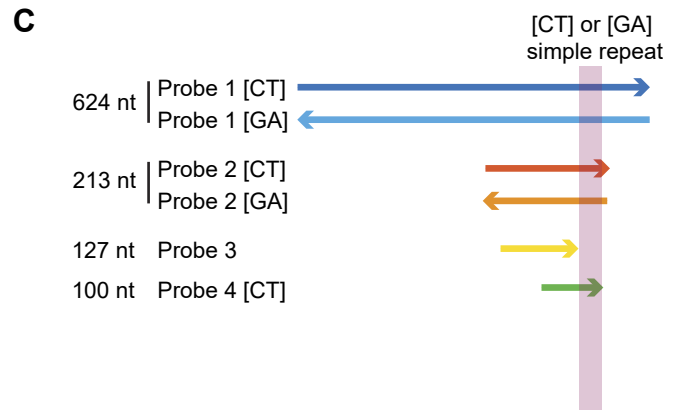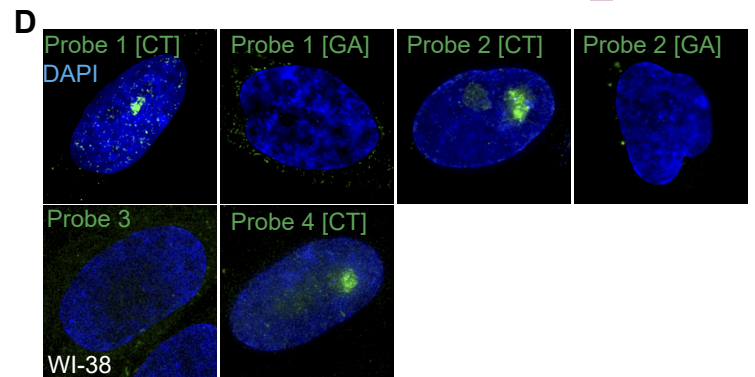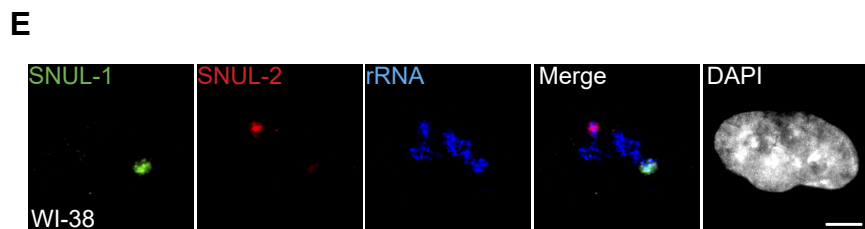

Supplement: supp [file elife_poa_e80684_Figure_1_figure_supplement_1.pdf › elife_poa_e80684_Figure_1_figure_supplement_1.pdf]

**A**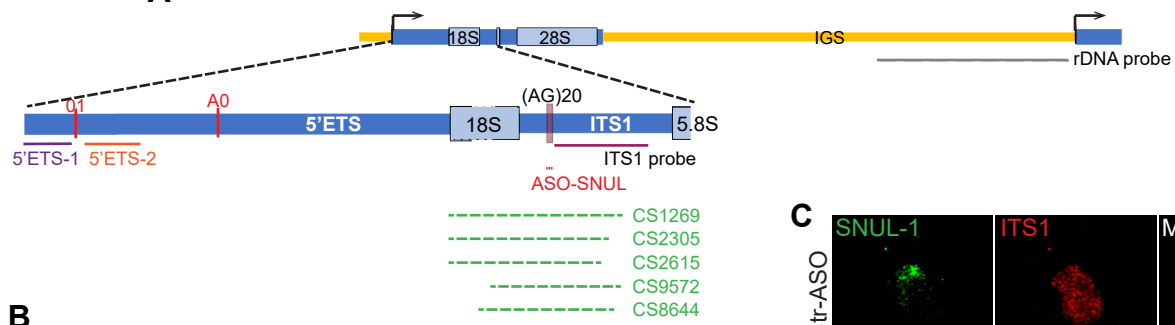**B**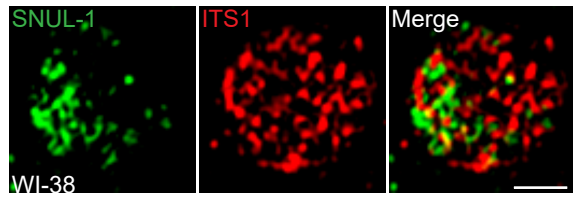**C**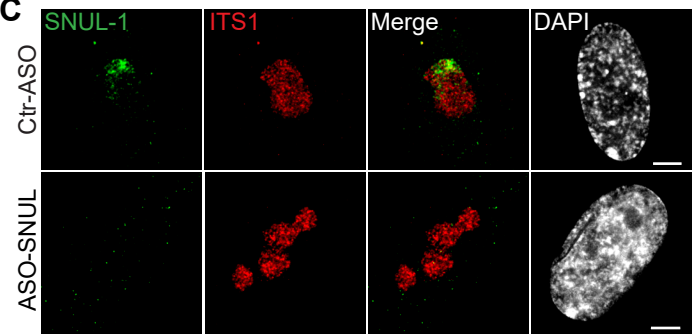

Supplement: supp [file elife_poa_e80684_Figure_1_figure_supplement_3.pdf › elife_poa_e80684_Figure_1_figure_supplement_3.pdf]

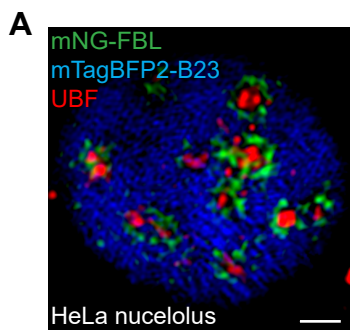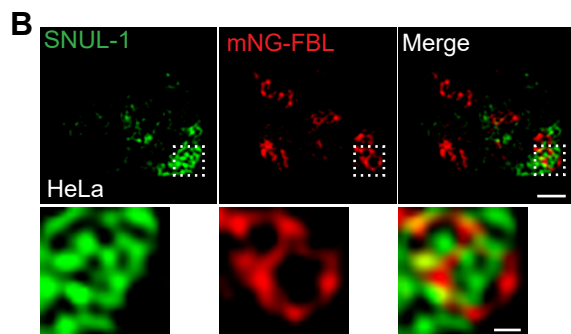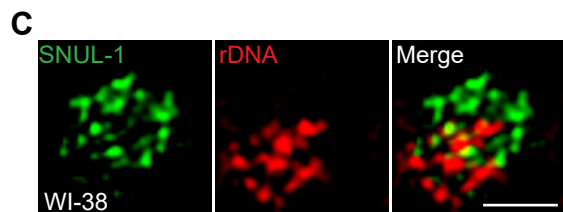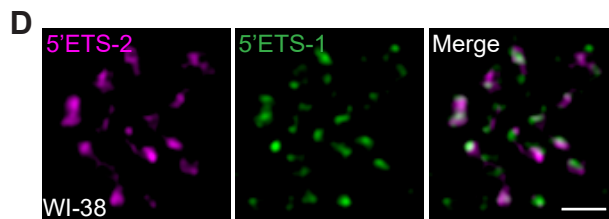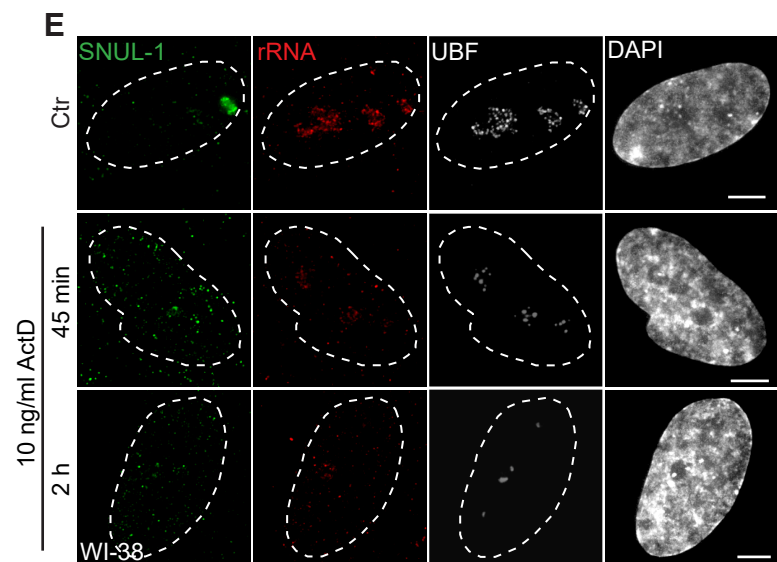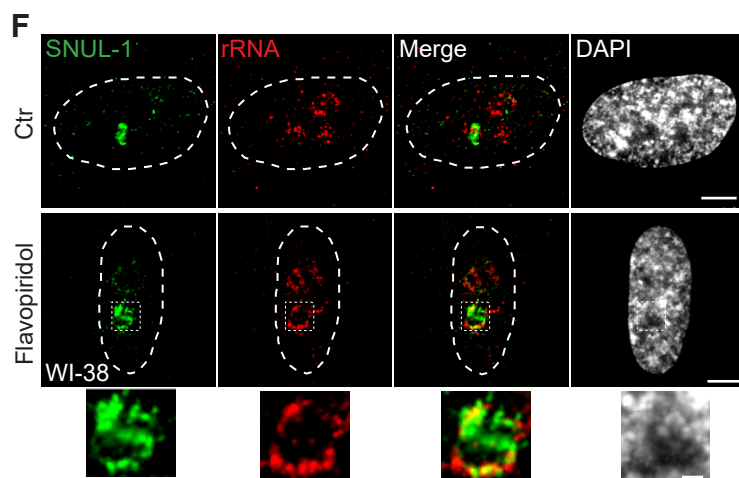

Supplement: supp [file elife_poa_e80684_Figure_2_figure_supplement_1.pdf › elife_poa_e80684_Figure_2_figure_supplement_1.pdf]

Figure 3-figure supplement 1

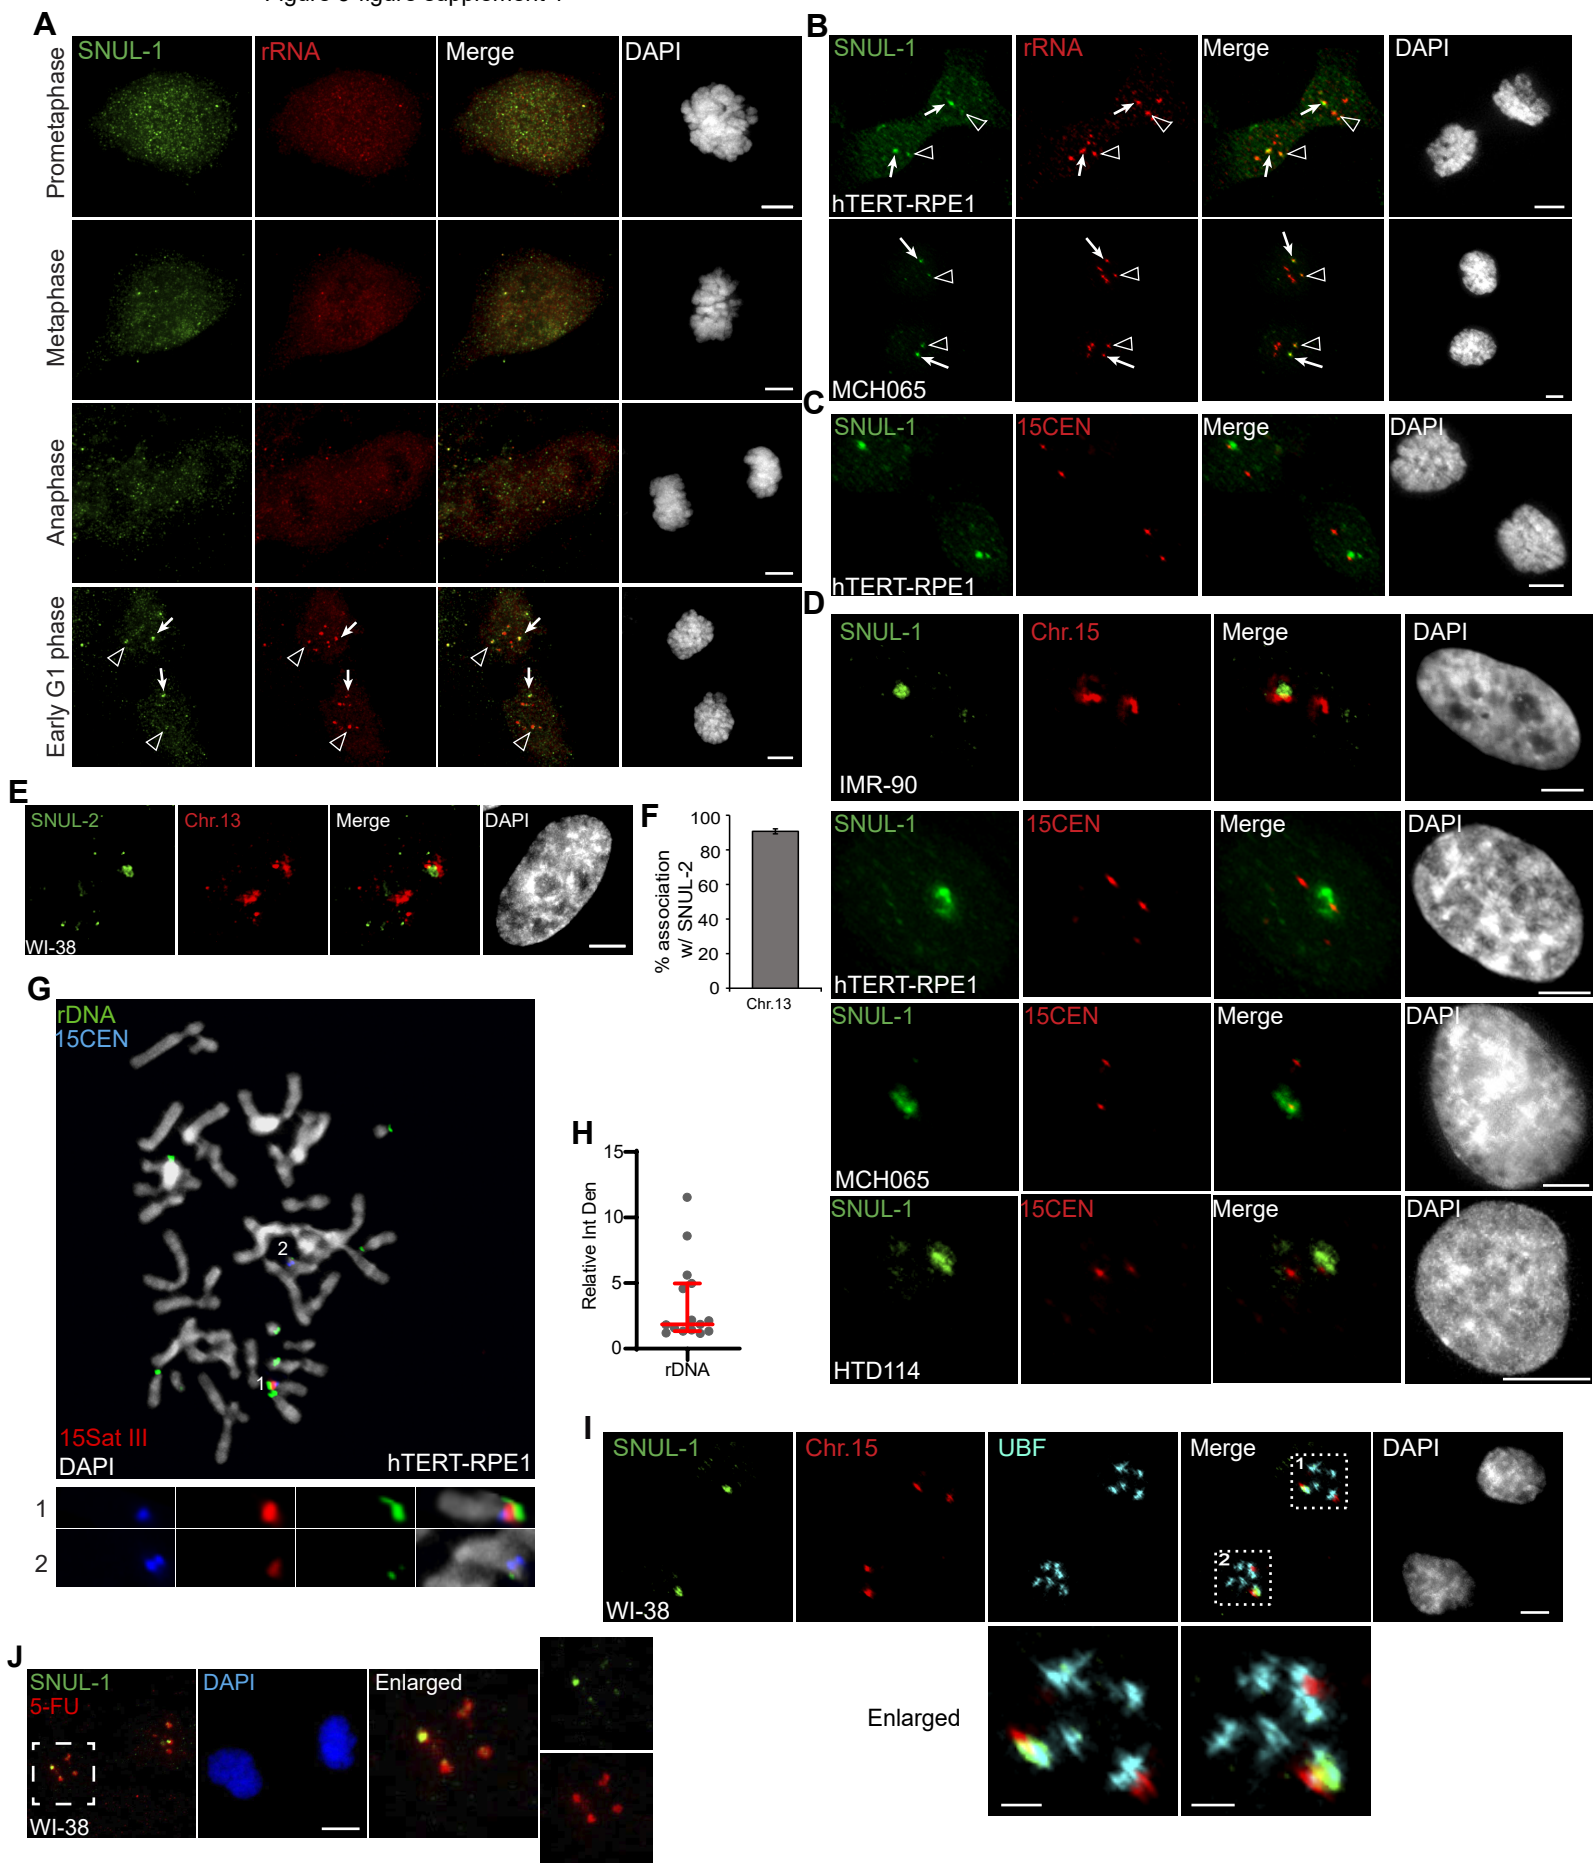

Supplement: supp [file elife_poa_e80684_Figure_3_figure_supplement_1.pdf › elife_poa_e80684_Figure_3_figure_supplement_1.pdf]

Figure 4-figure supplement 1

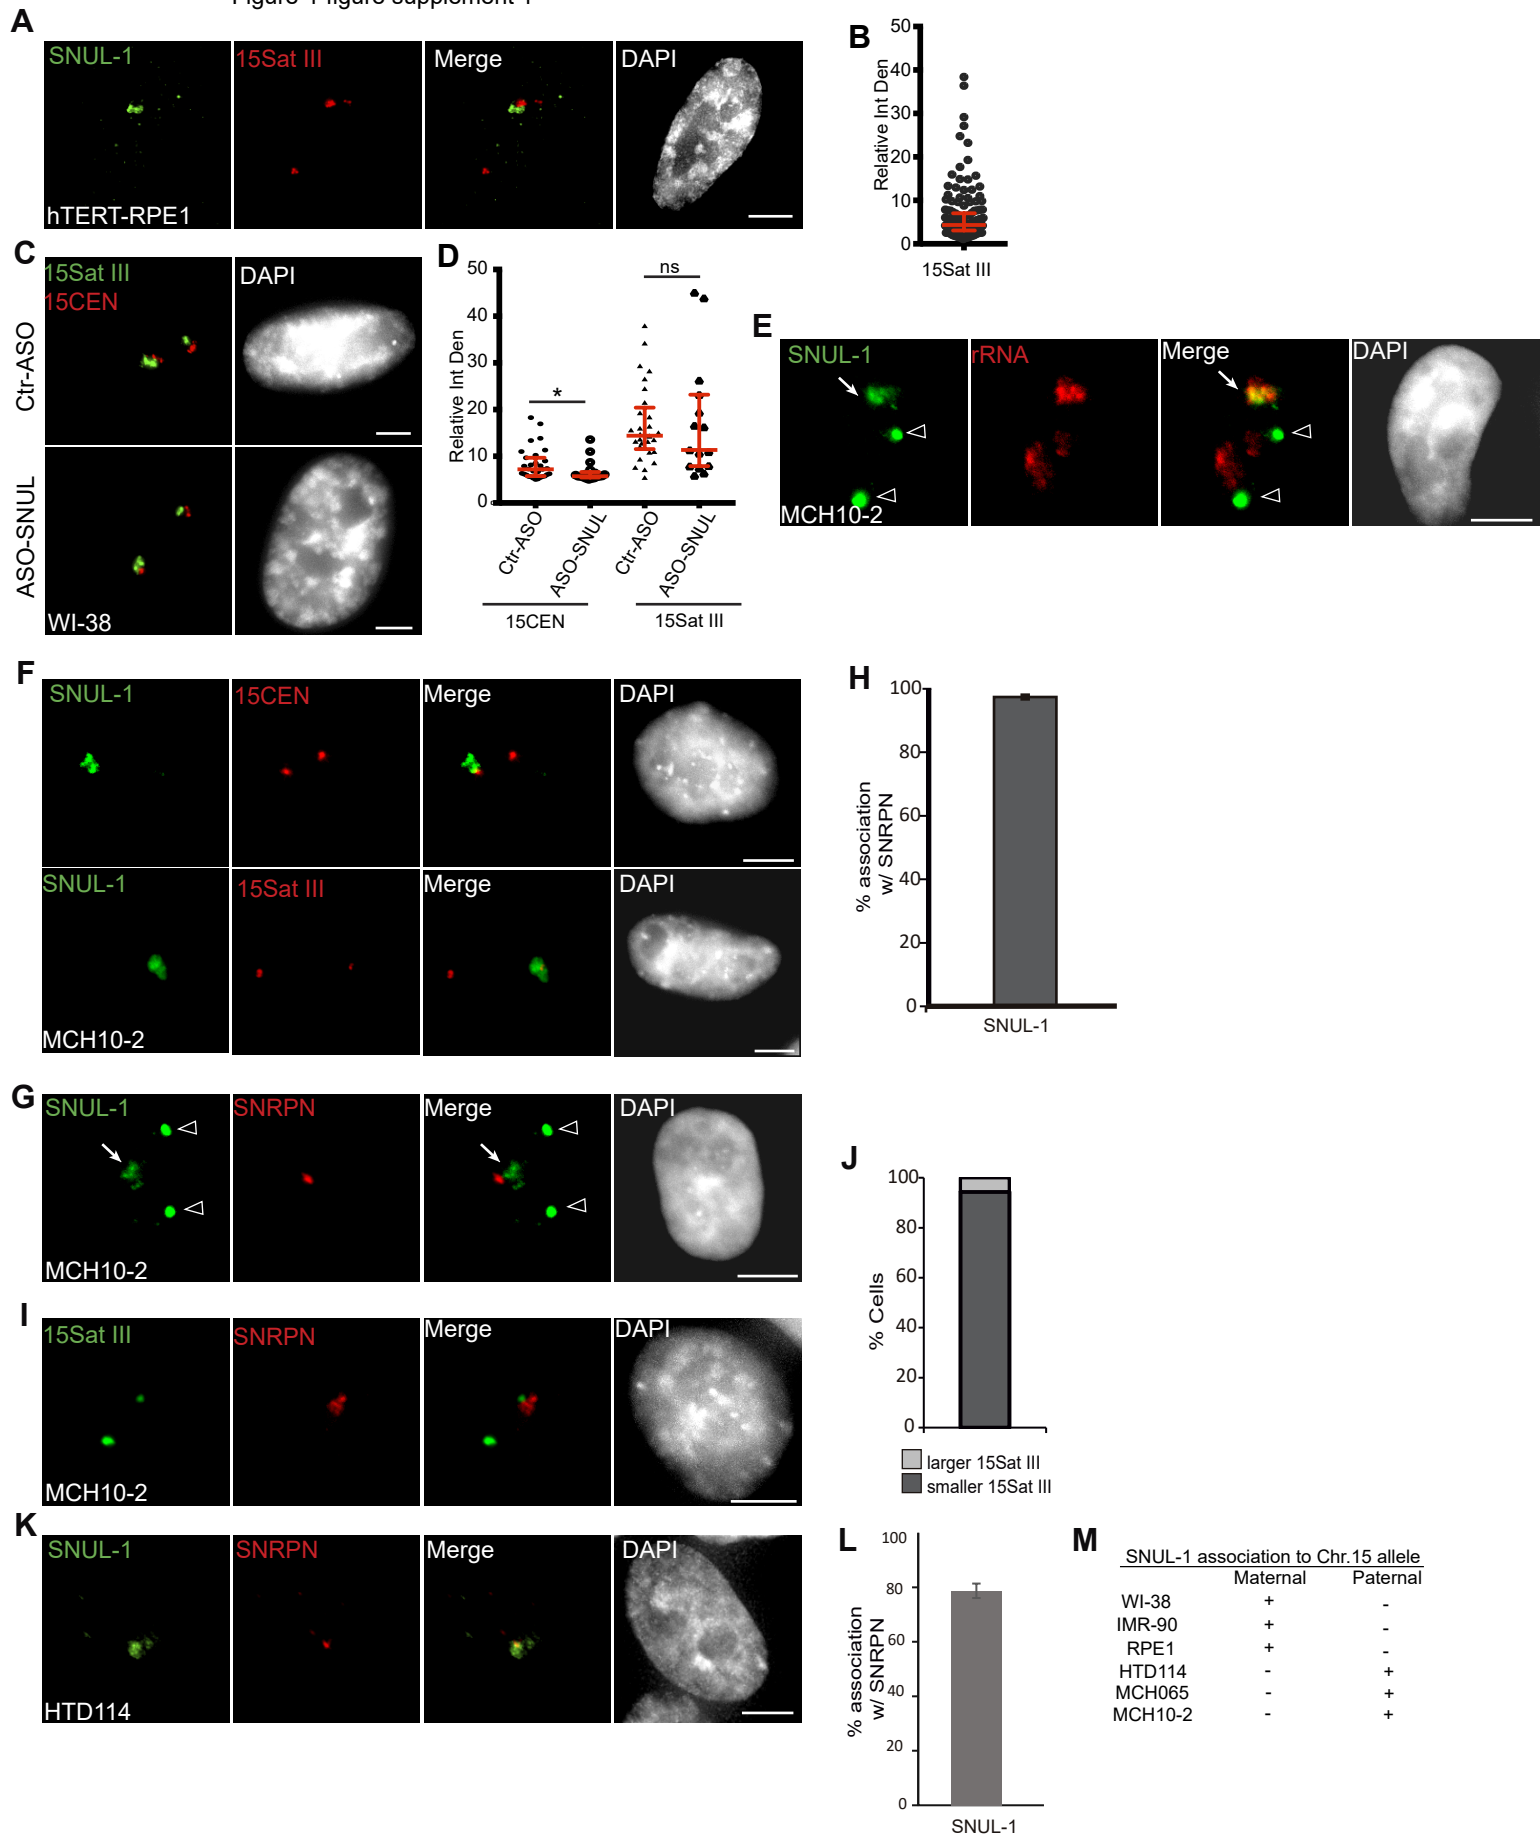

Supplement: supp [file elife_poa_e80684_Figure_4_figure_supplement_1.pdf › elife_poa_e80684_Figure_4_figure_supplement_1.pdf]

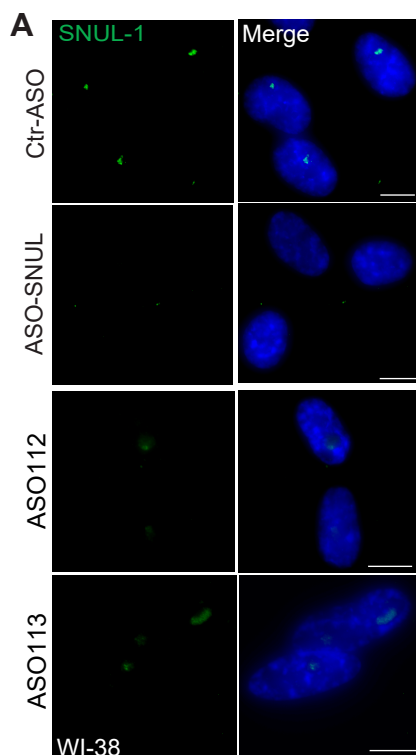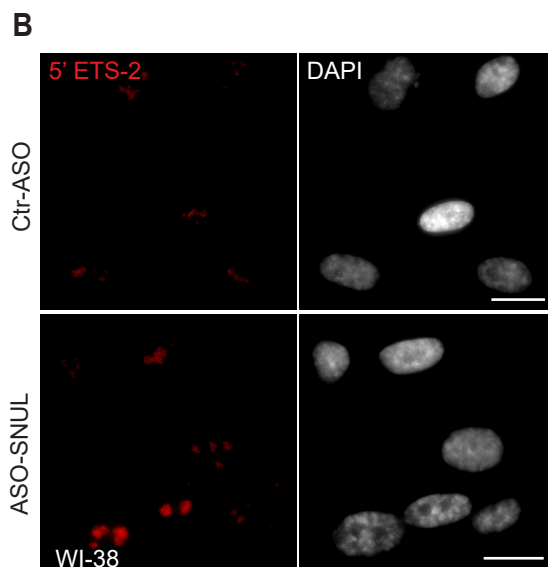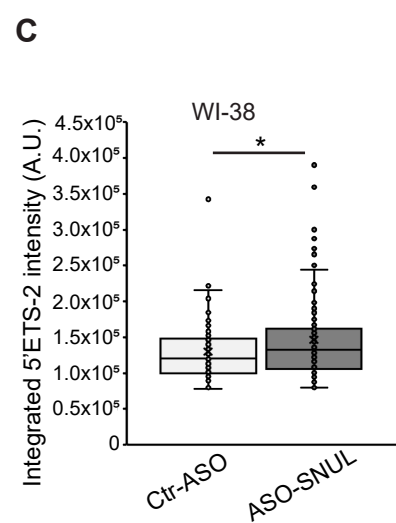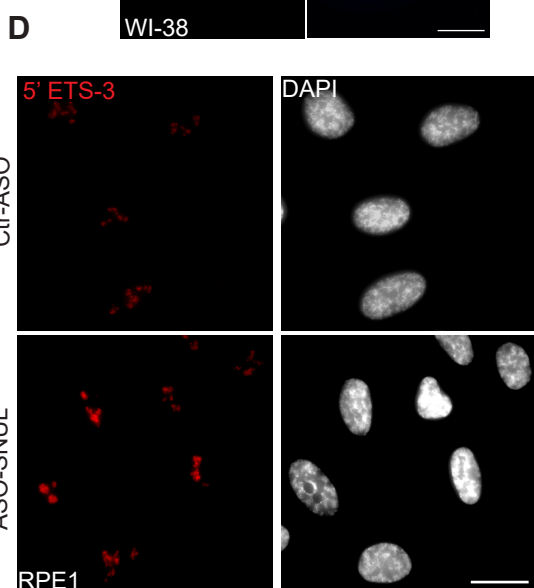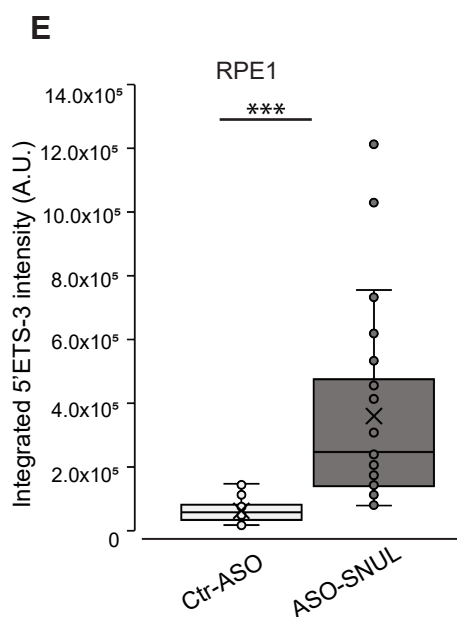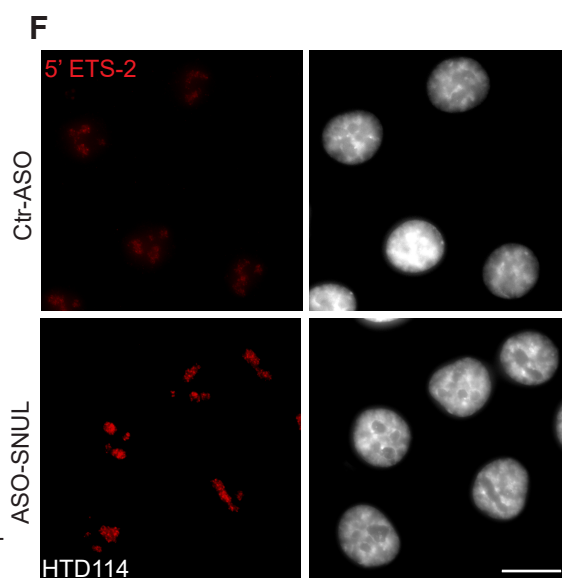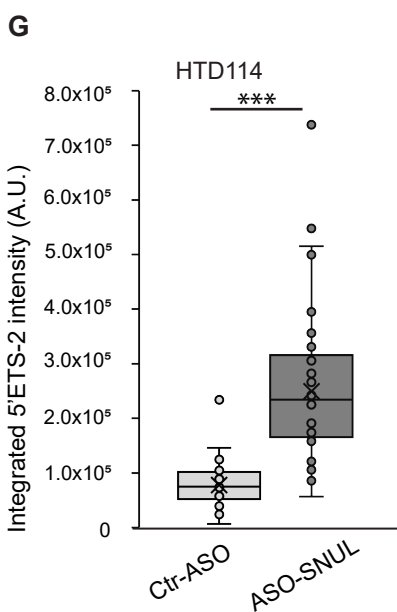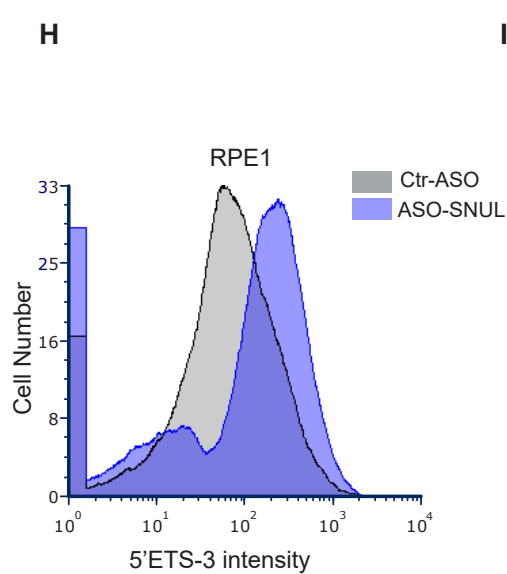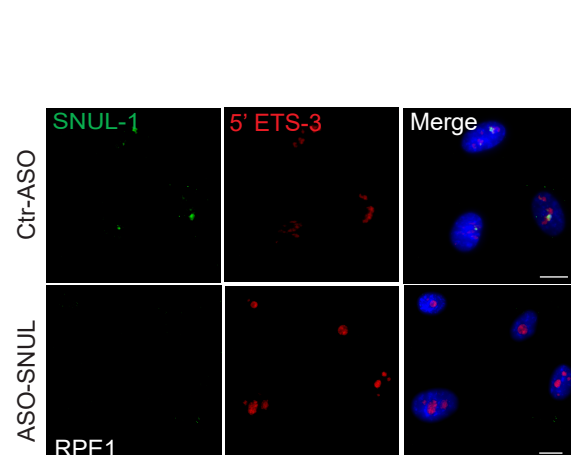

Supplement: supp [file elife_poa_e80684_Figure_5_figure_supplement_1.pdf › elife_poa_e80684_Figure_5_figure_supplement_1.pdf]

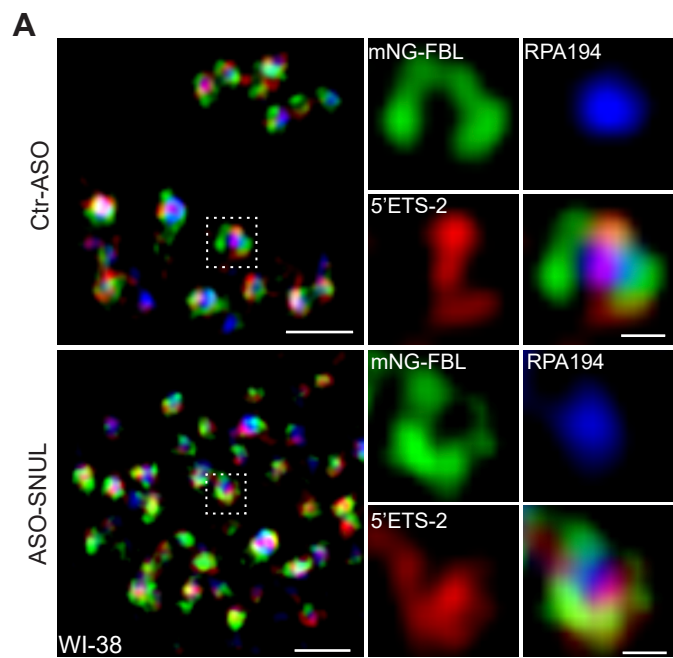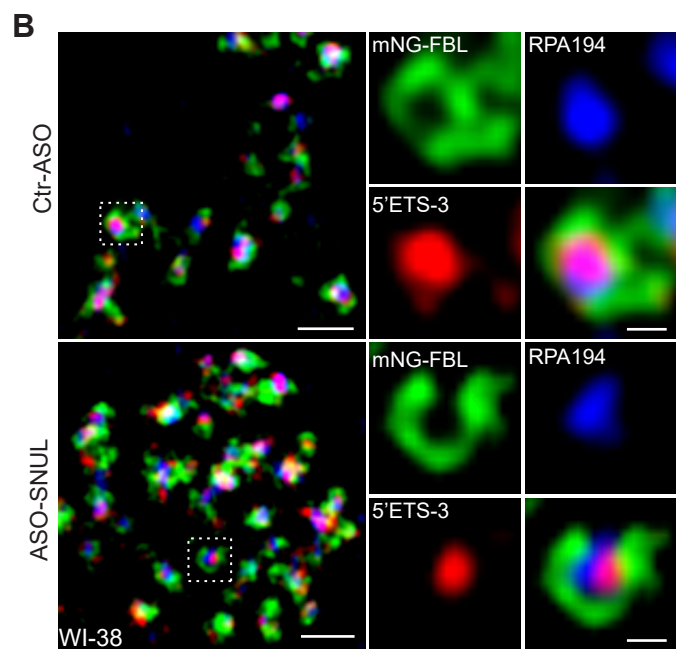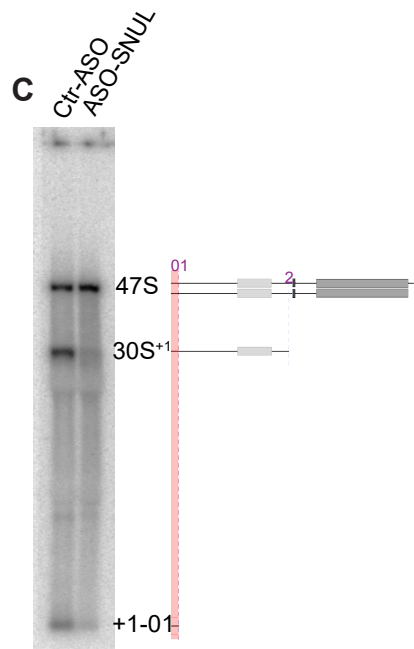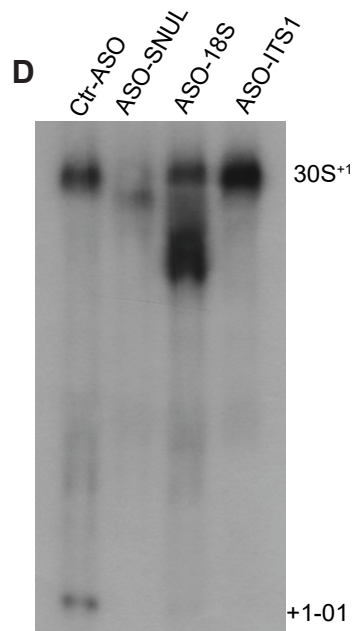

Supplement: supp [file elife_poa_e80684_Figure_5_figure_supplement_2.pdf › elife_poa_e80684_Figure_5_figure_supplement_2.pdf]

**A**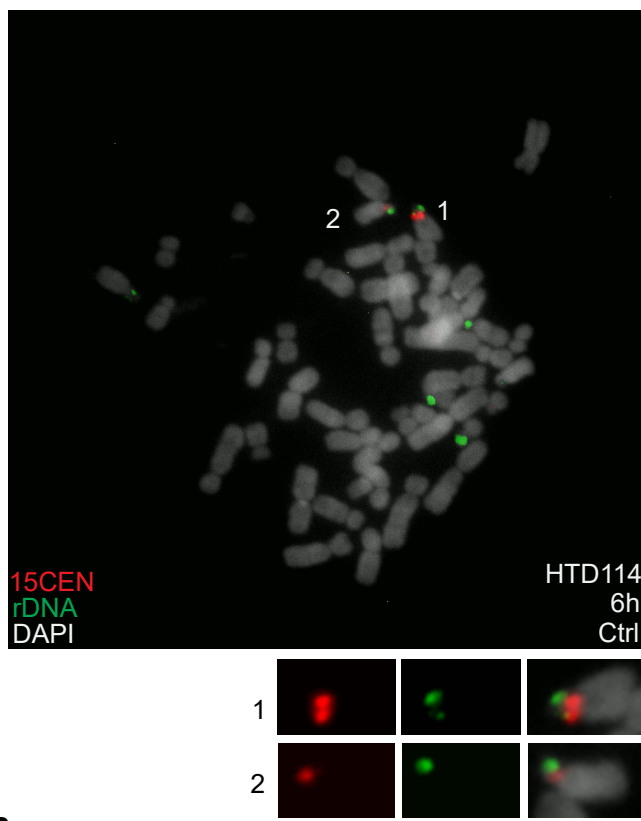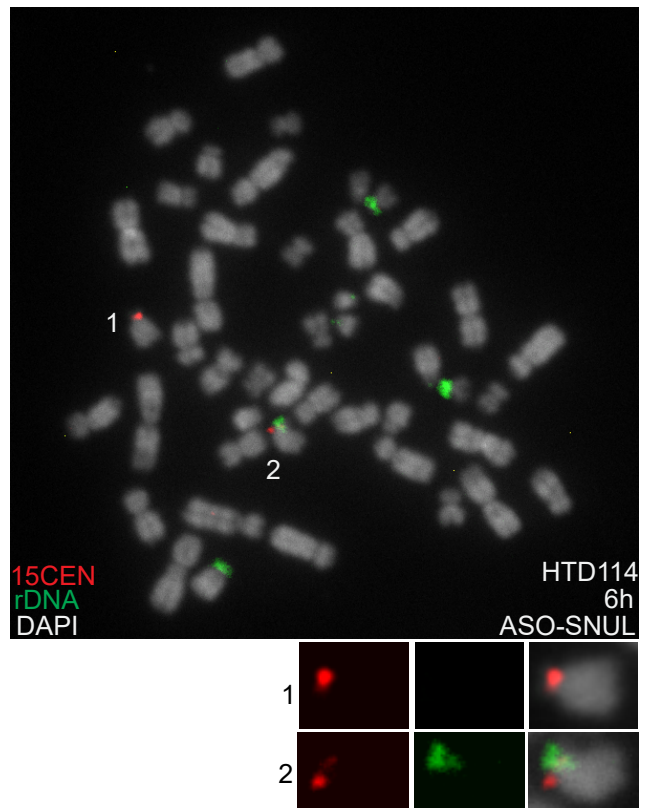**B**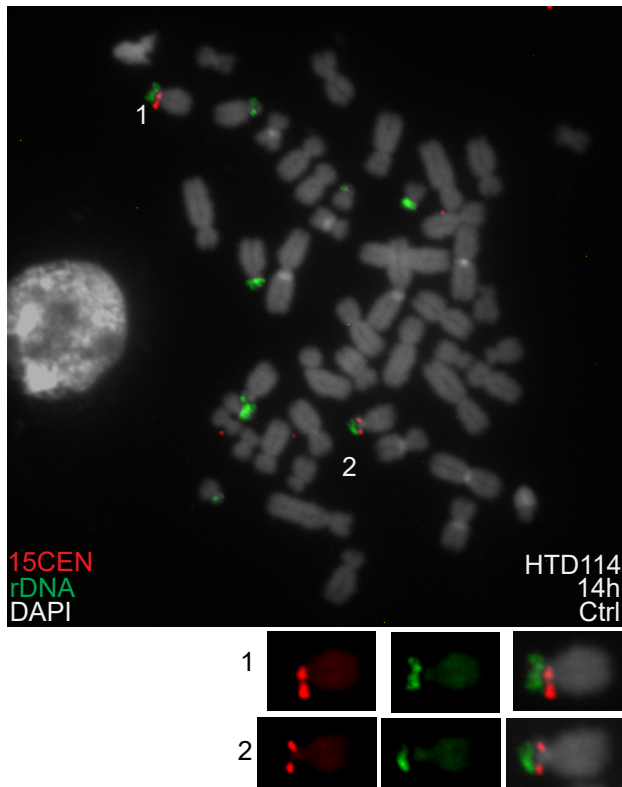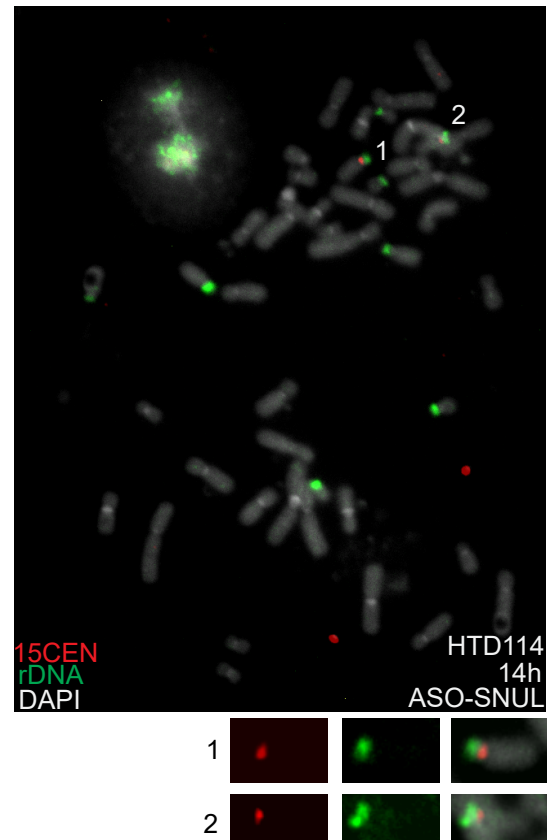**C**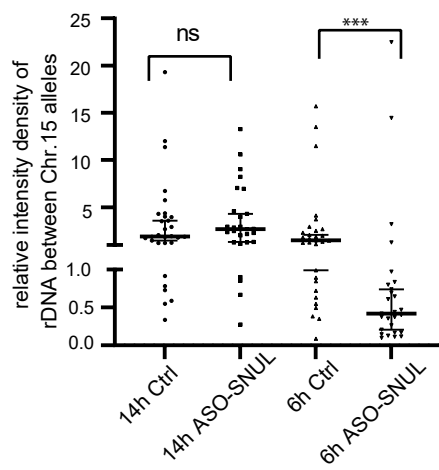

Supplement: supp [file elife_poa_e80684_Figure_5_figure_supplement_3.pdf › elife_poa_e80684_Figure_5_figure_supplement_3.pdf]

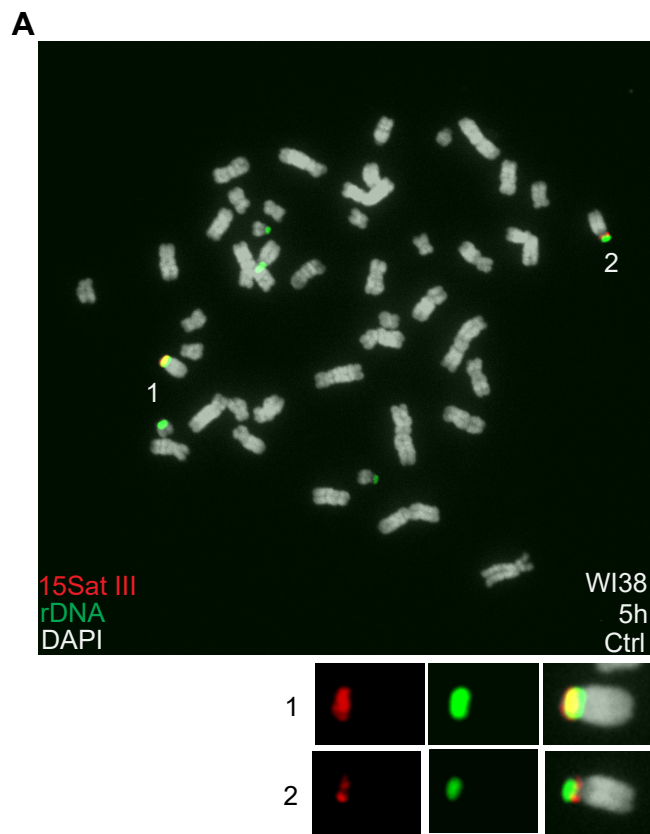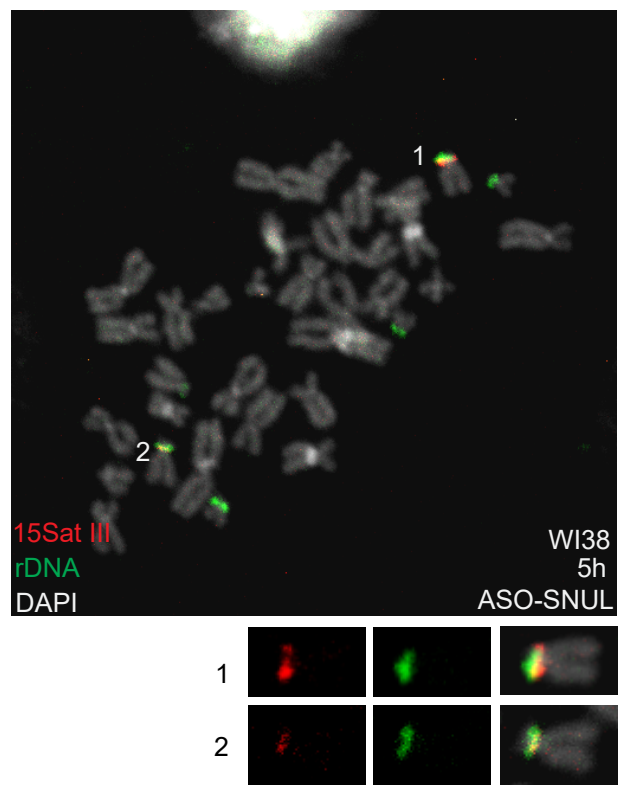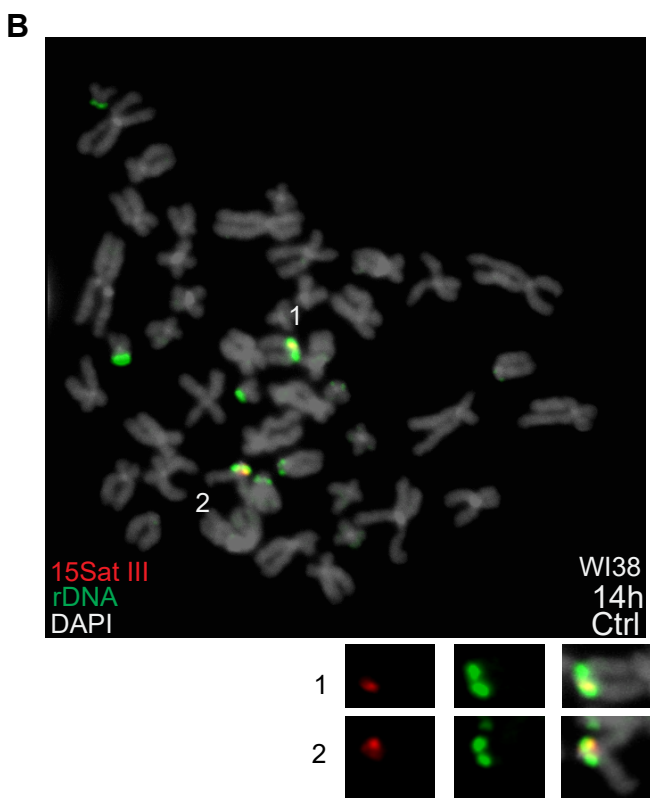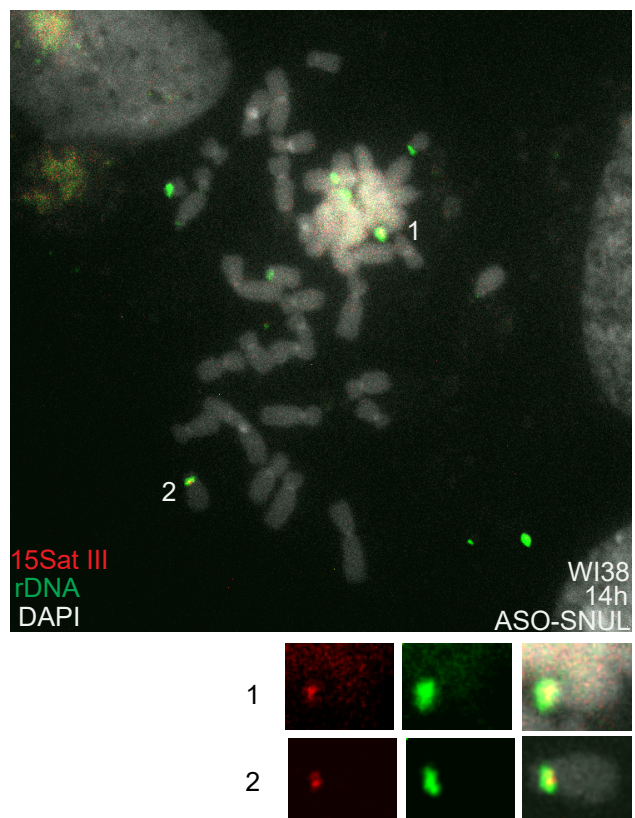

Supplement: supp [file elife_poa_e80684_Figure_5_figure_supplement_4.pdf › elife_poa_e80684_Figure_5_figure_supplement_4.pdf]

**A Control**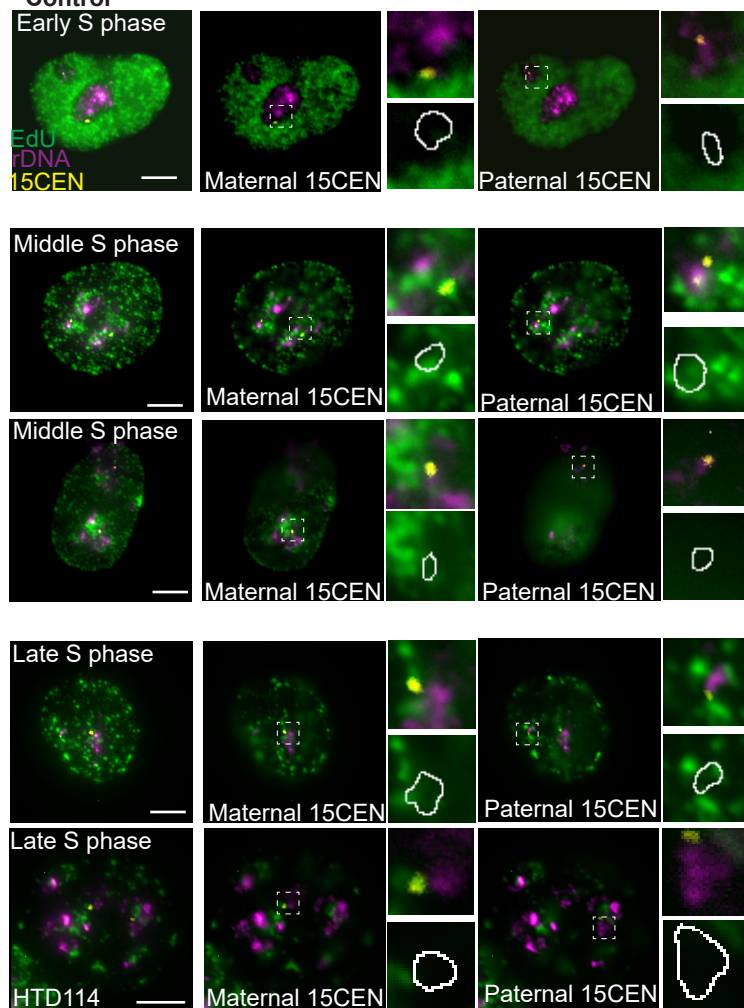**B ASO-SNUL**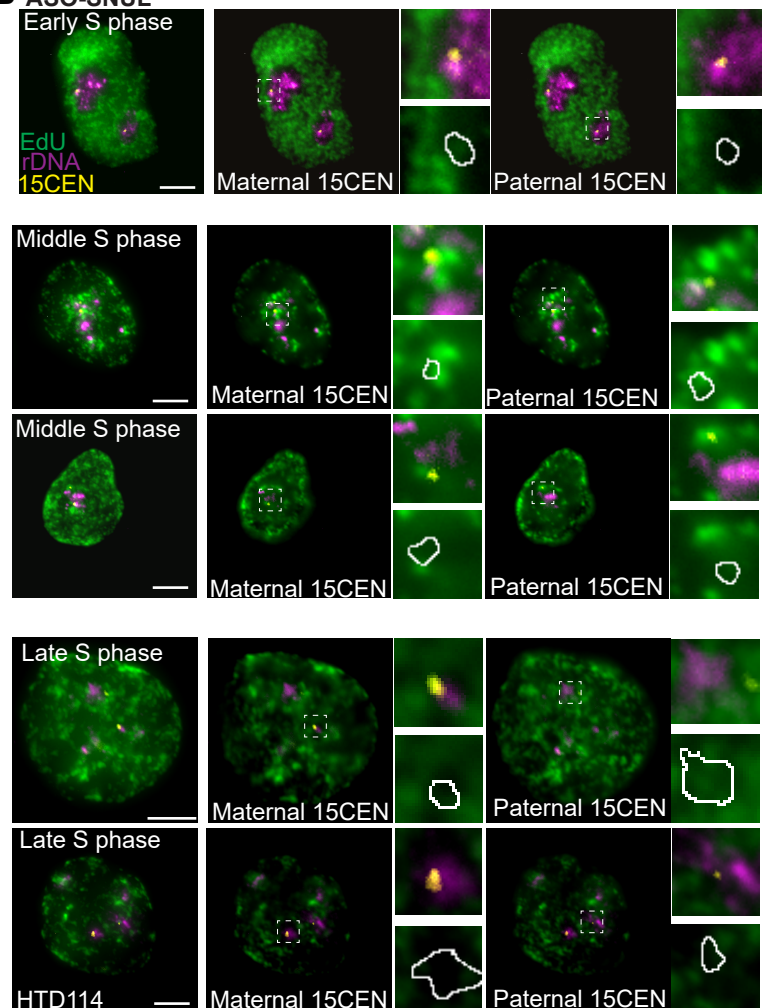**C**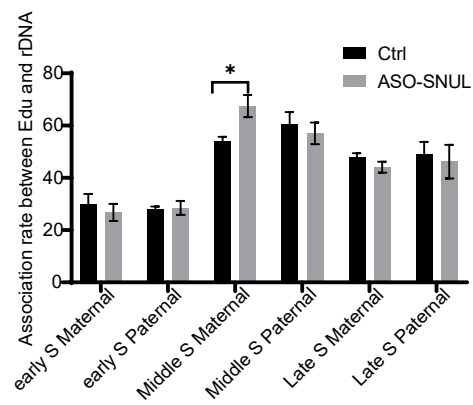

Supplement: supp [file elife_poa_e80684_Figure_5_figure_supplement_5.pdf › elife_poa_e80684_Figure_5_figure_supplement_5.pdf]

**A**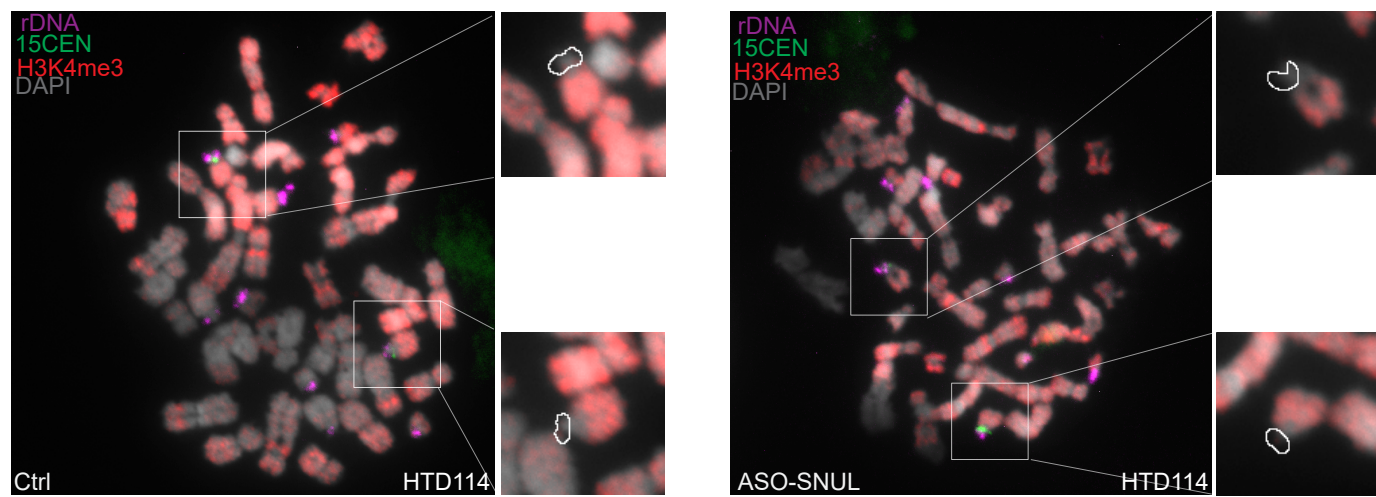**B**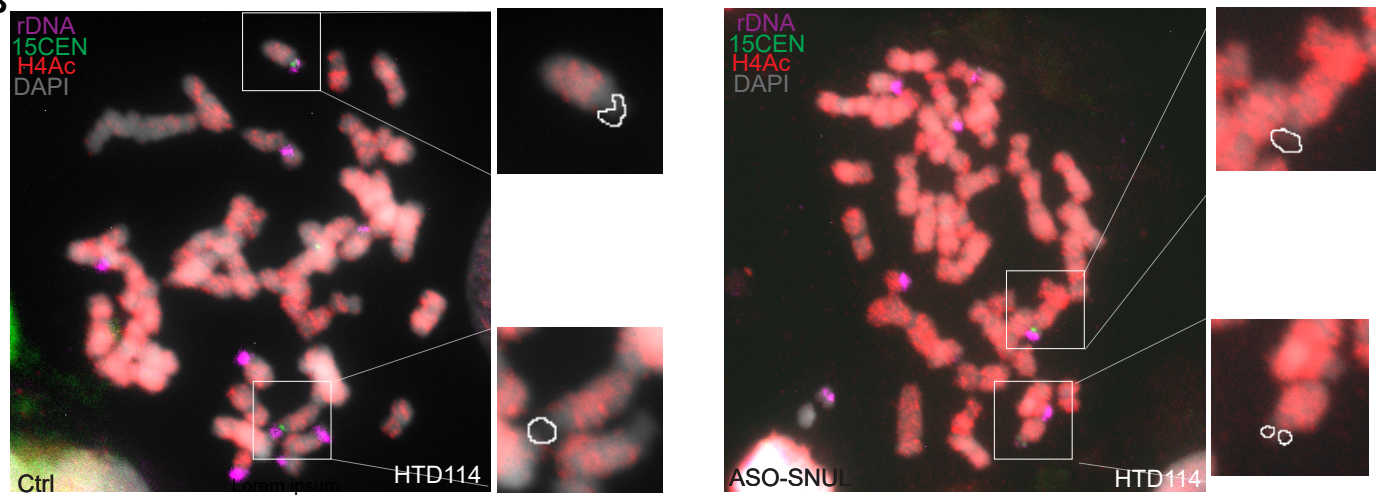**C**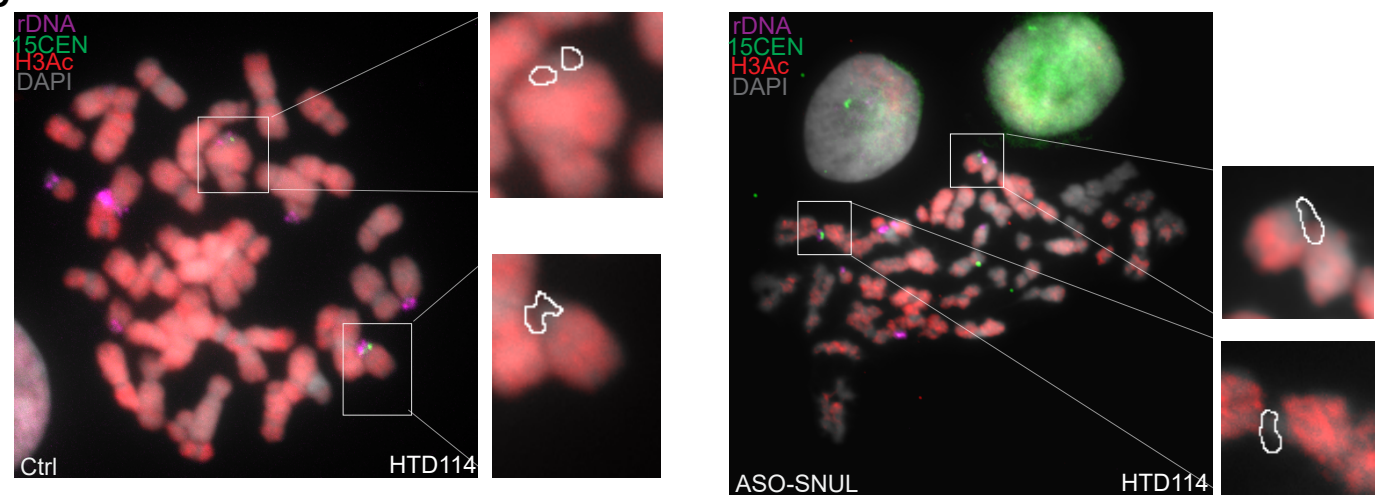**D**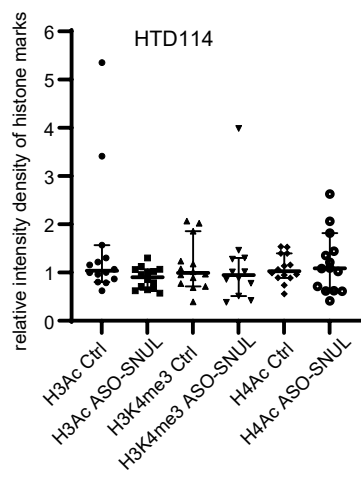

Supplement: supp [file elife_poa_e80684_Figure_5_figure_supplement_6.pdf › elife_poa_e80684_Figure_5_figure_supplement_6.pdf]

Figure 5-figure supplement 7

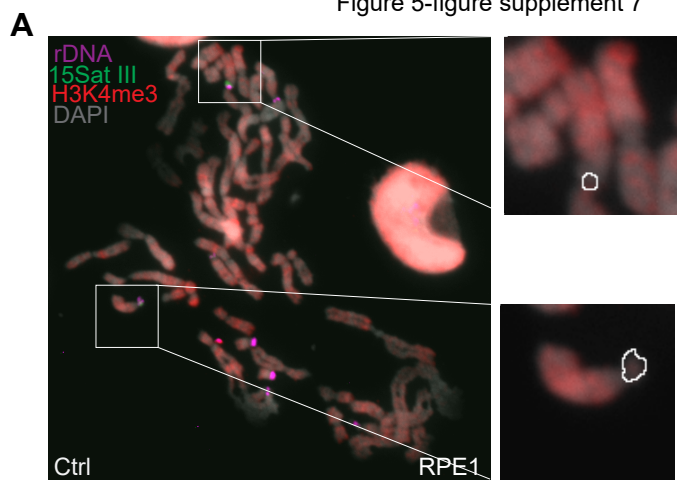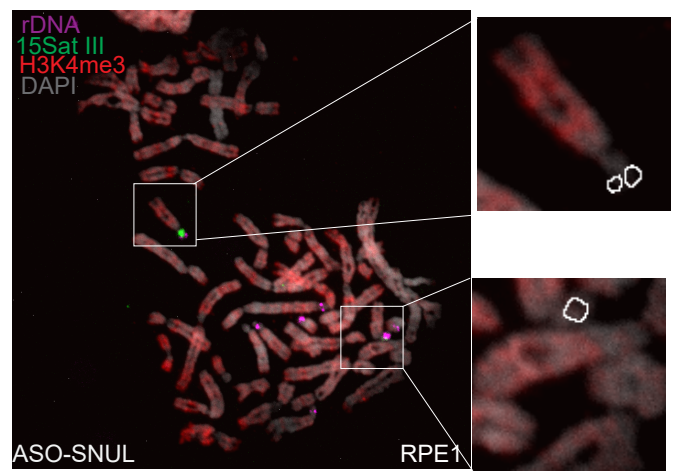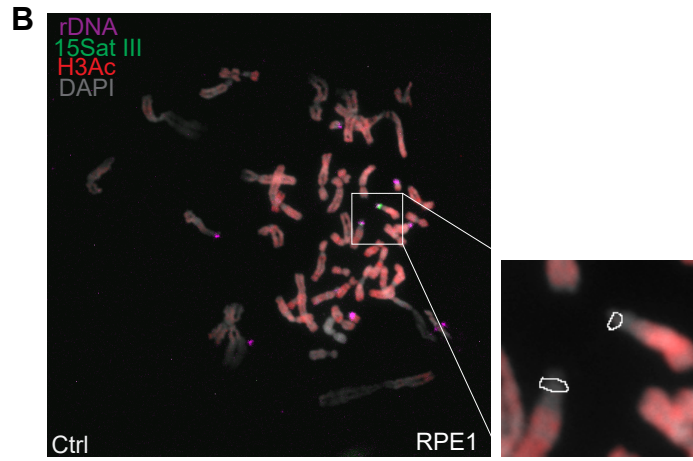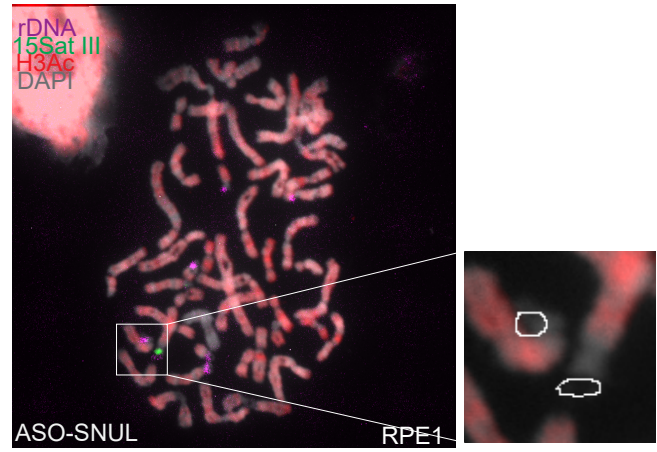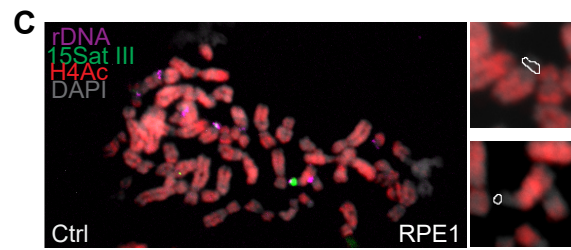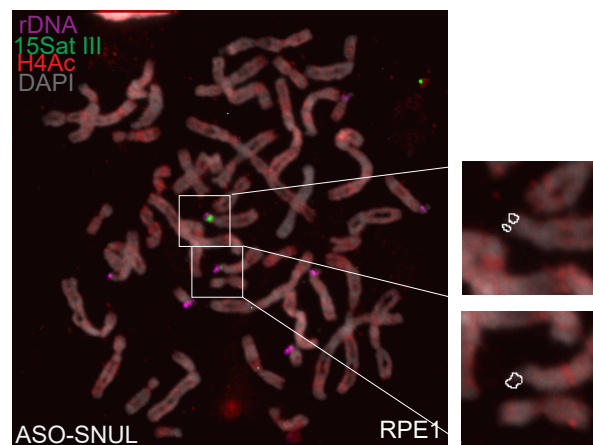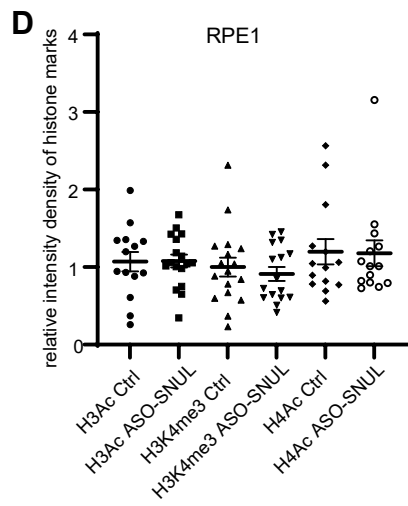

Supplement: supp [file elife_poa_e80684_Figure_5_figure_supplement_7.pdf › elife_poa_e80684_Figure_5_figure_supplement_7.pdf]
